# Supplementary material for: Genomic evidence for the suitability of Göttingen Minipigs with a rare seizure phenotype as a model for human epilepsy
Source: Springer Nature journal article supplement (doi:10.1007/s10048-024-00750-2), 2024-02-21

**396677 F3**

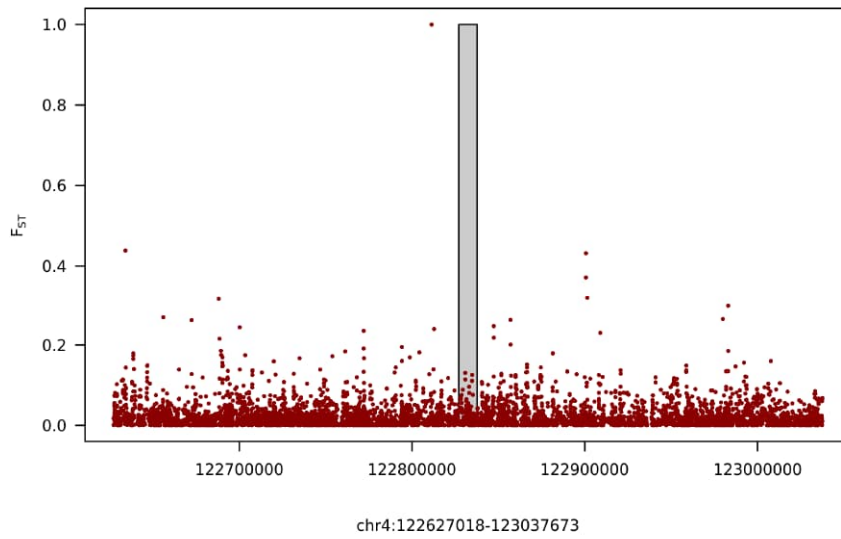

**Seizure**

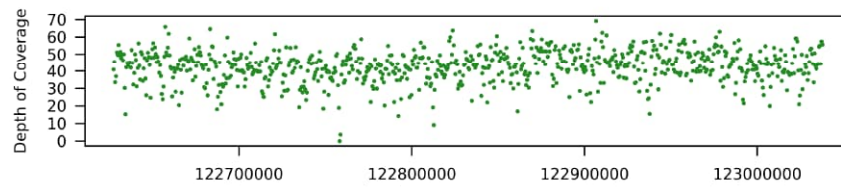

**d21**

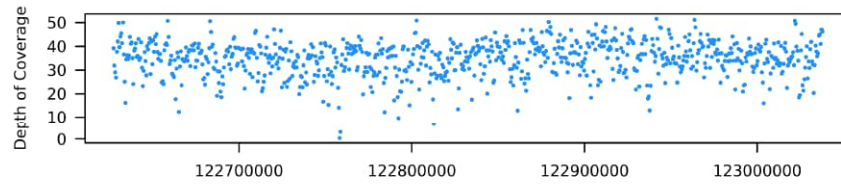

**d22**

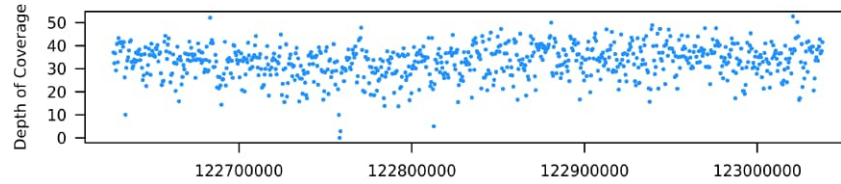

**d31**

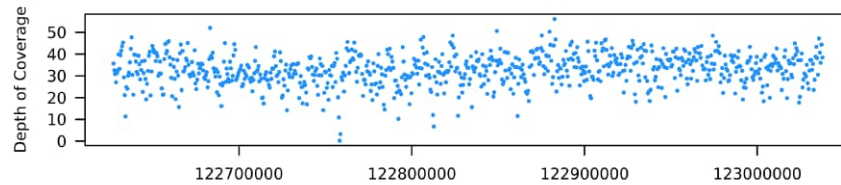

**d32**

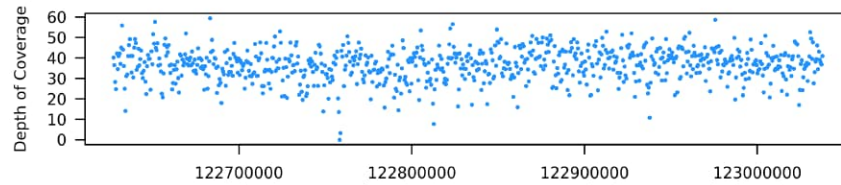

### 396982 C4BPA

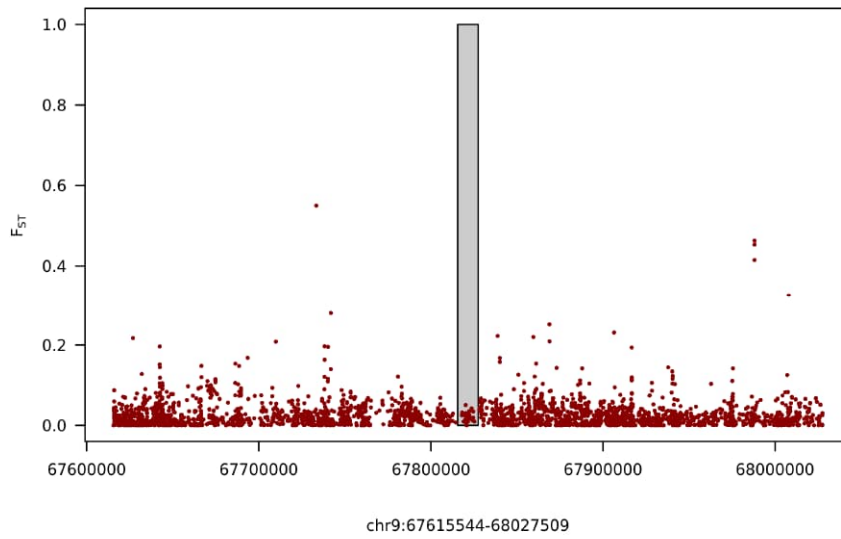

### Seizure

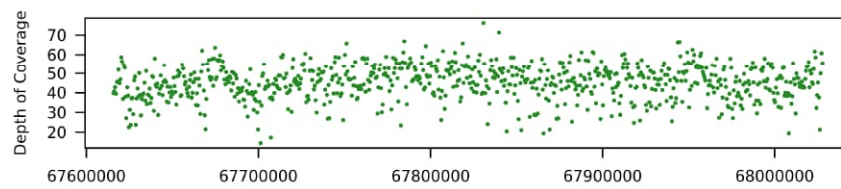

### d21

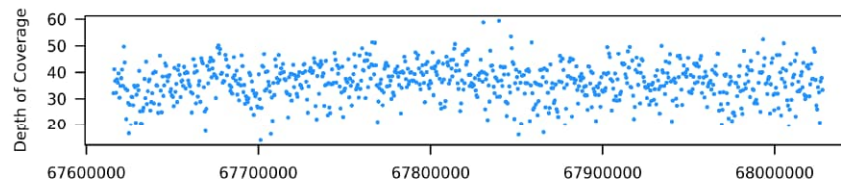

### d22

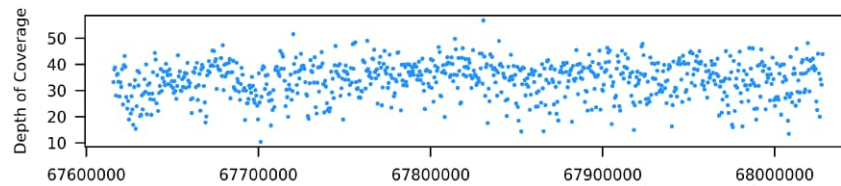

### d31

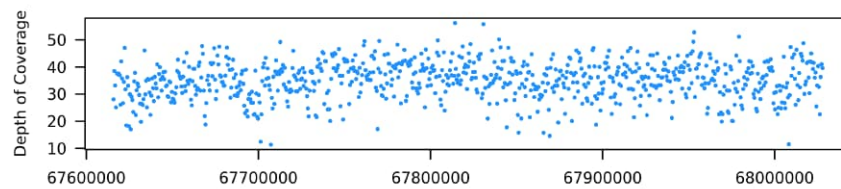

### d32

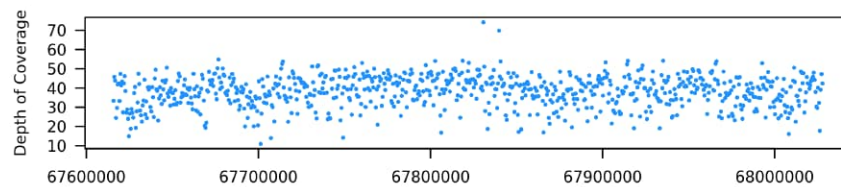

### 397537 LPL

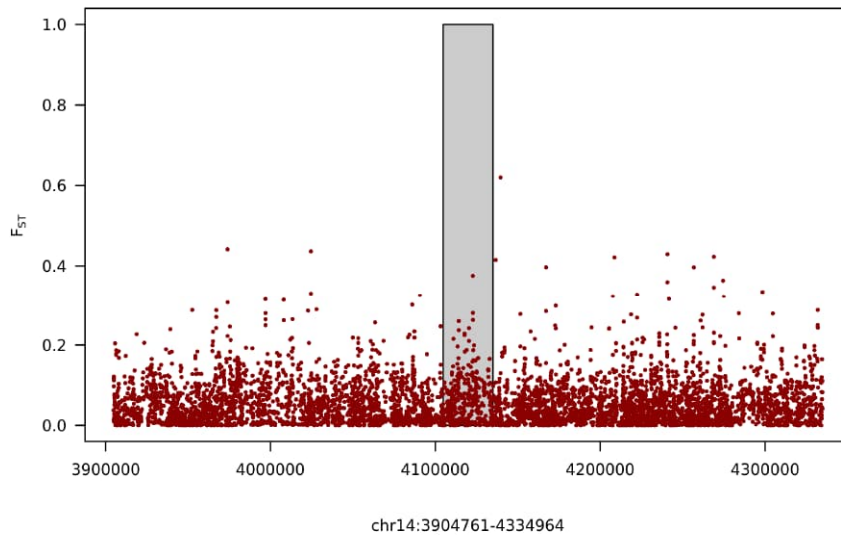

### Seizure

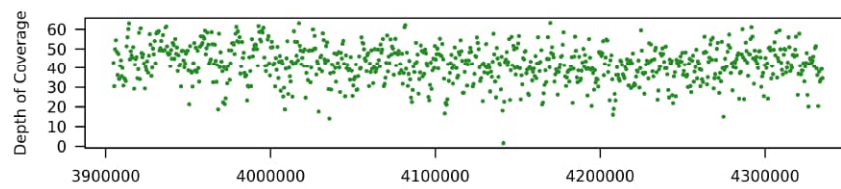

### d21

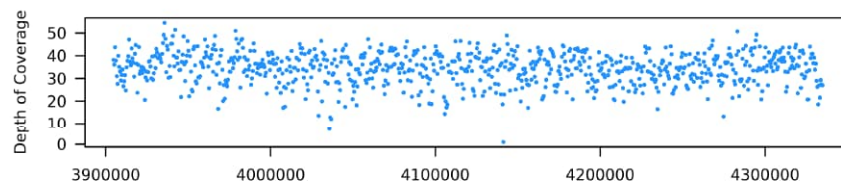

### d22

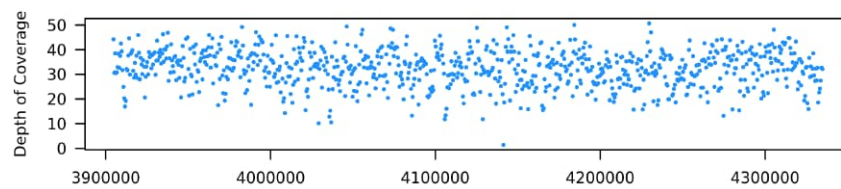

### d31

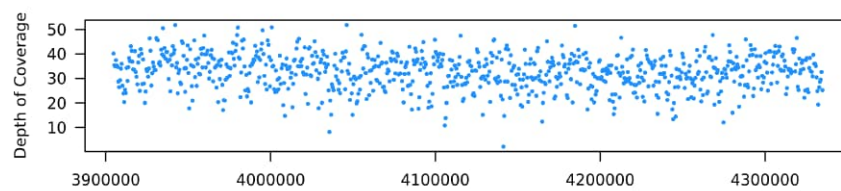

### d32

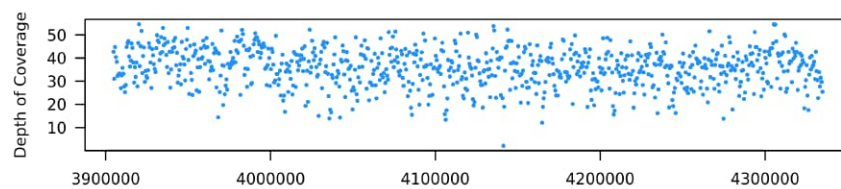

### 100155343 MKRN3

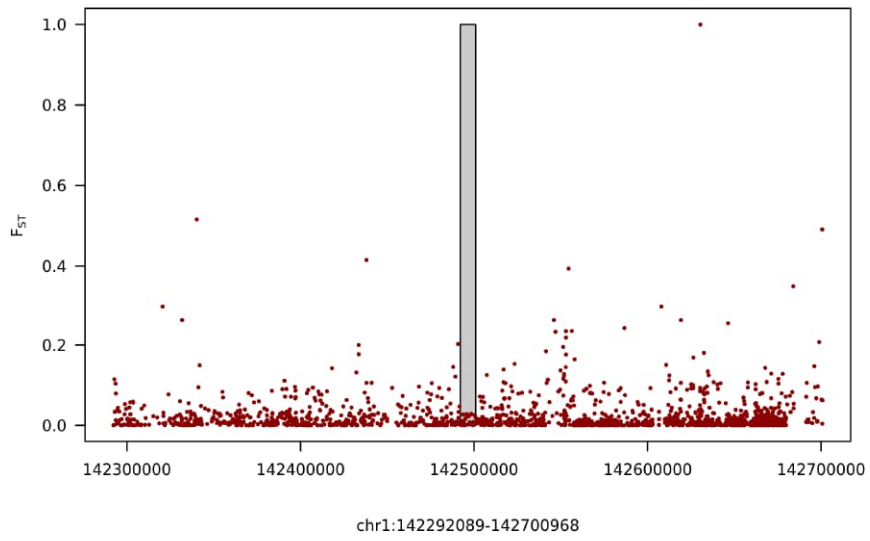

### Seizure

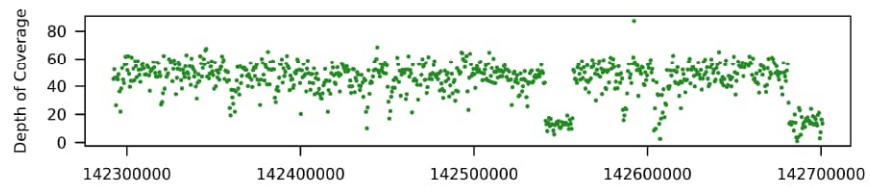

### d21

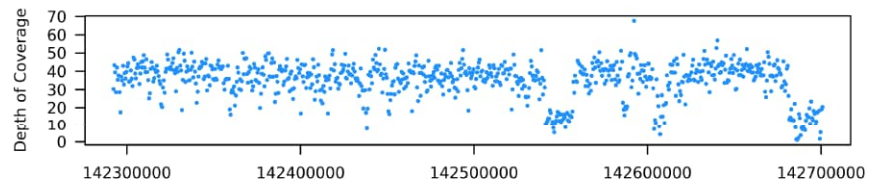

### d22

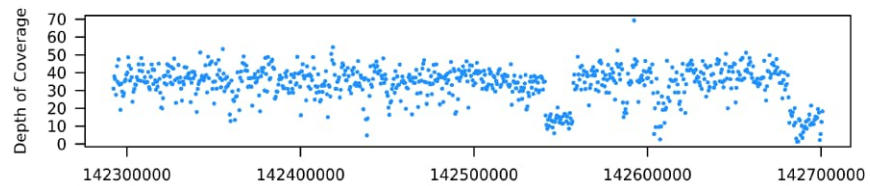

### d31

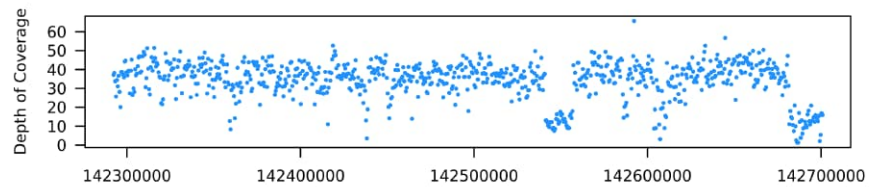

### d32

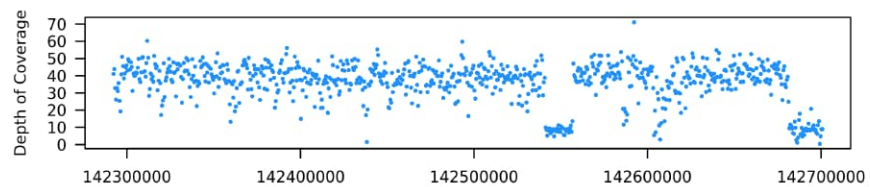



100155671 MAB21L1

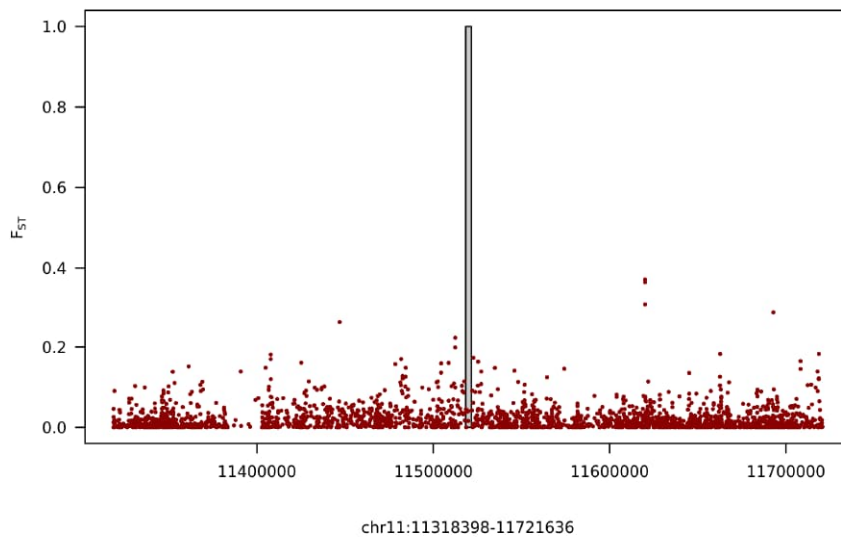

Seizure

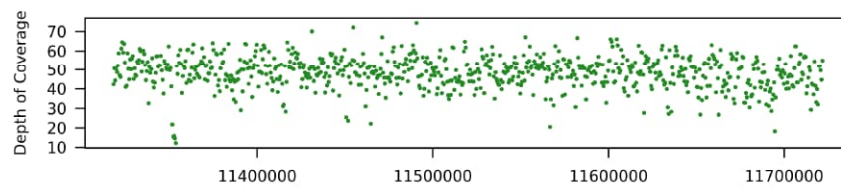

d21

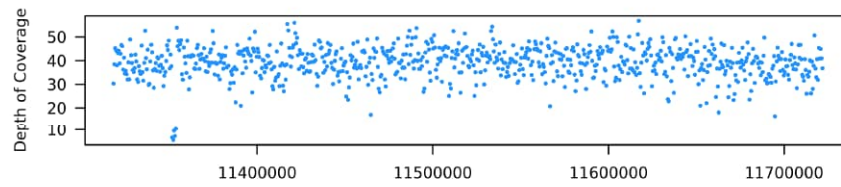

d22

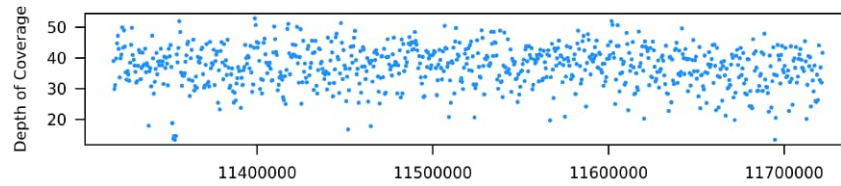

d31

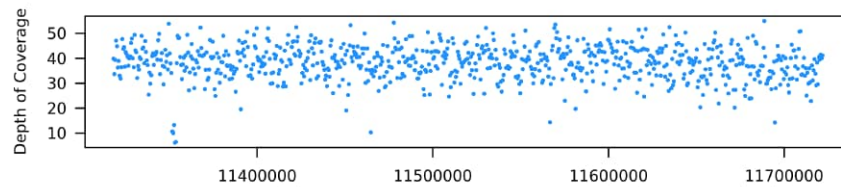

d32

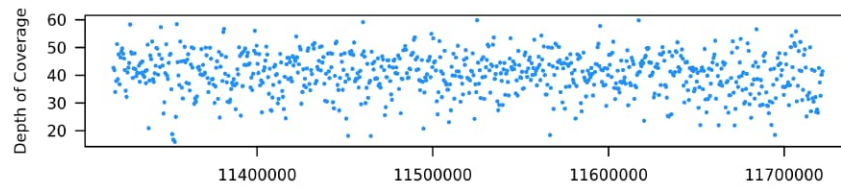

100155706 KHDRBS3

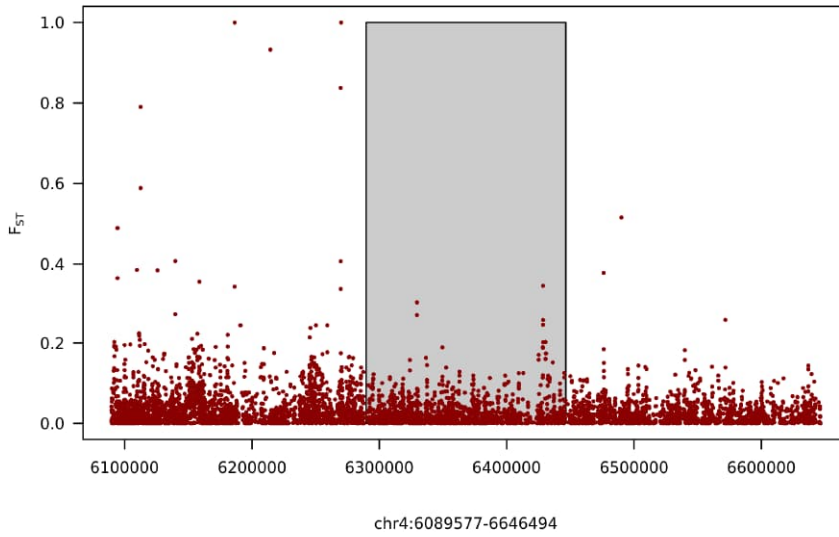

Seizure

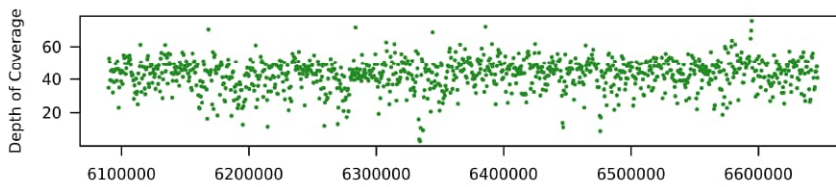

d21

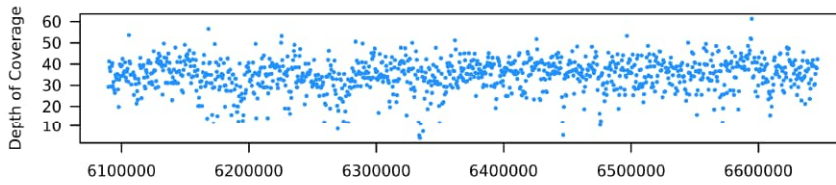

d22

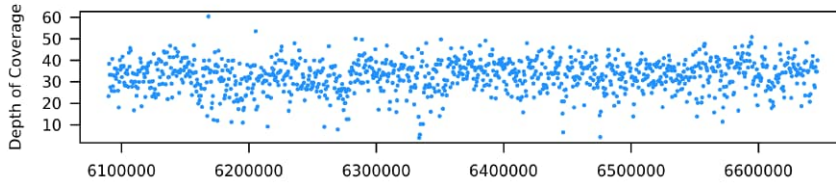

d31

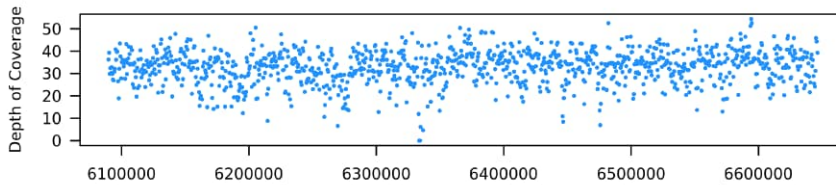

d32

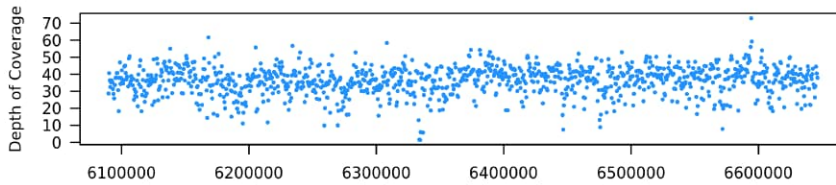

# 100155963 MMRN2

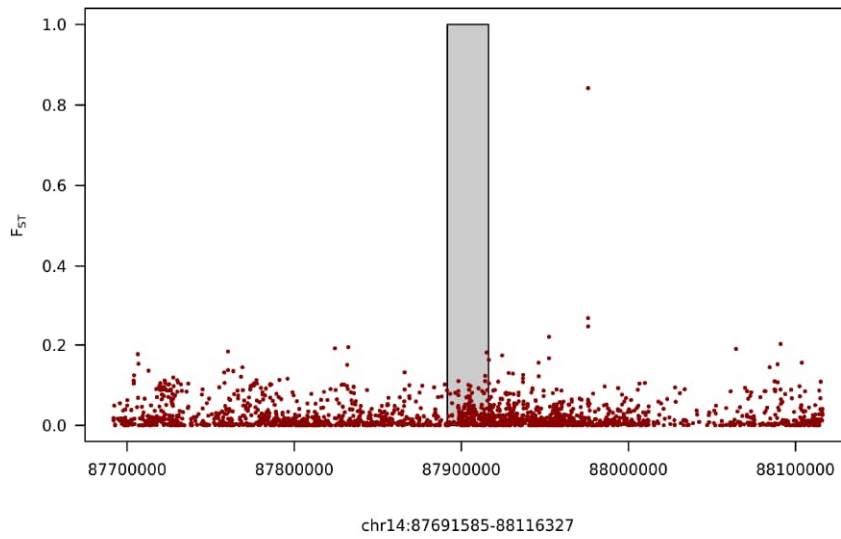

## Seizure

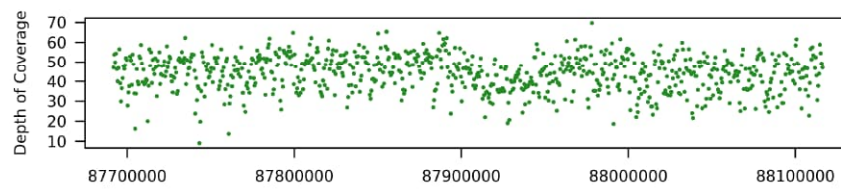

## d21

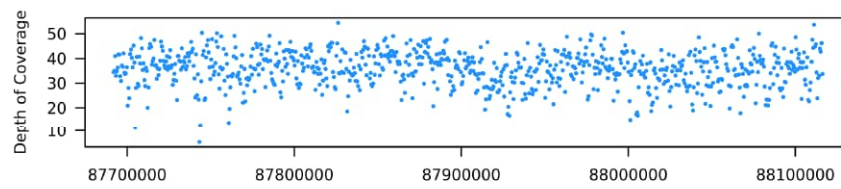

## d22

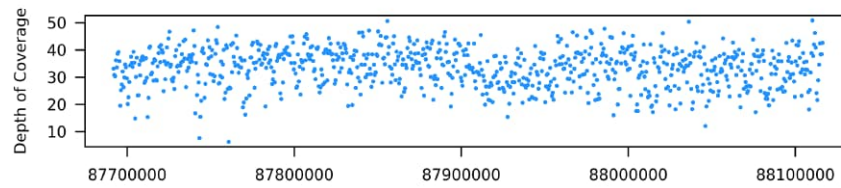

## d31

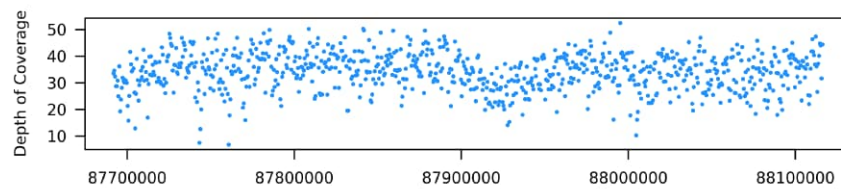

## d32

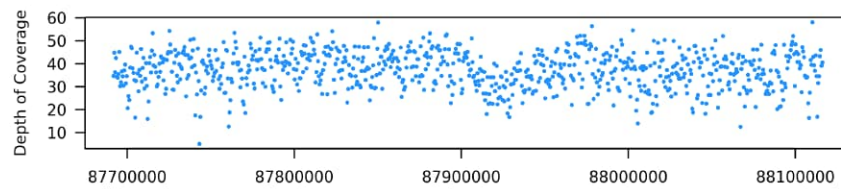

**100156493 MN1**

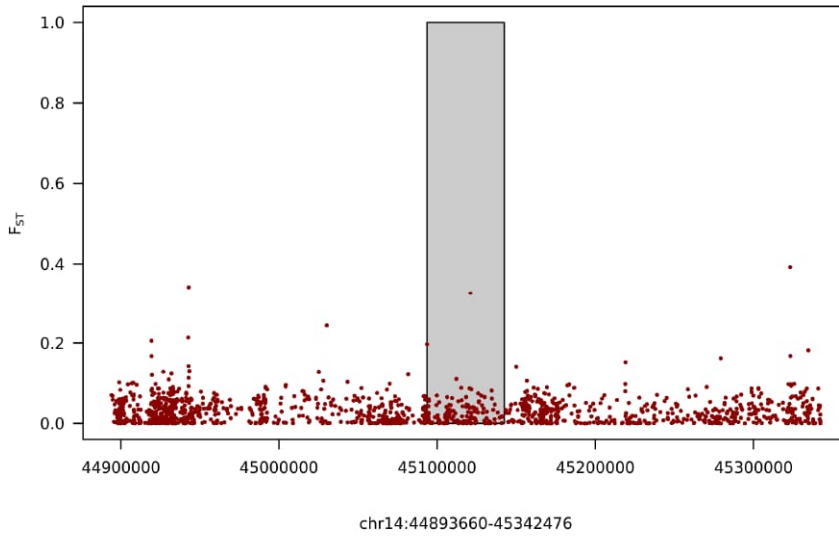

**Seizure**

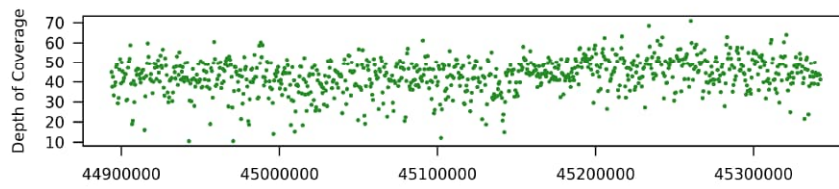

**d21**

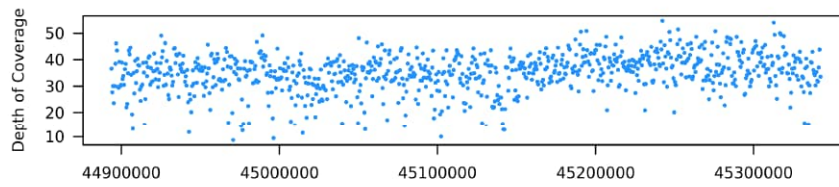

**d22**

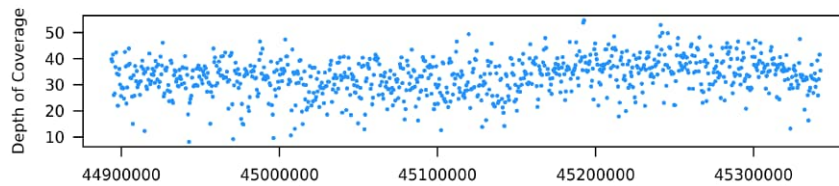

**d31**

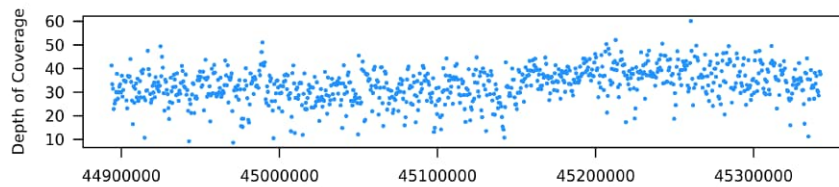

**d32**

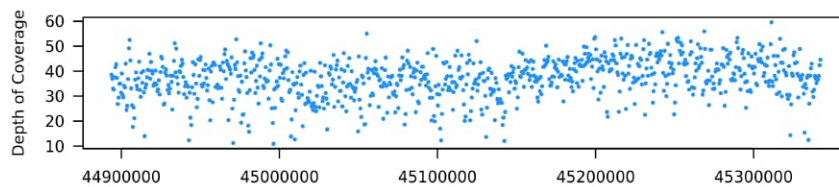



**100157483 SYBU**

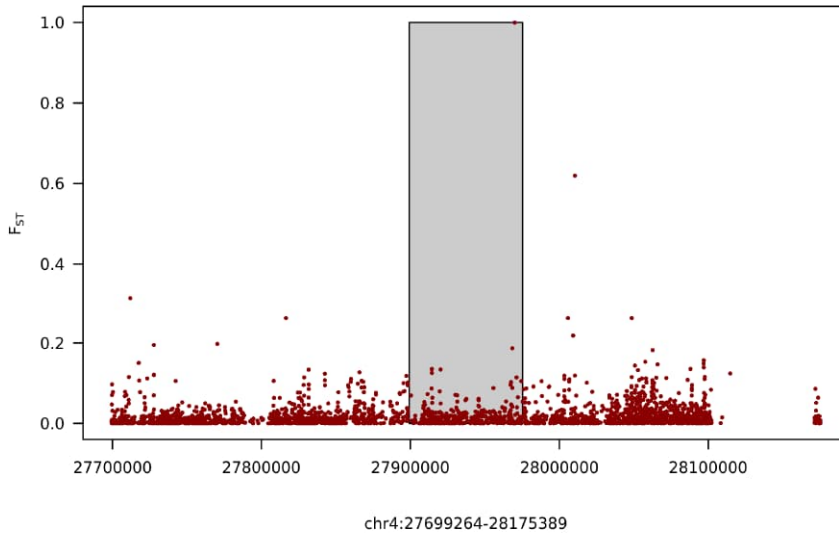

**Seizure**

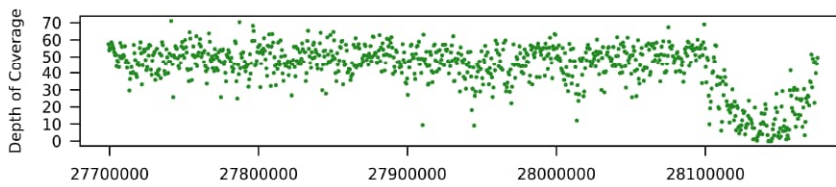

**d21**

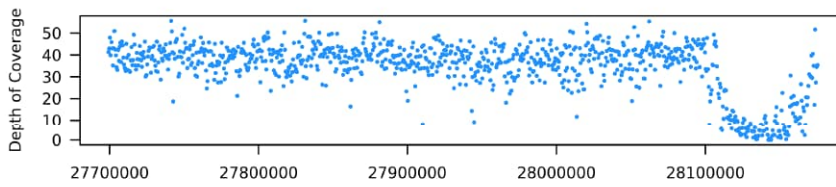

**d22**

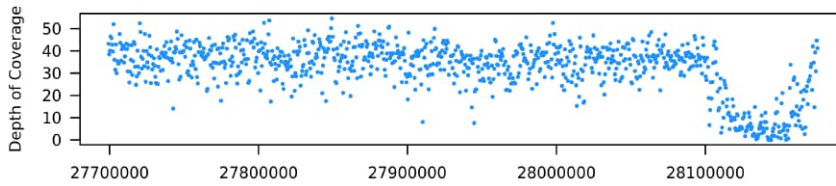

**d31**

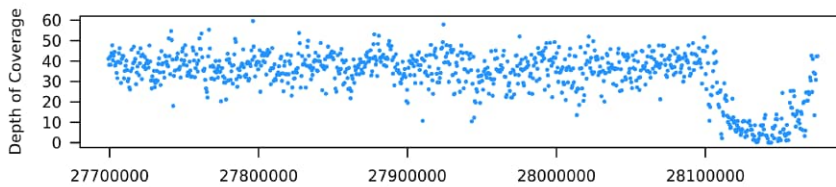

**d32**

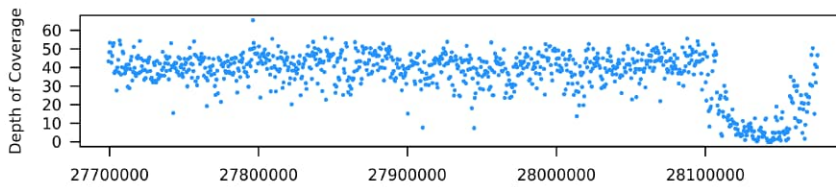

### 100157750 ENO2

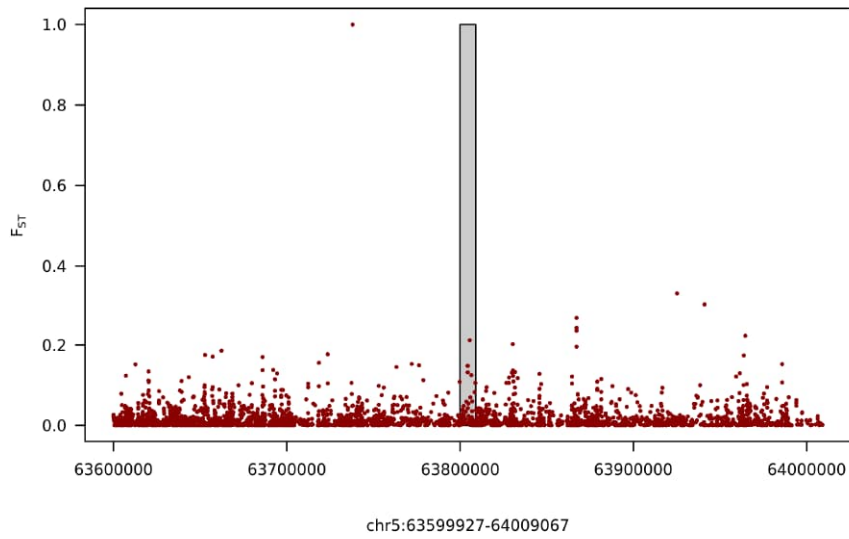

### Seizure

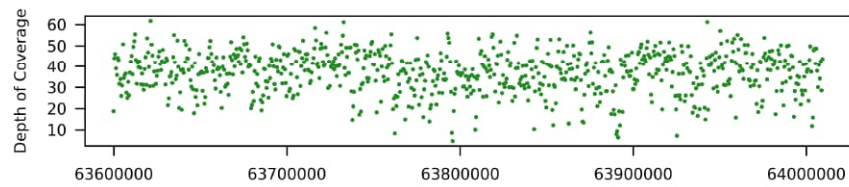

### d21

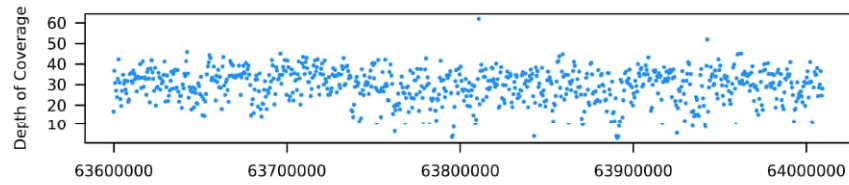

### d22

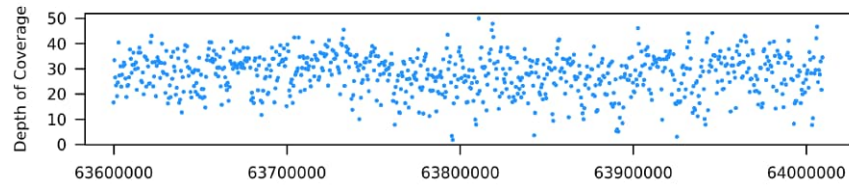

### d31

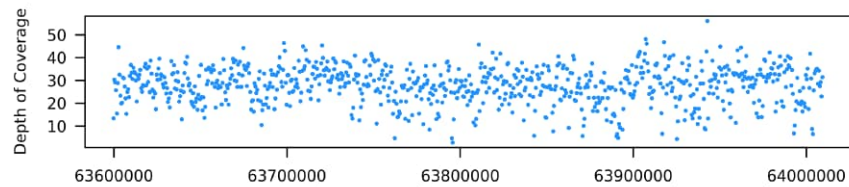

### d32

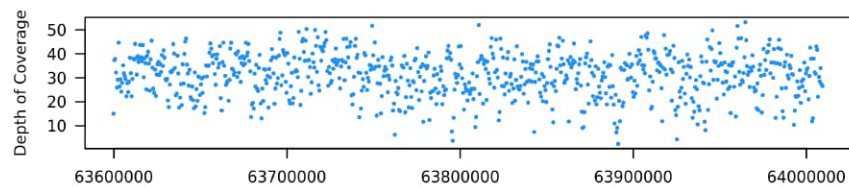

# 100157961 FERMT1

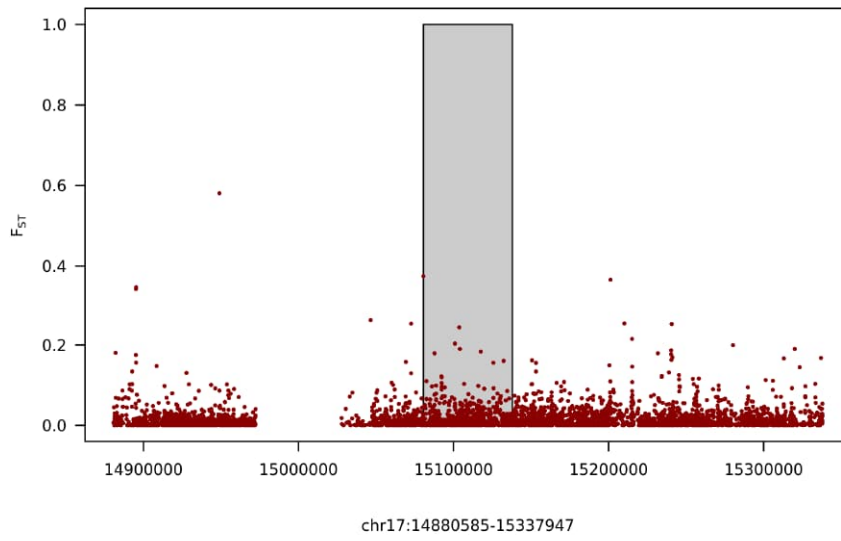

## Seizure

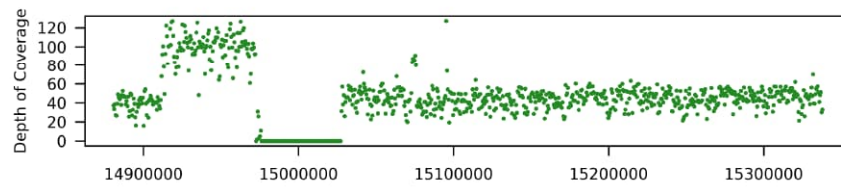

## d21

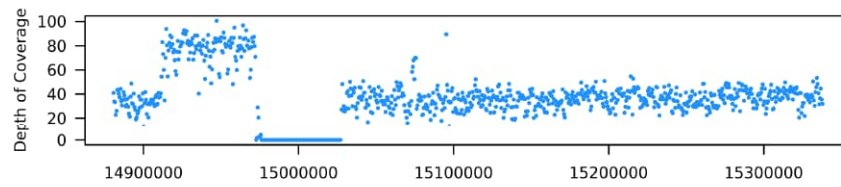

## d22

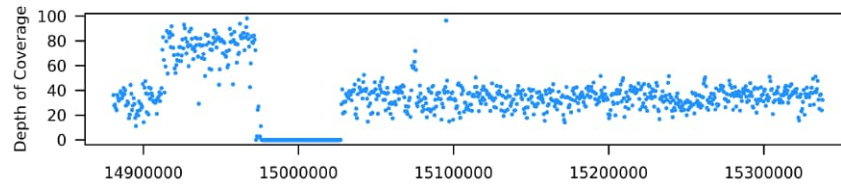

## d31

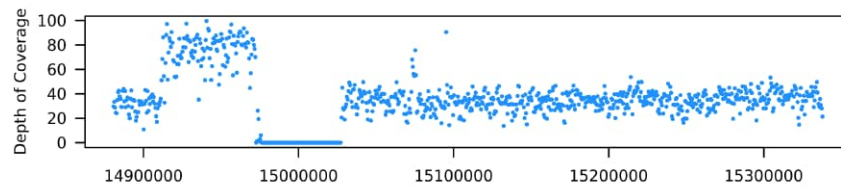

## d32

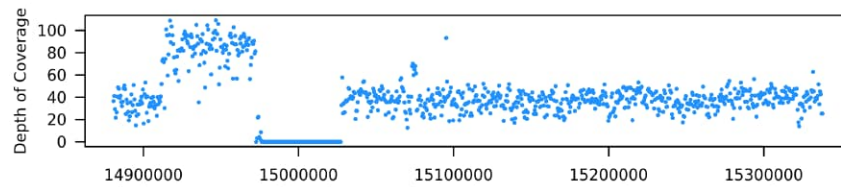

# 100302016 CLDN11

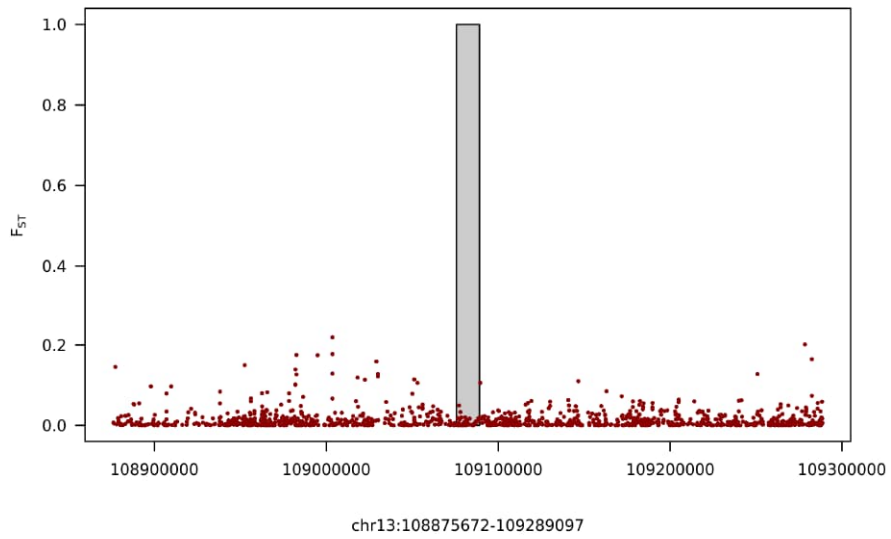

## Seizure

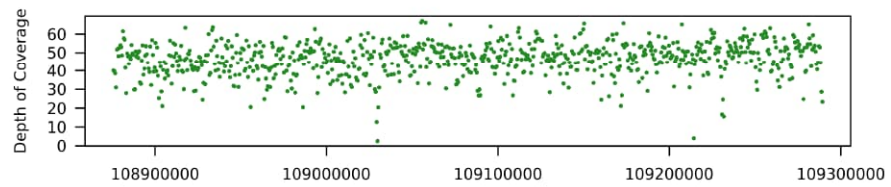

## d21

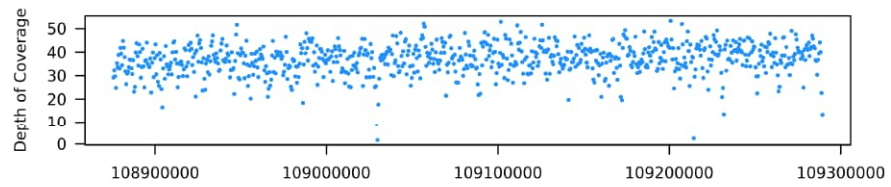

## d22

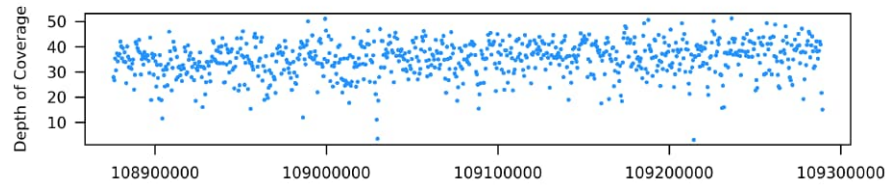

## d31

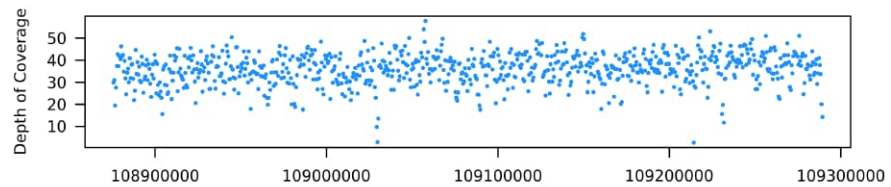

## d32

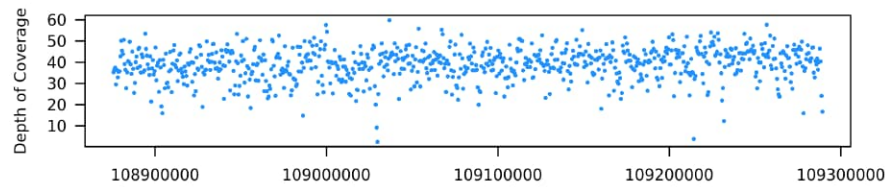



100511446 RASGRP3

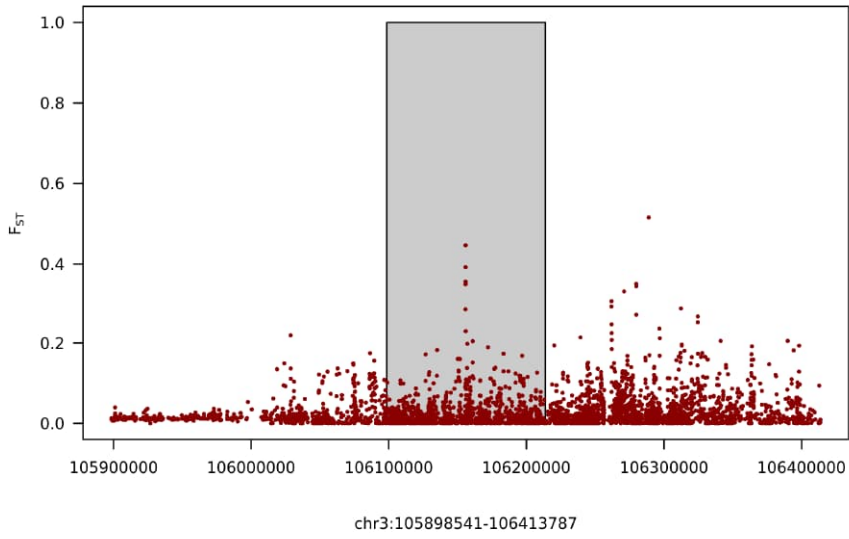

Seizure

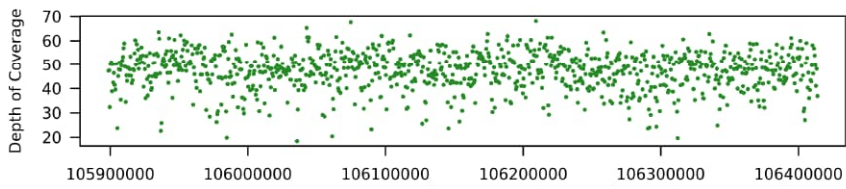

d21

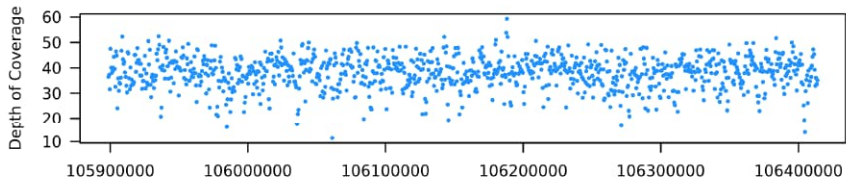

d22

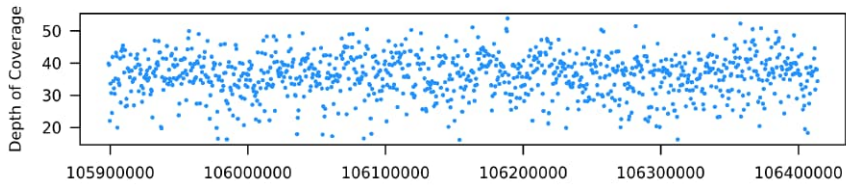

d31

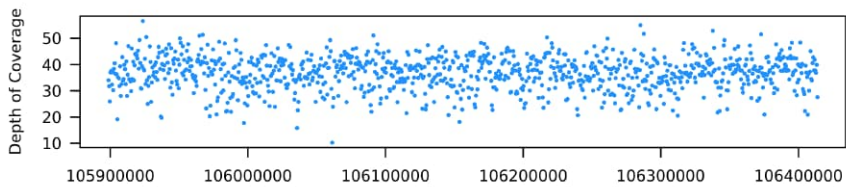

d32

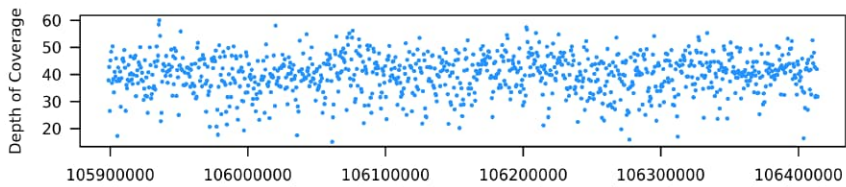

**100514840 HELB**

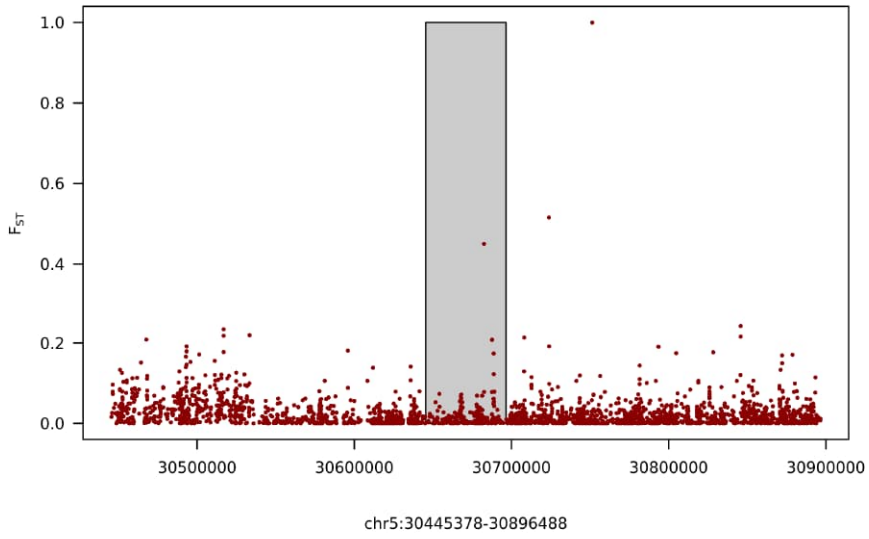

**Seizure**

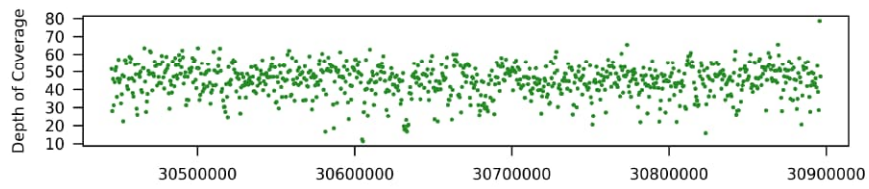

**d21**

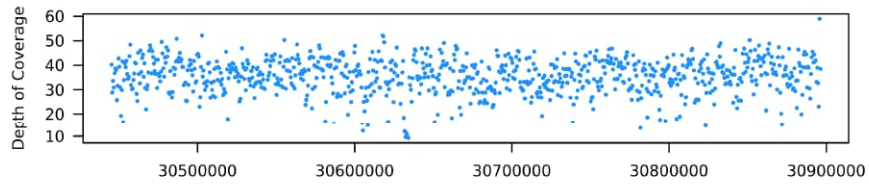

**d22**

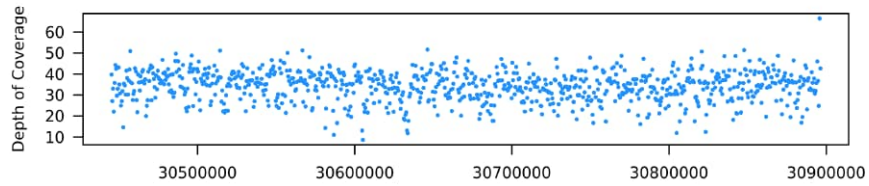

**d31**

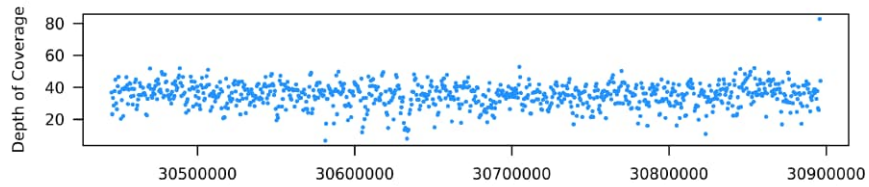

**d32**

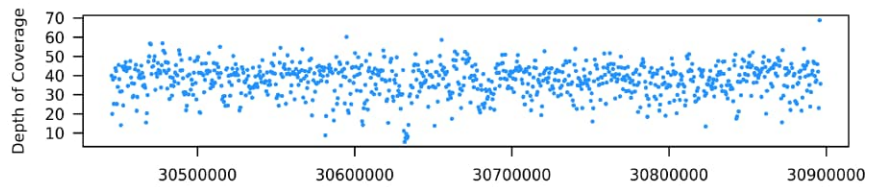

100515336 COL4A1

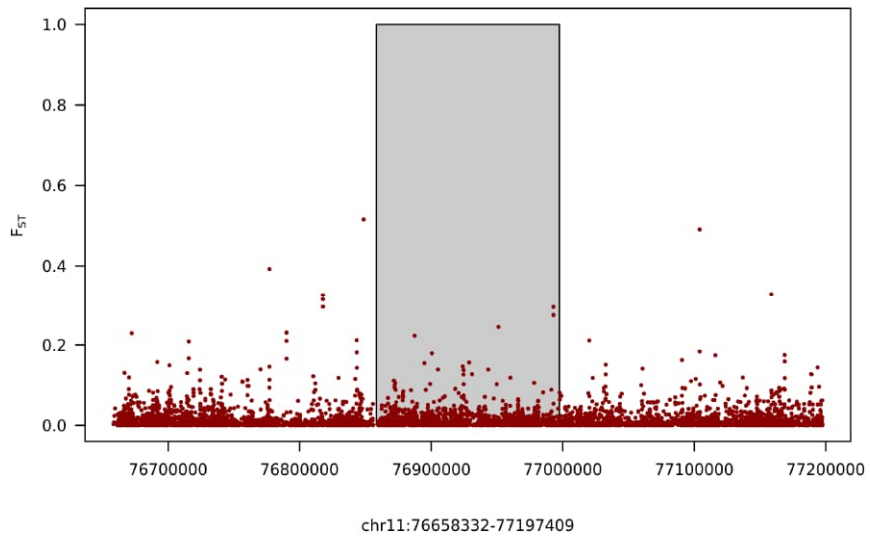

Seizure

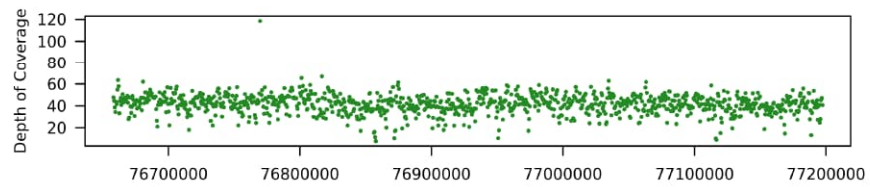

d21

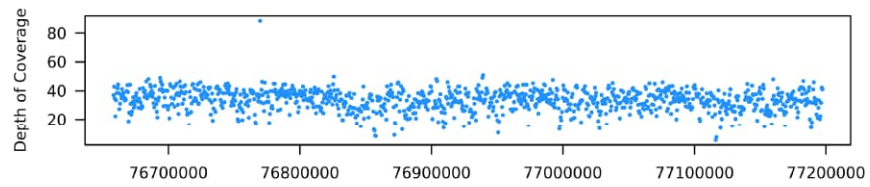

d22

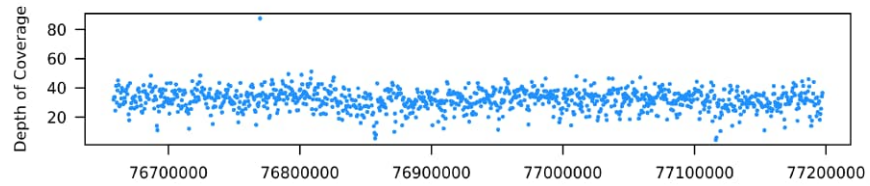

d31

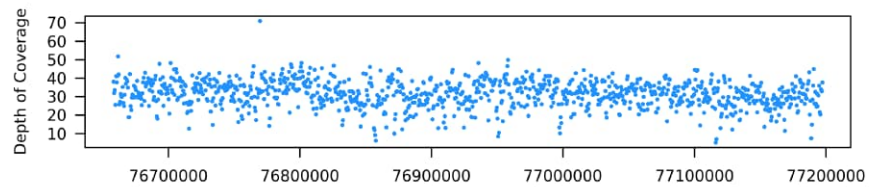

d32

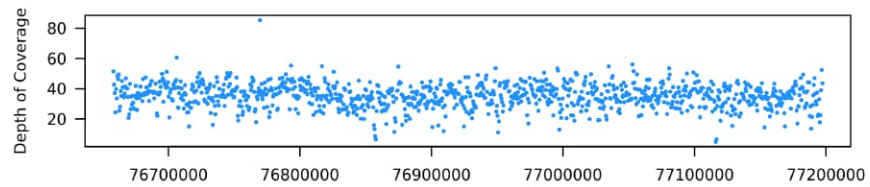

### 100515585 PAX2

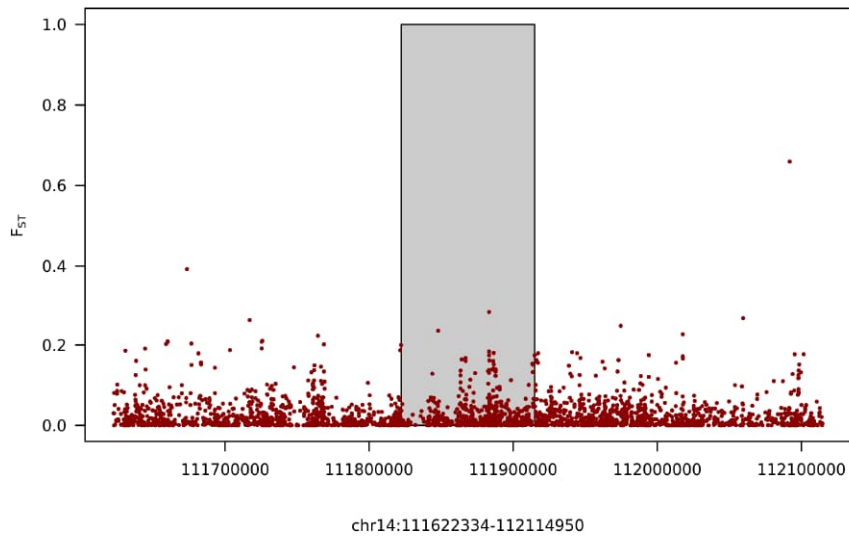

### Seizure

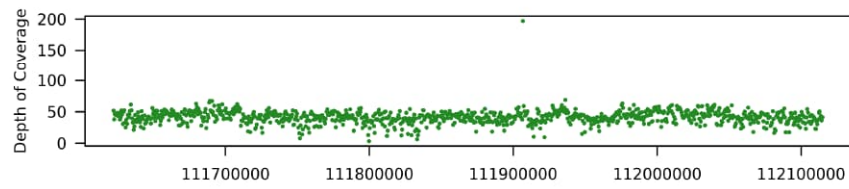

### d21

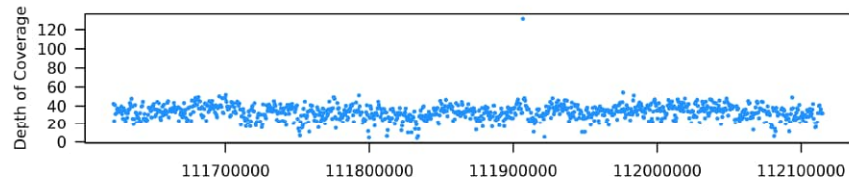

### d22

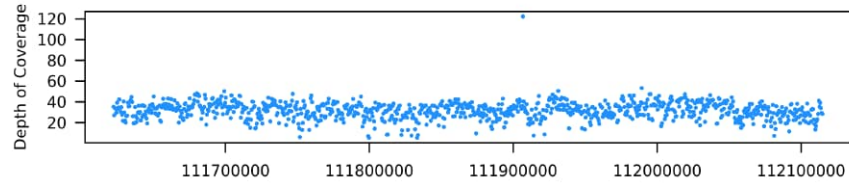

### d31

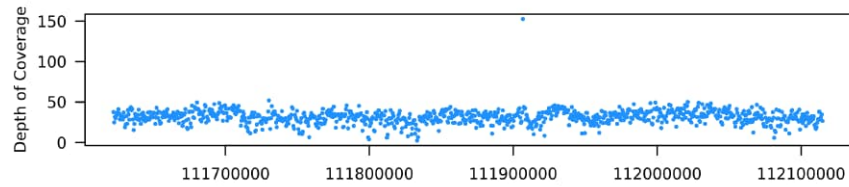

### d32

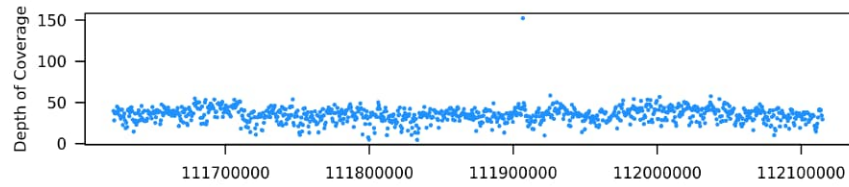



100517187 BCL6B

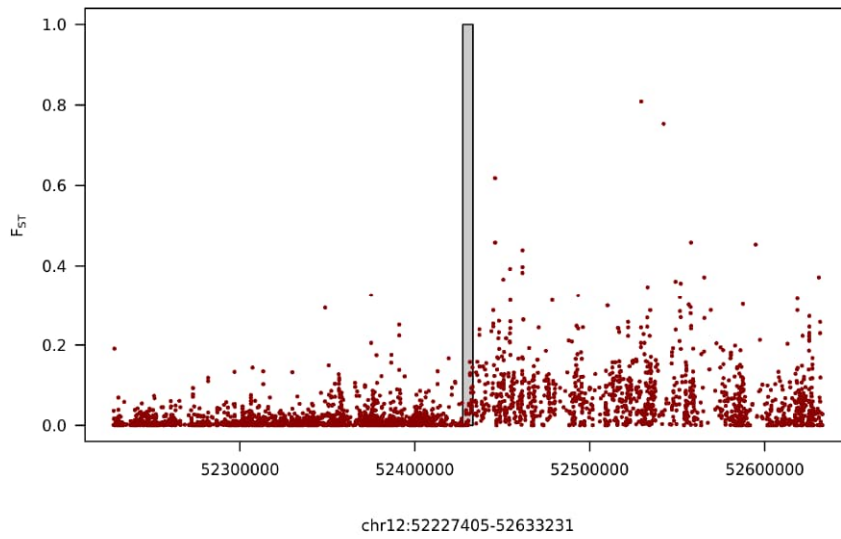

Seizure

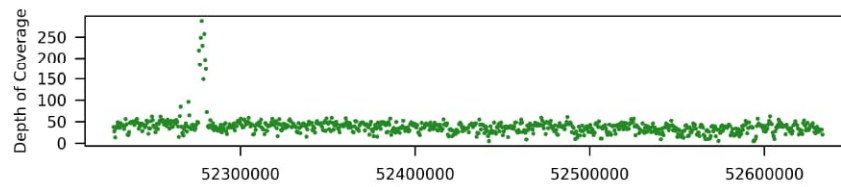

d21

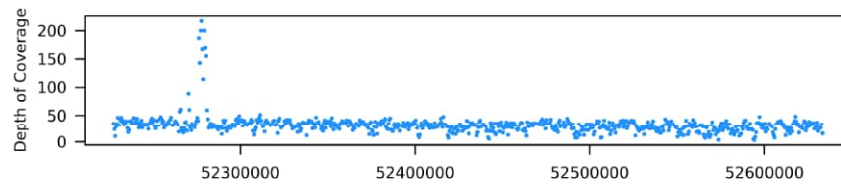

d22

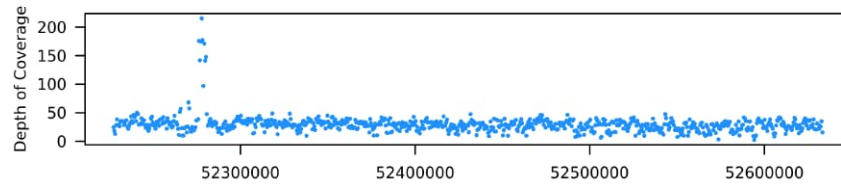

d31

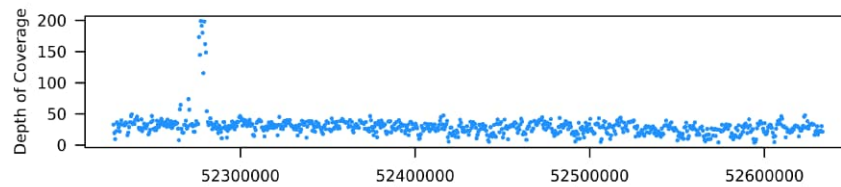

d32

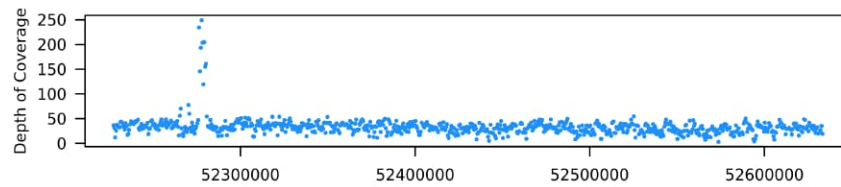

**100518432 MYCL**

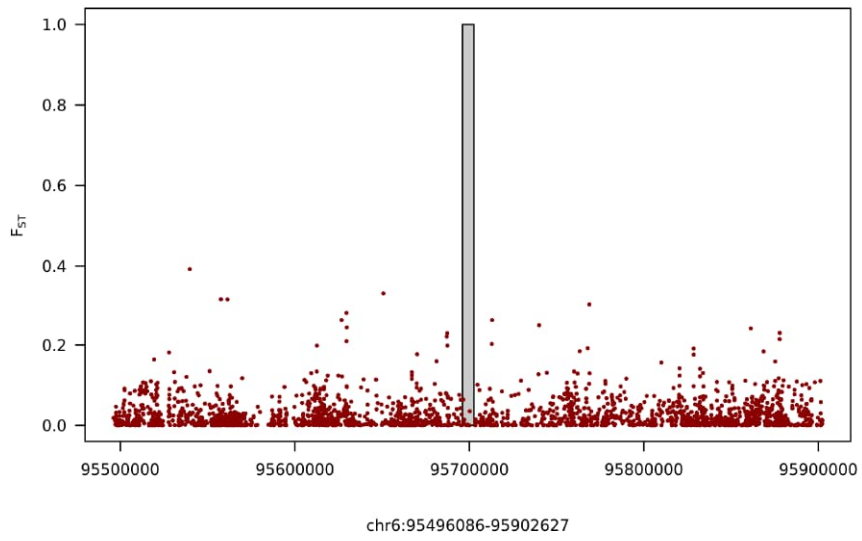

**Seizure**

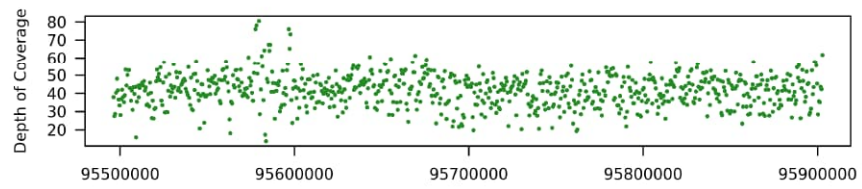

**d21**

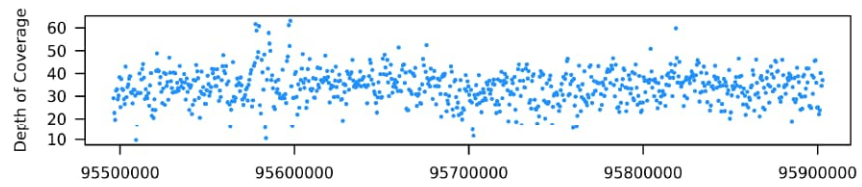

**d22**

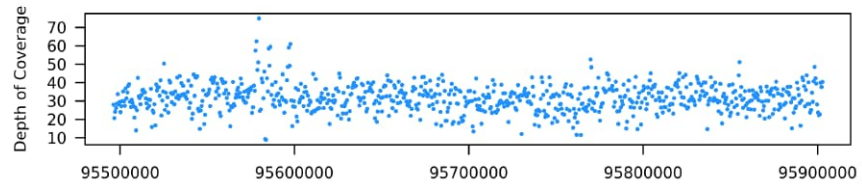

**d31**

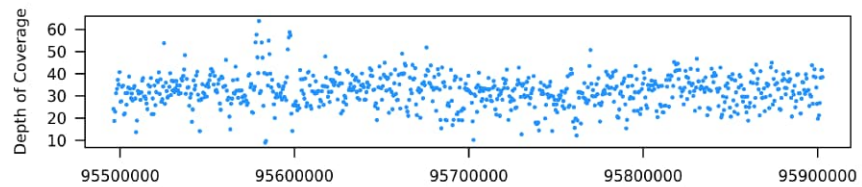

**d32**

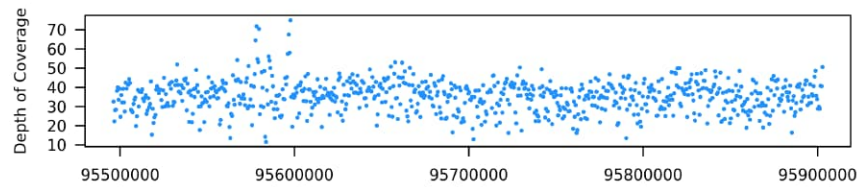

### 100518433 TTC39A

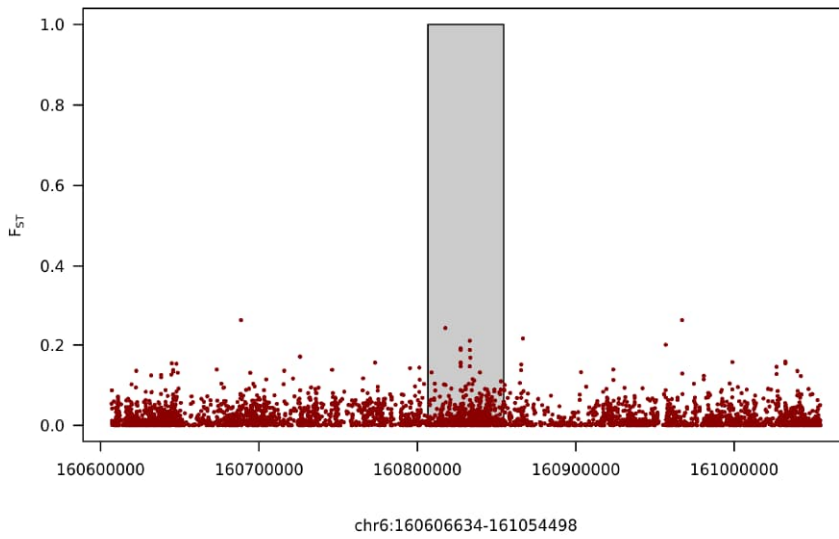

### Seizure

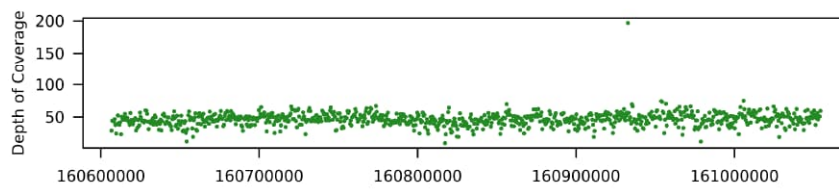

### d21

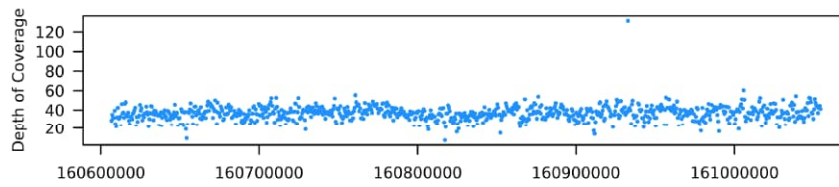

### d22

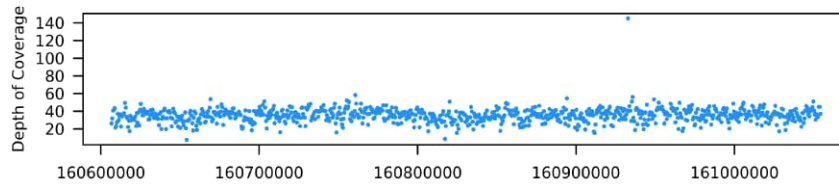

### d31

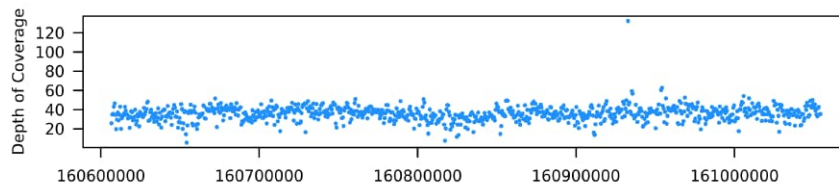

### d32

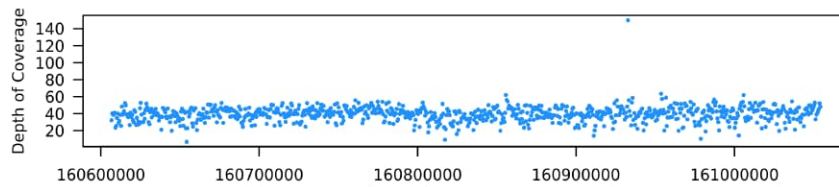

### 100520142 RIC3

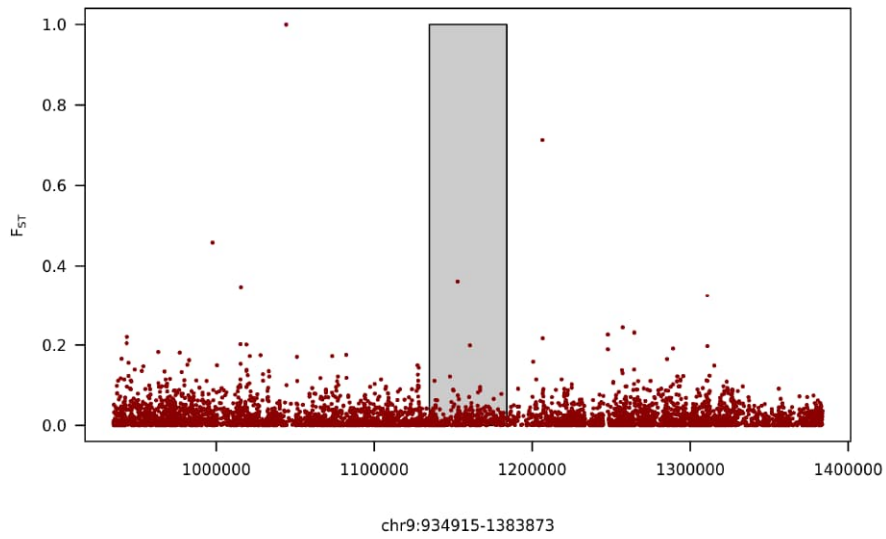

### Seizure

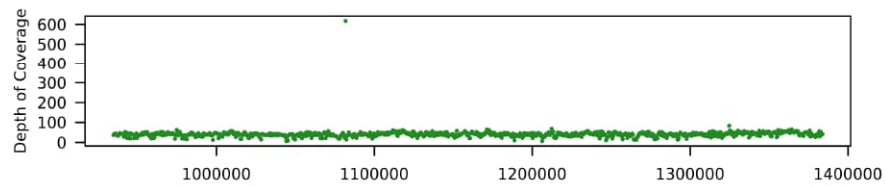

### d21

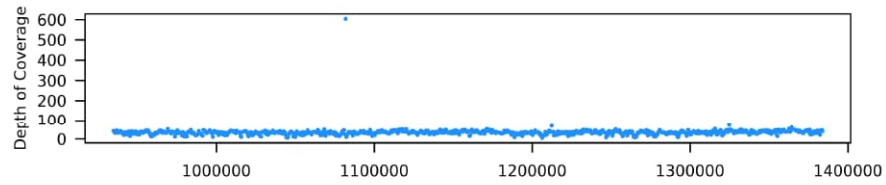

### d22

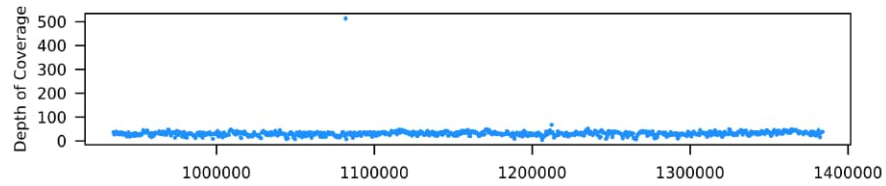

### d31

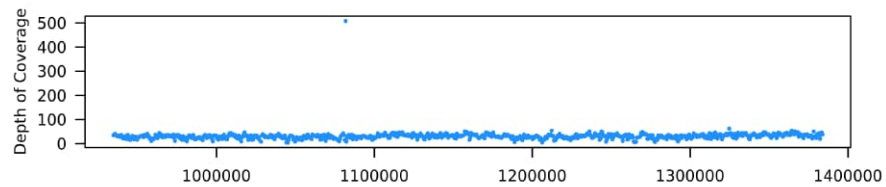

### d32

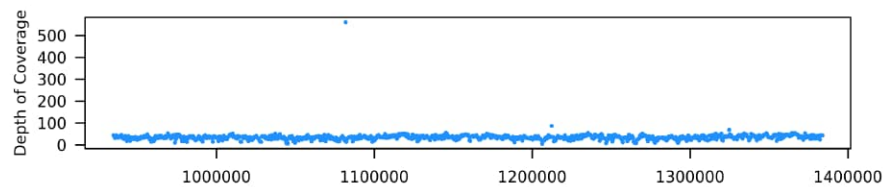



### 100520761 C4BPA

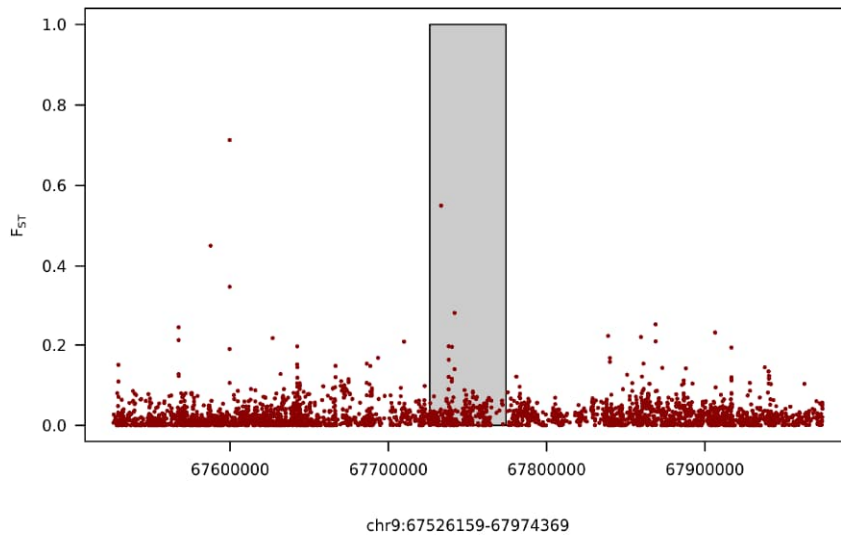

### Seizure

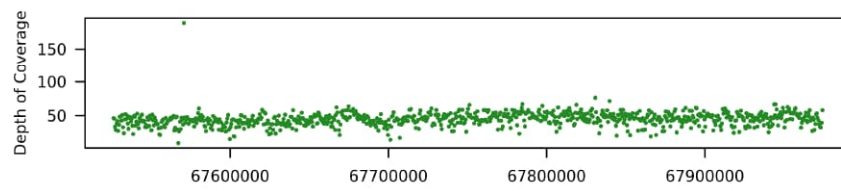

### d21

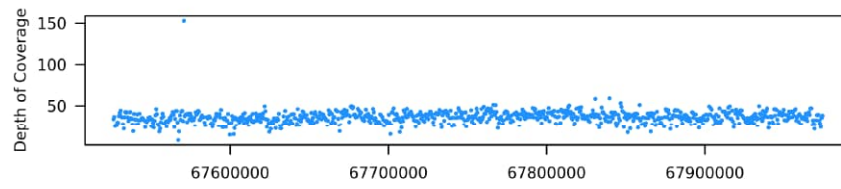

### d22

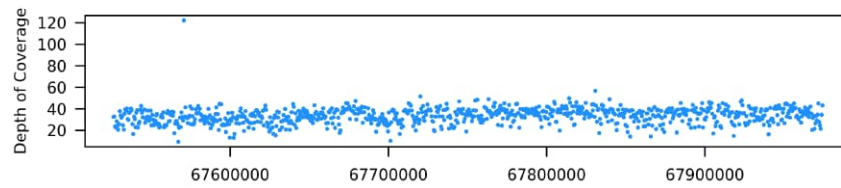

### d31

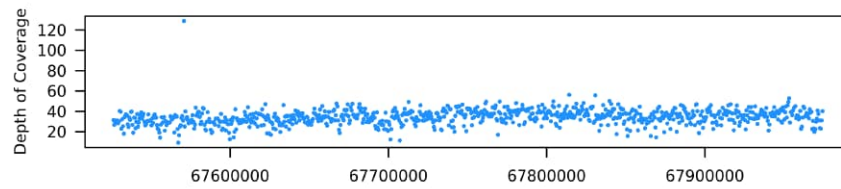

### d32

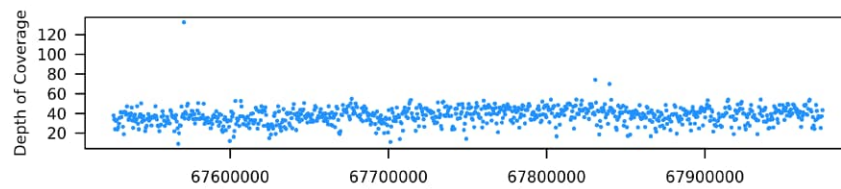

### 100522280 TBX5

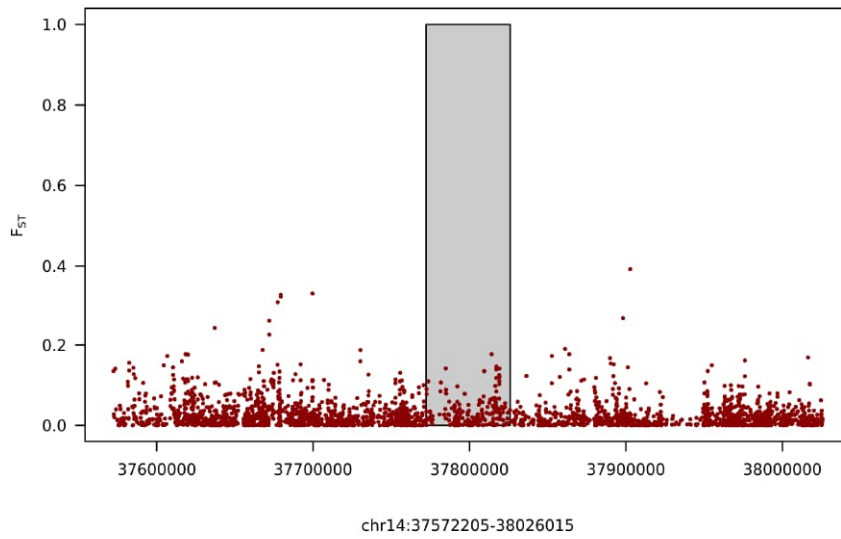

### Seizure

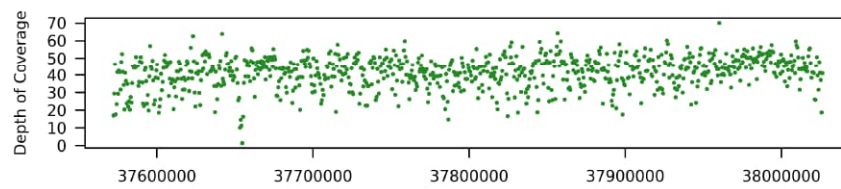

### d21

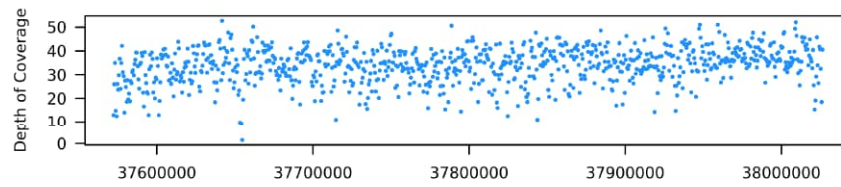

### d22

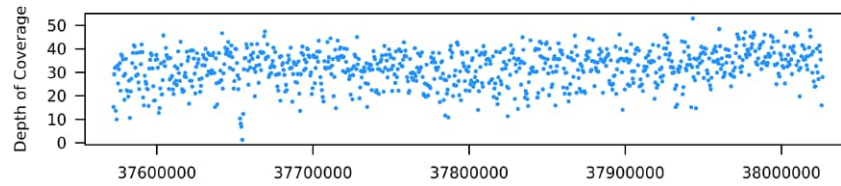

### d31

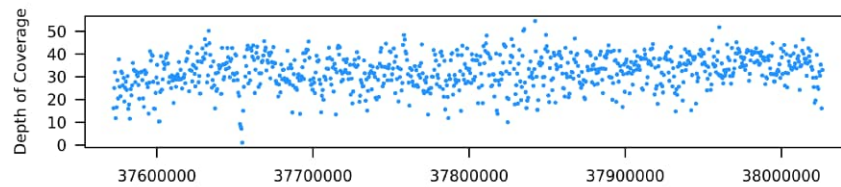

### d32

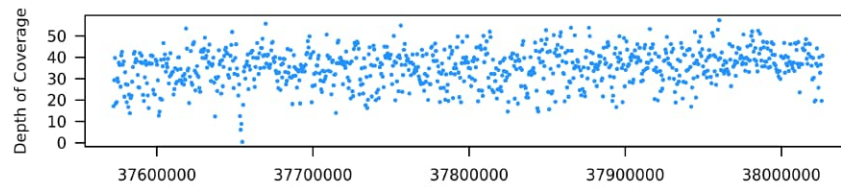

# 100522340 RNF157

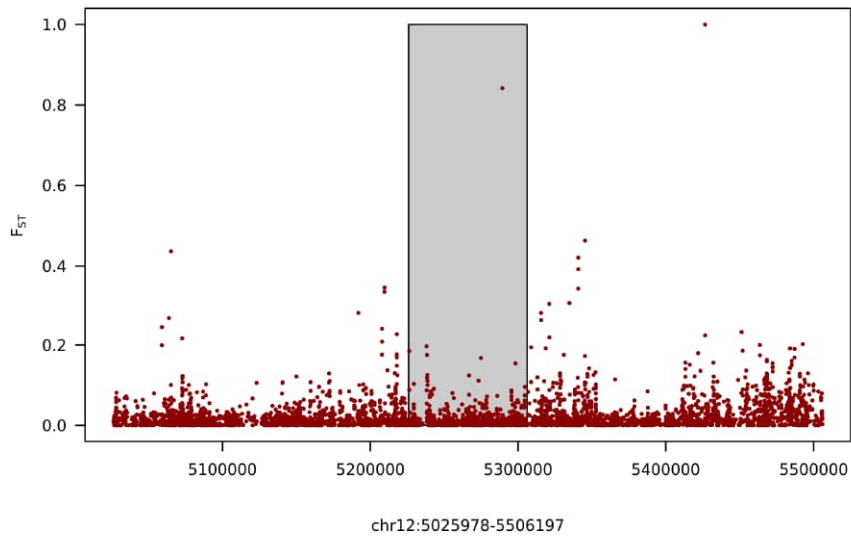

## Seizure

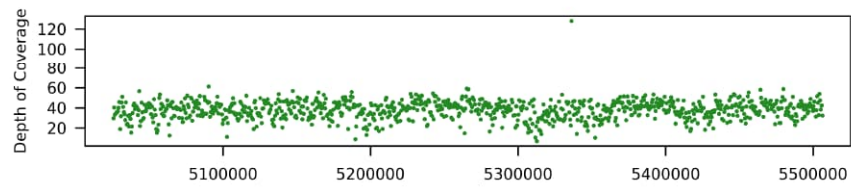

## d21

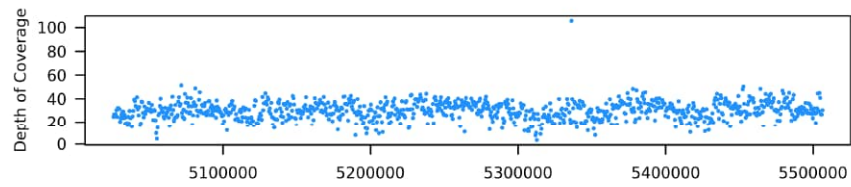

## d22

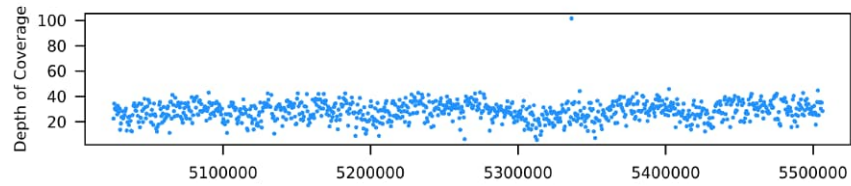

## d31

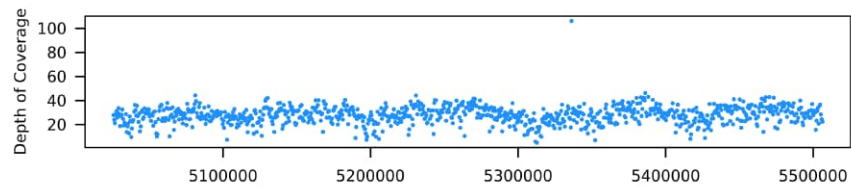

## d32

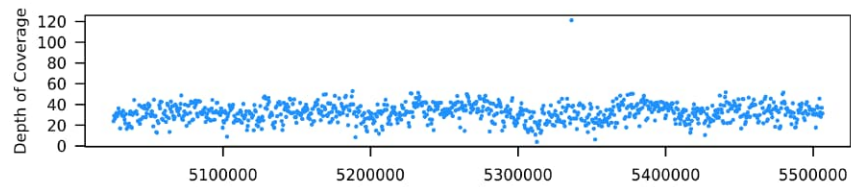

### 100522700 HOXB5

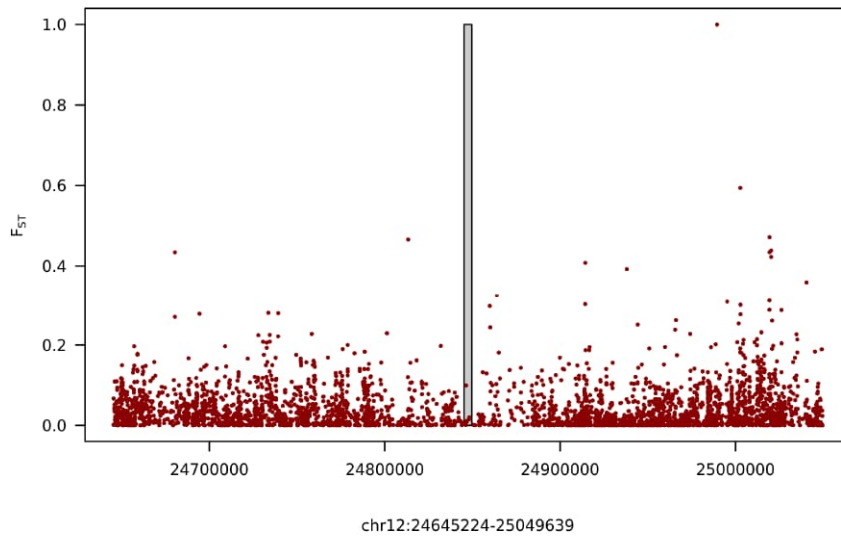

### Seizure

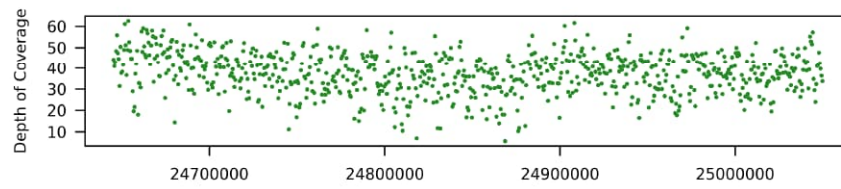

### d21

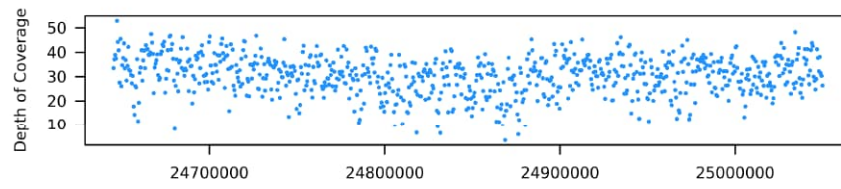

### d22

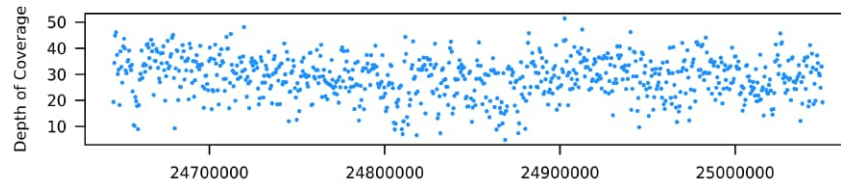

### d31

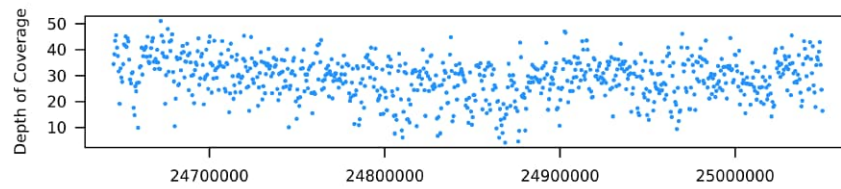

### d32

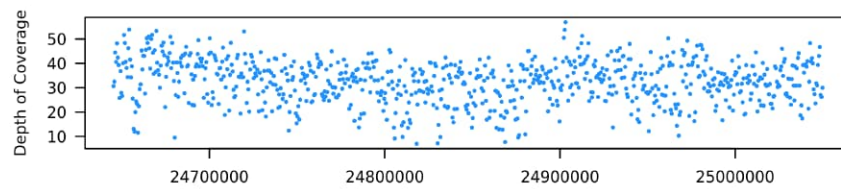



**100522769 CCN5**

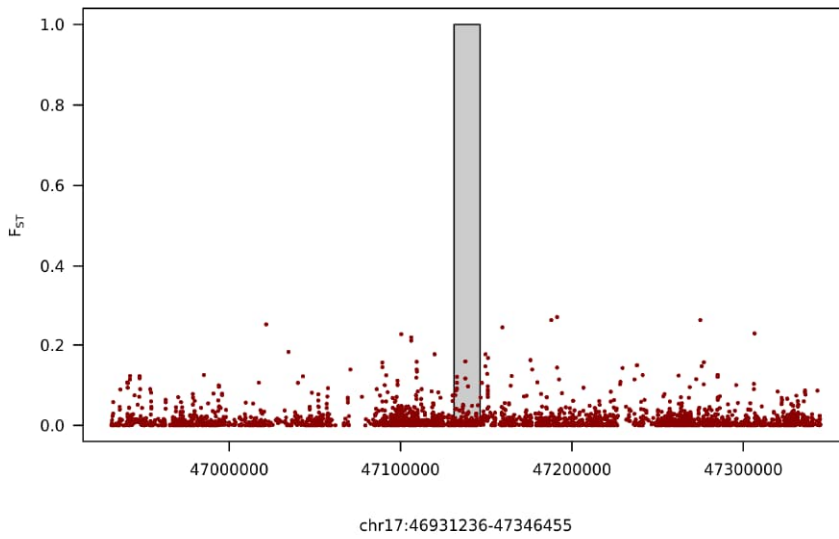

**Seizure**

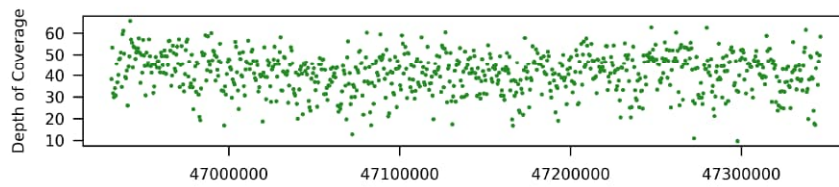

**d21**

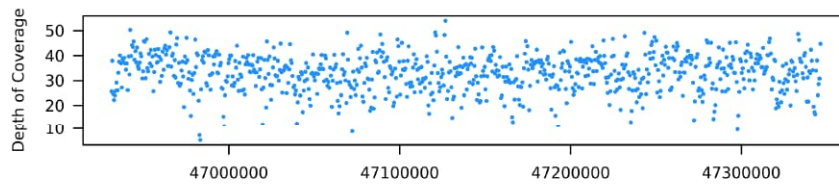

**d22**

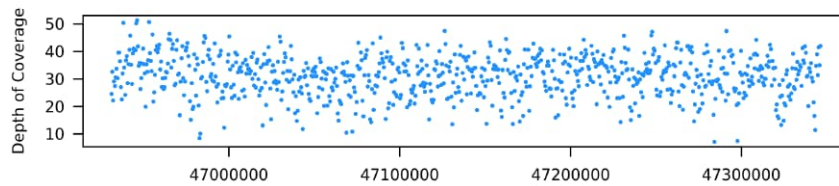

**d31**

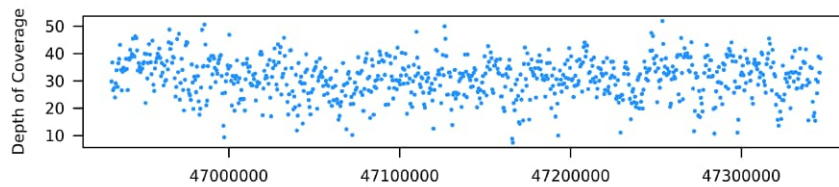

**d32**

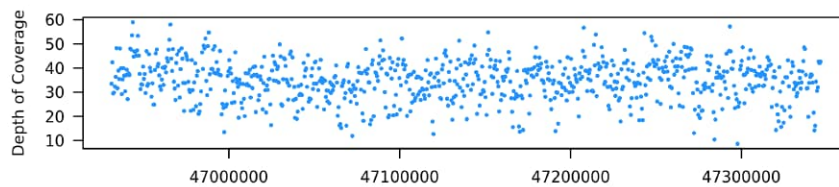

### 100524798 DNAH6

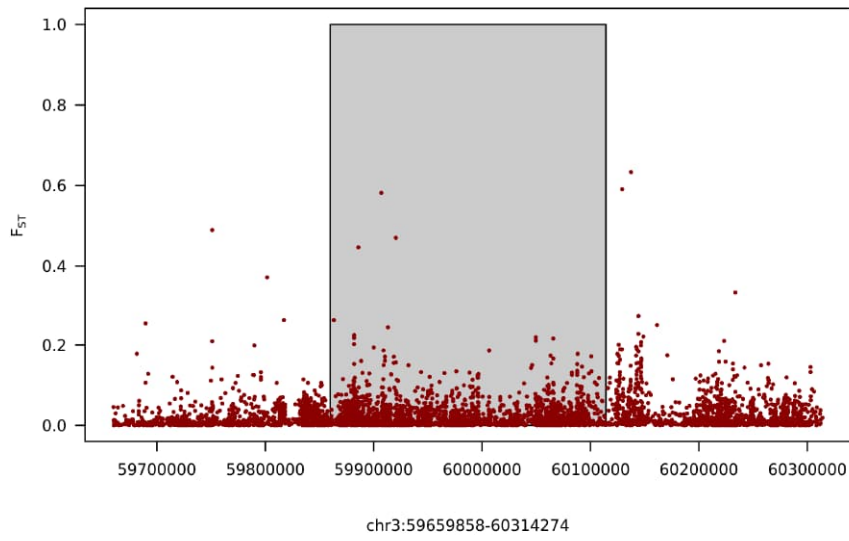

### Seizure

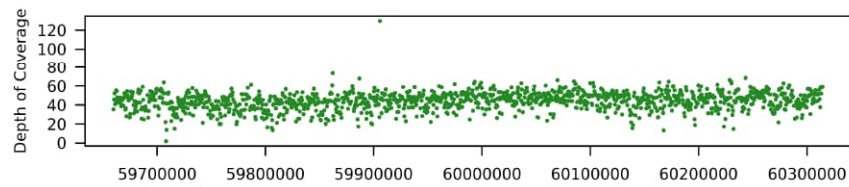

### d21

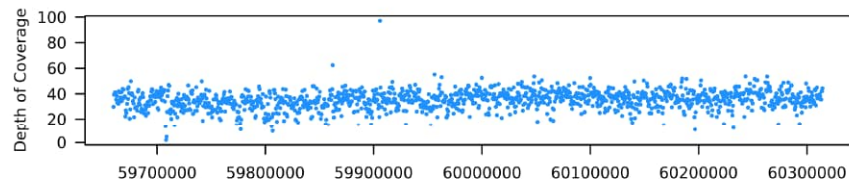

### d22

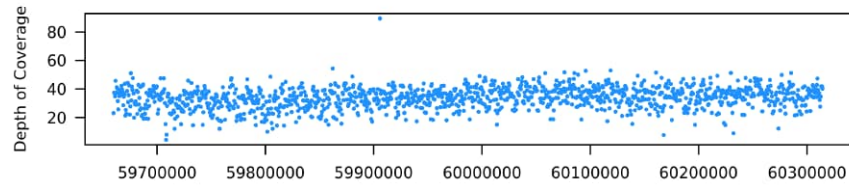

### d31

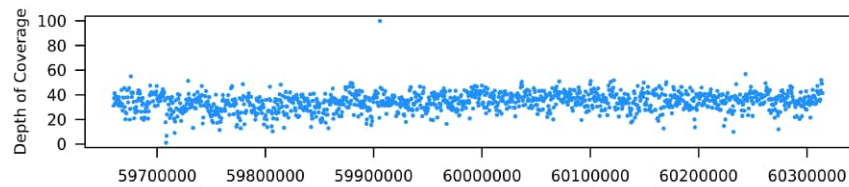

### d32

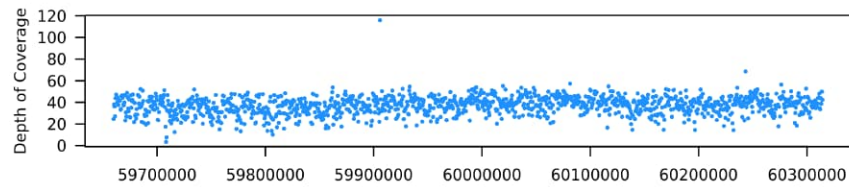

# 100524960 DYDC1

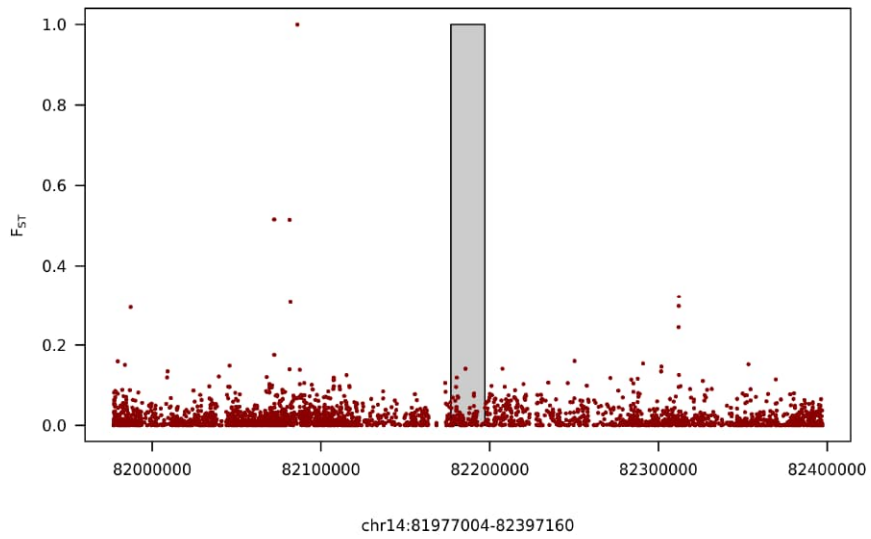

## Seizure

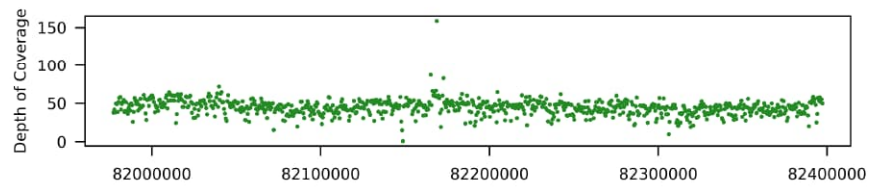

## d21

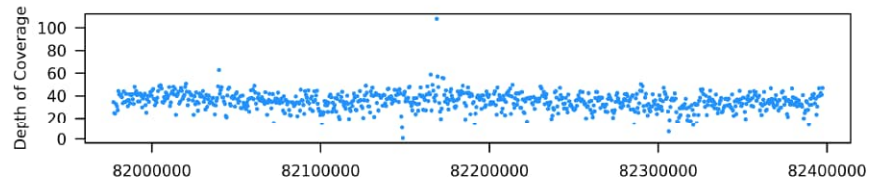

## d22

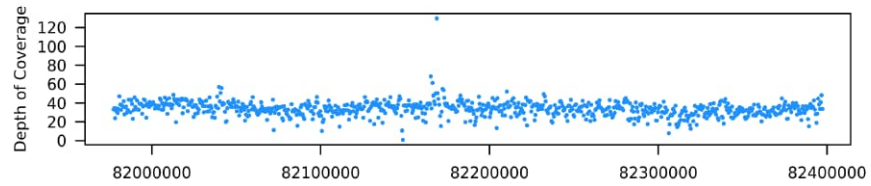

## d31

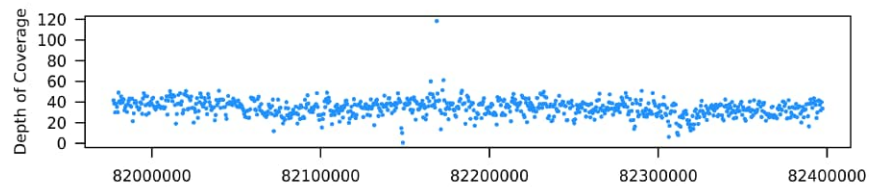

## d32

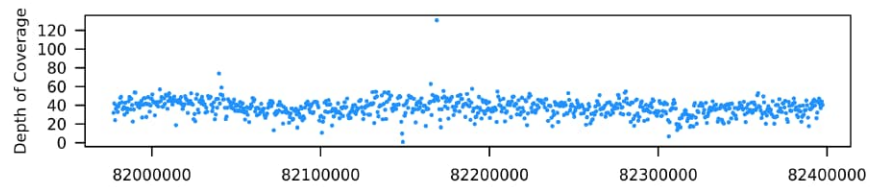

### 100525601 VASH2

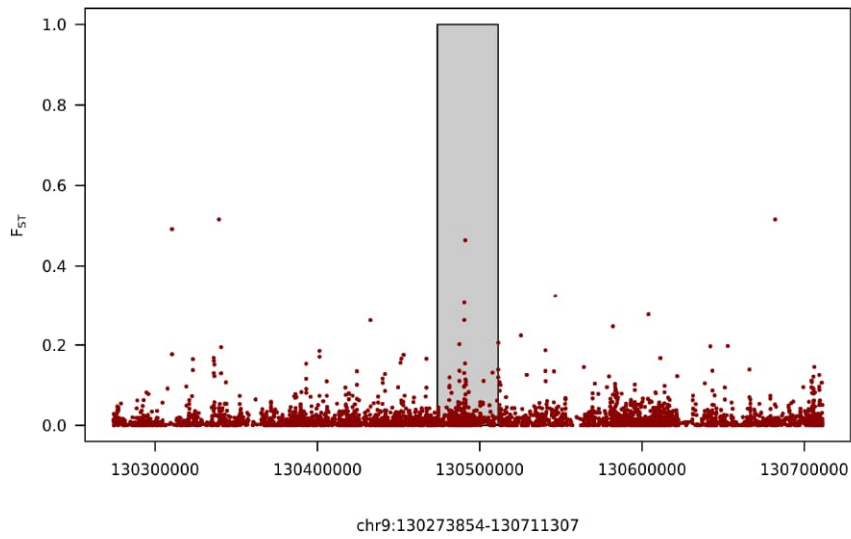

### Seizure

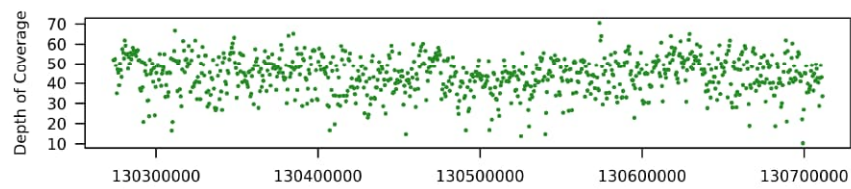

### d21

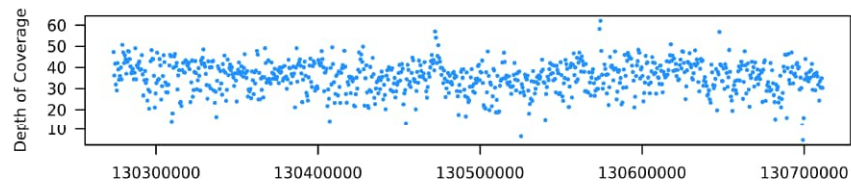

### d22

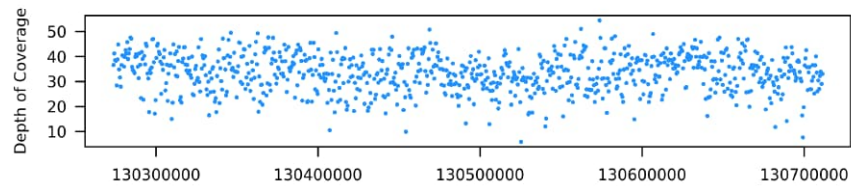

### d31

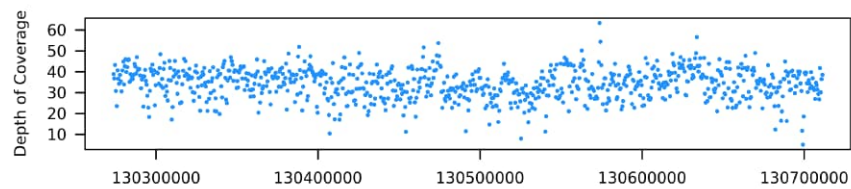

### d32

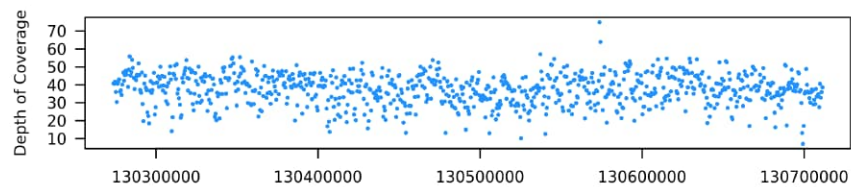

### 100620350 CHR

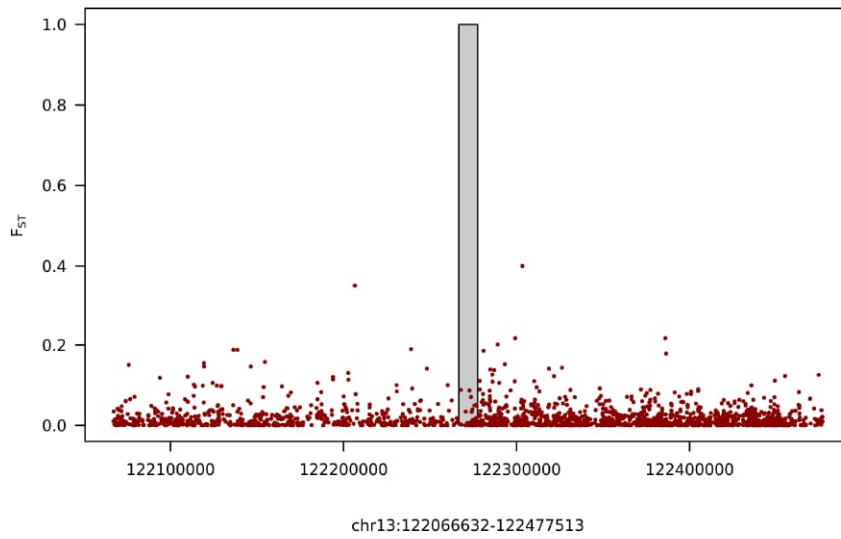

### Seizure

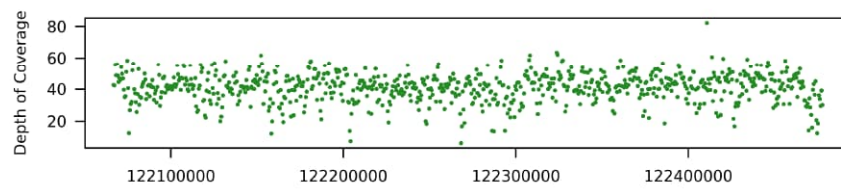

### d21

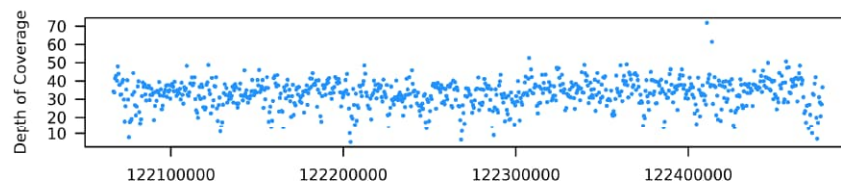

### d22

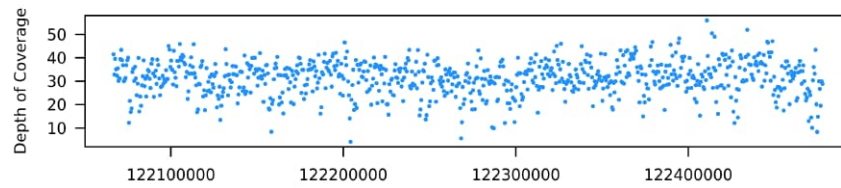

### d31

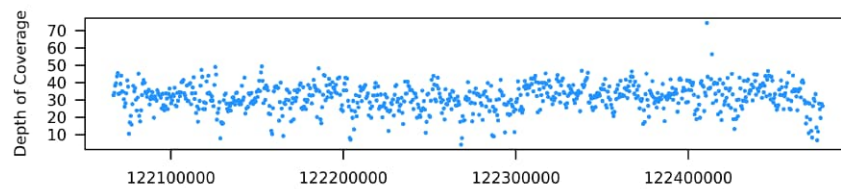

### d32

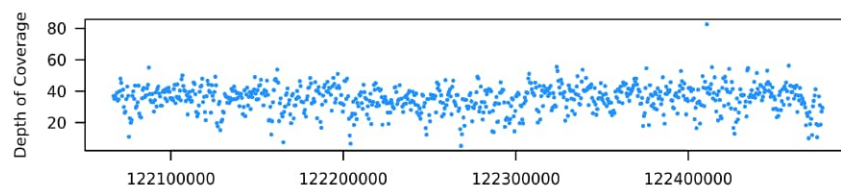



# 100623340 GPRC5B

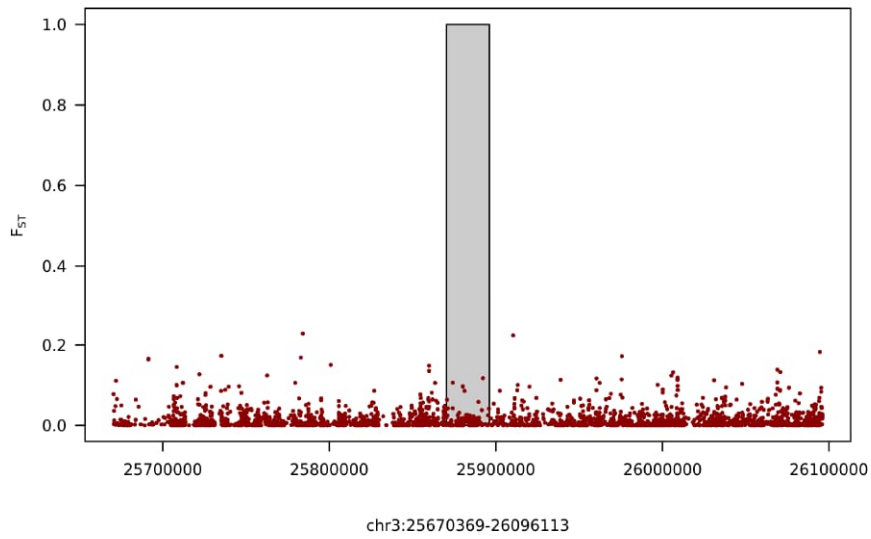

## Seizure

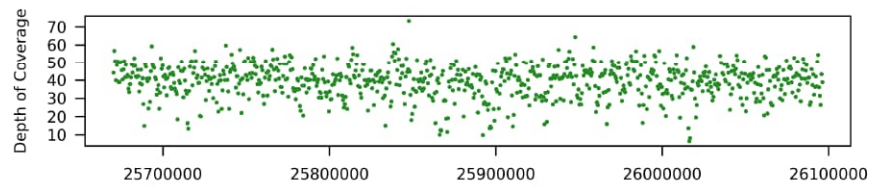

## d21

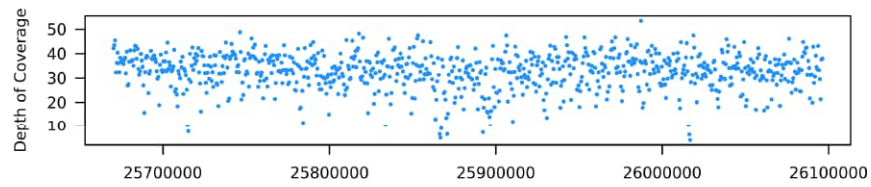

## d22

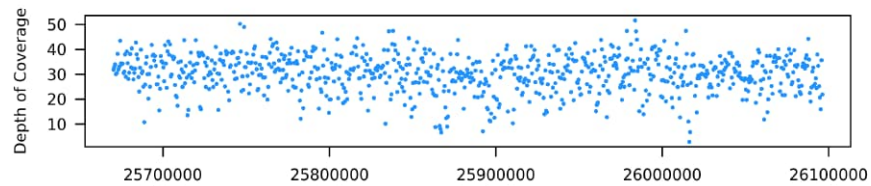

## d31

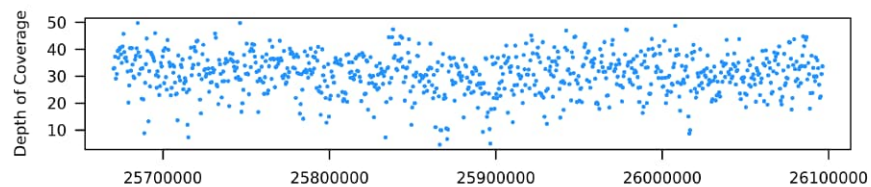

## d32

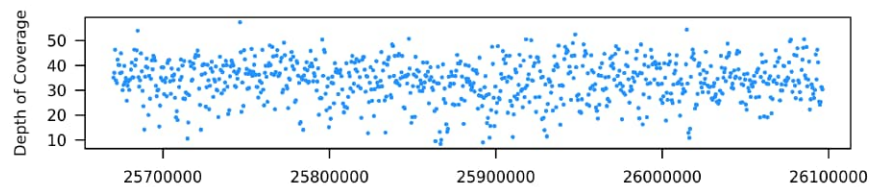

### 100623437 DSC3

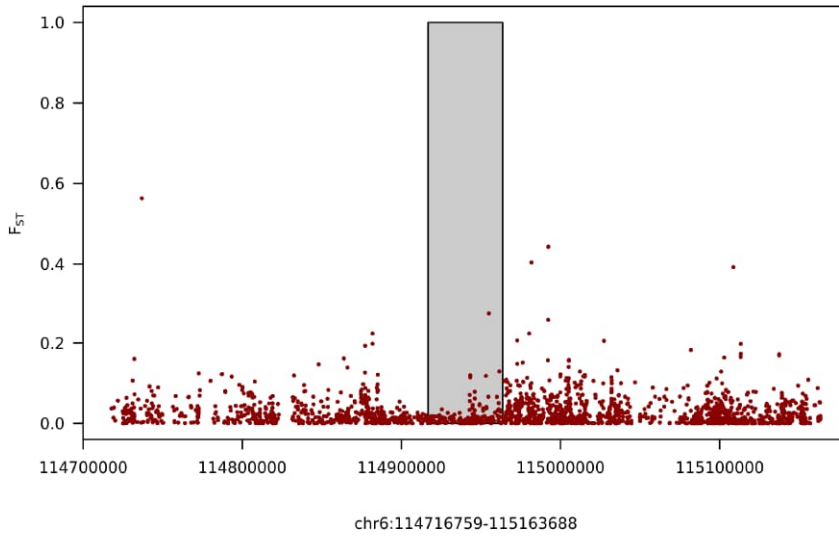

### Seizure

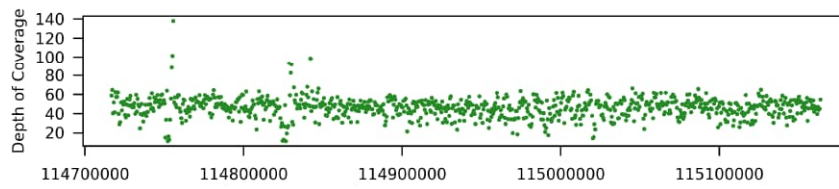

### d21

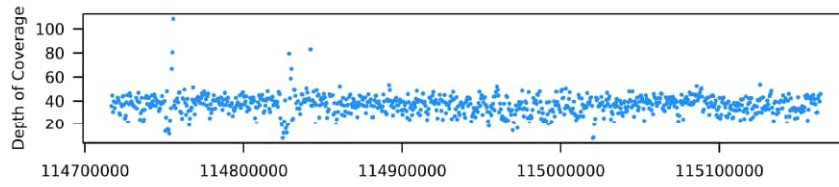

### d22

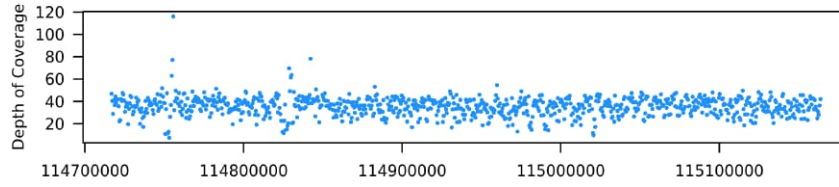

### d31

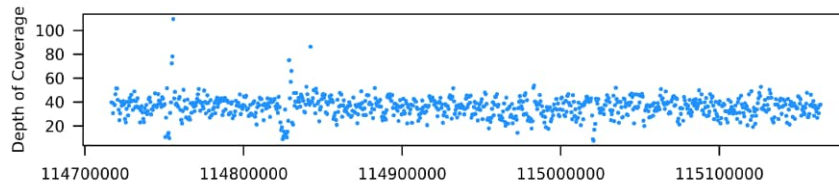

### d32

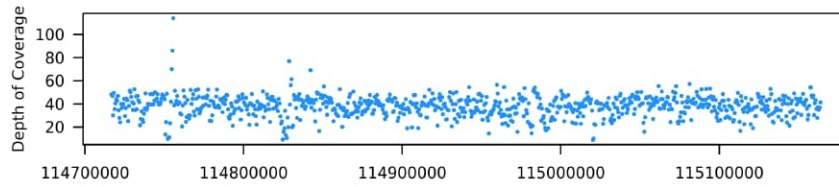

### 100623651 DSC2

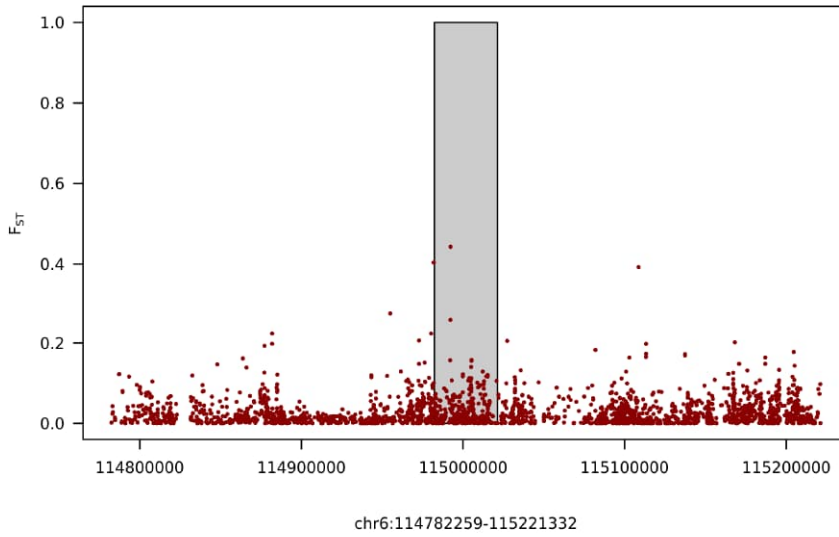

### Seizure

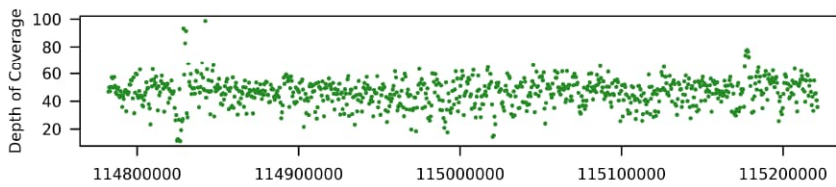

### d21

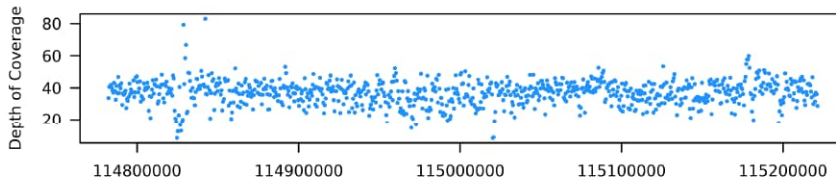

### d22

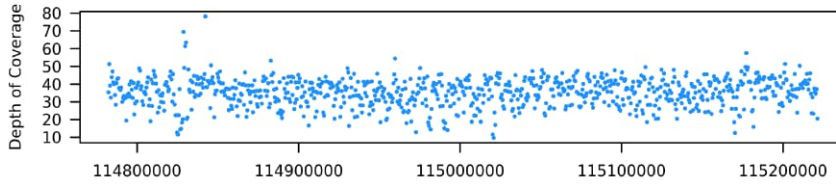

### d31

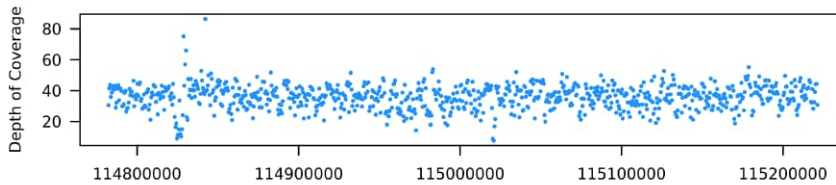

### d32

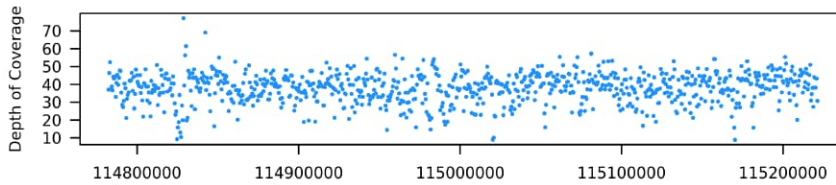

**100624867 PCBP3**

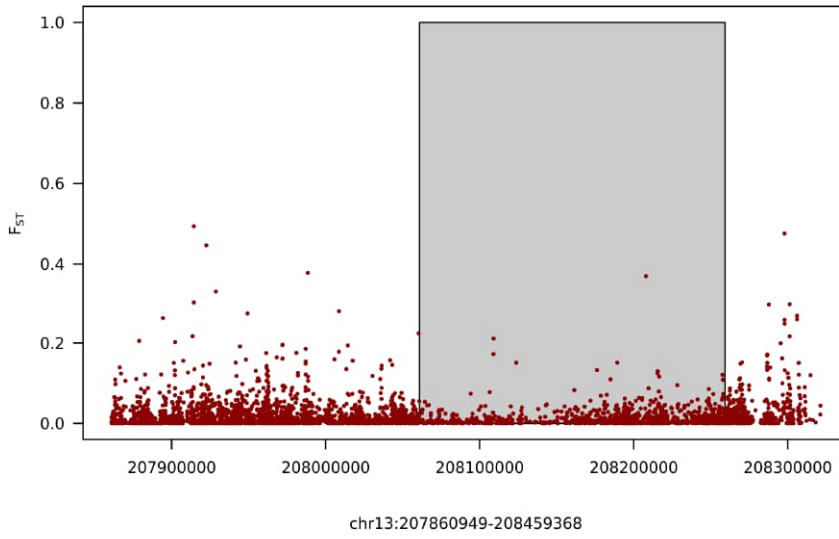

**Seizure**

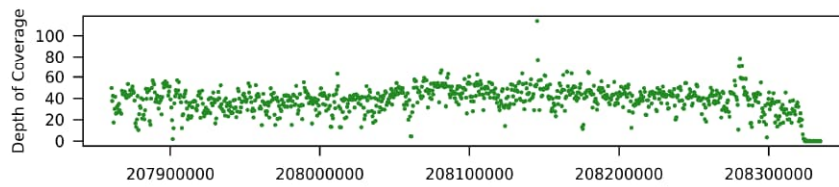

**d21**

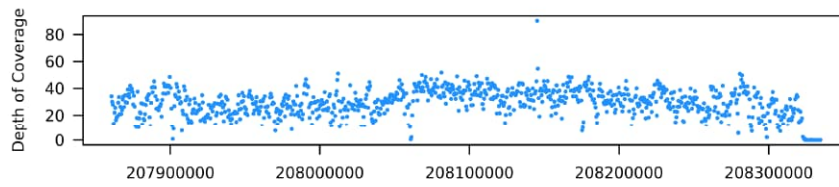

**d22**

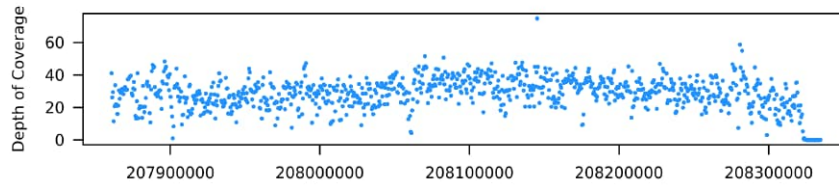

**d31**

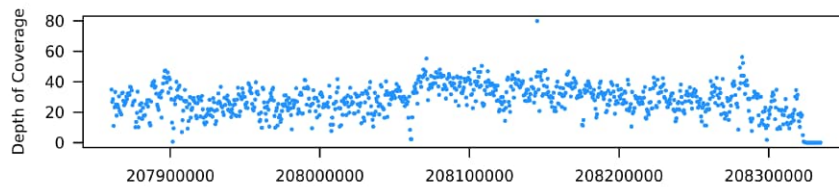

**d32**

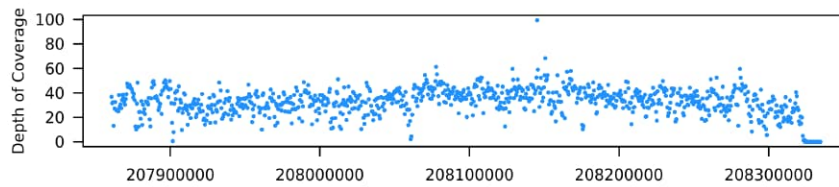

# 100625267 SYT12

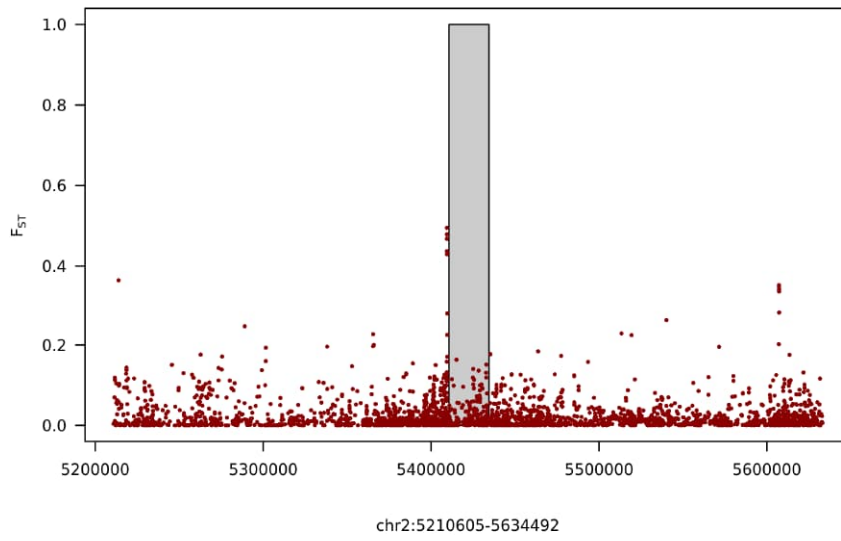

## Seizure

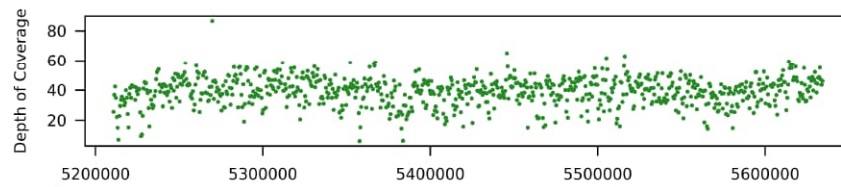

## d21

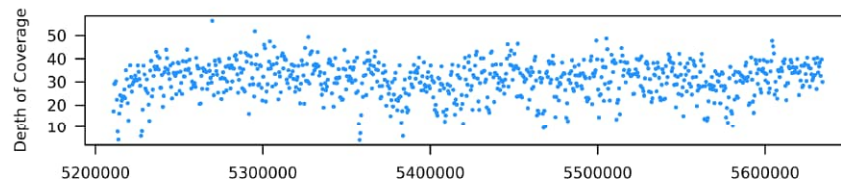

## d22

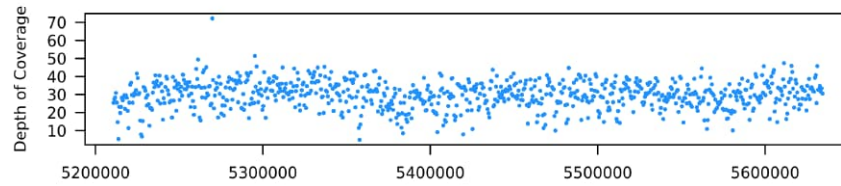

## d31

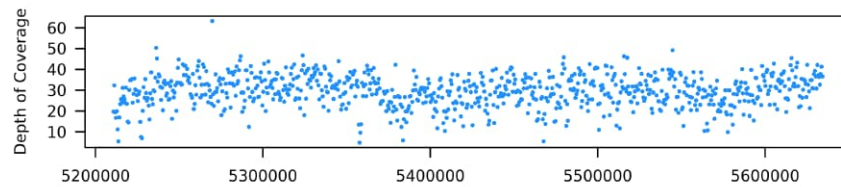

## d32

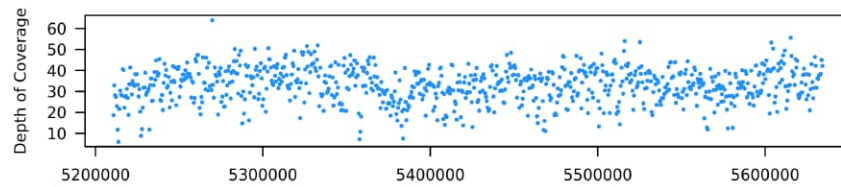



**100625290 ZBTB16**

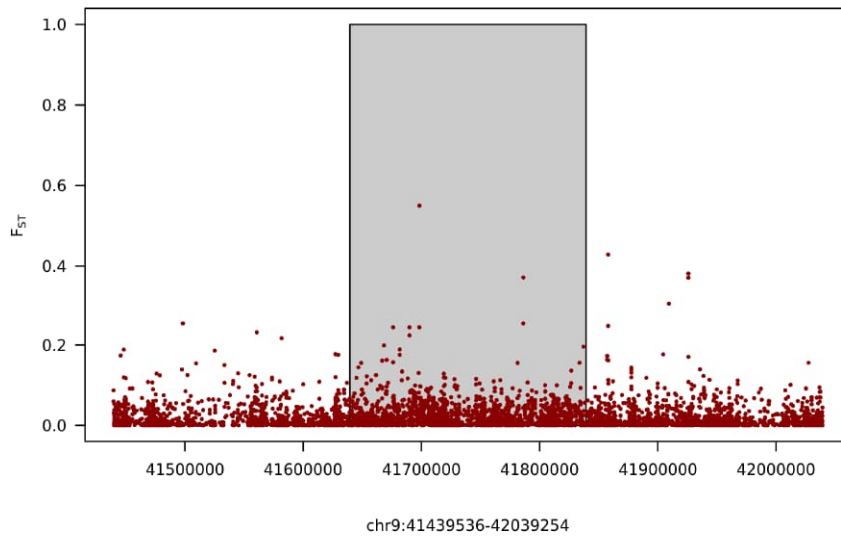

**Seizure**

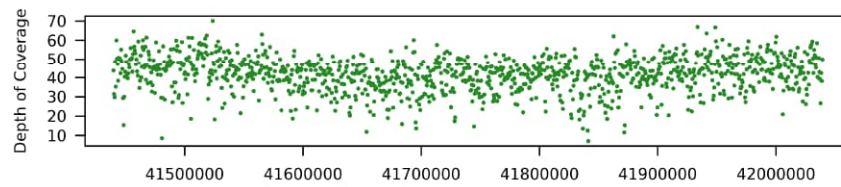

**d21**

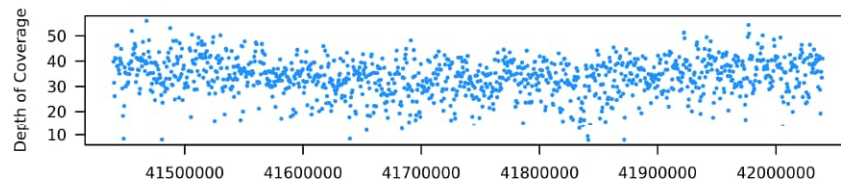

**d22**

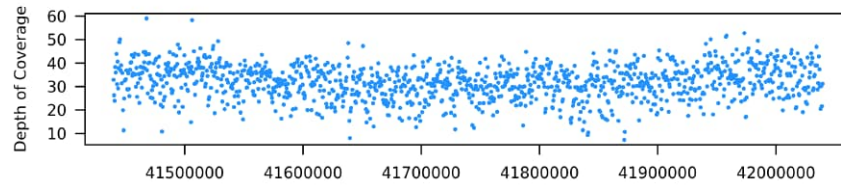

**d31**

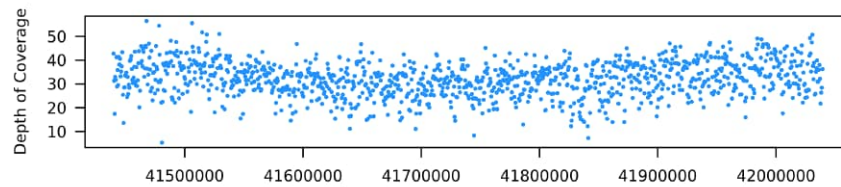

**d32**

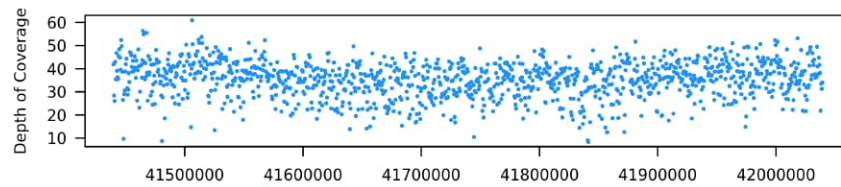

### 100625833 DSG2

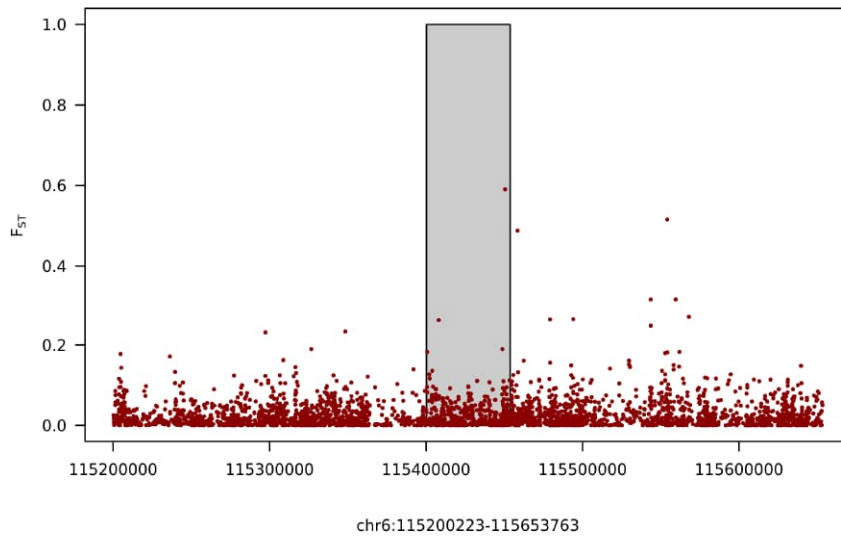

### Seizure

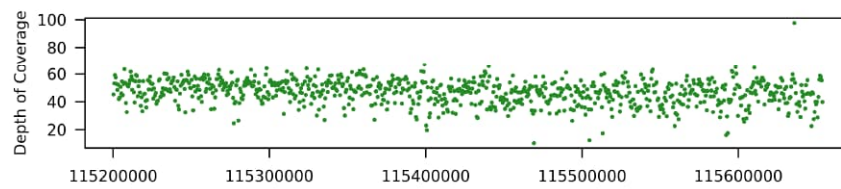

### d21

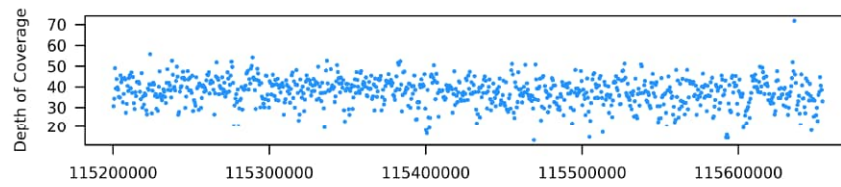

### d22

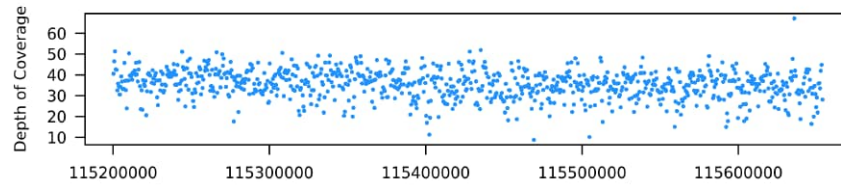

### d31

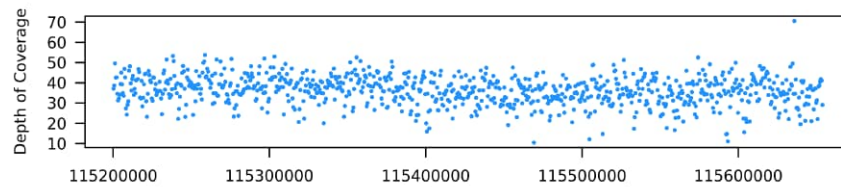

### d32

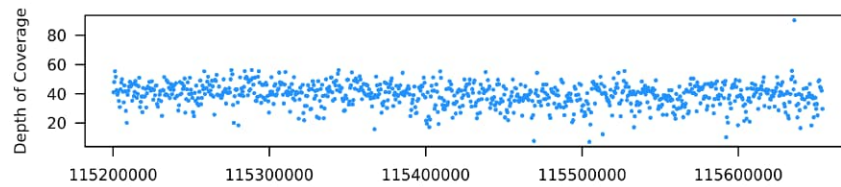

100627225 TMRSS7

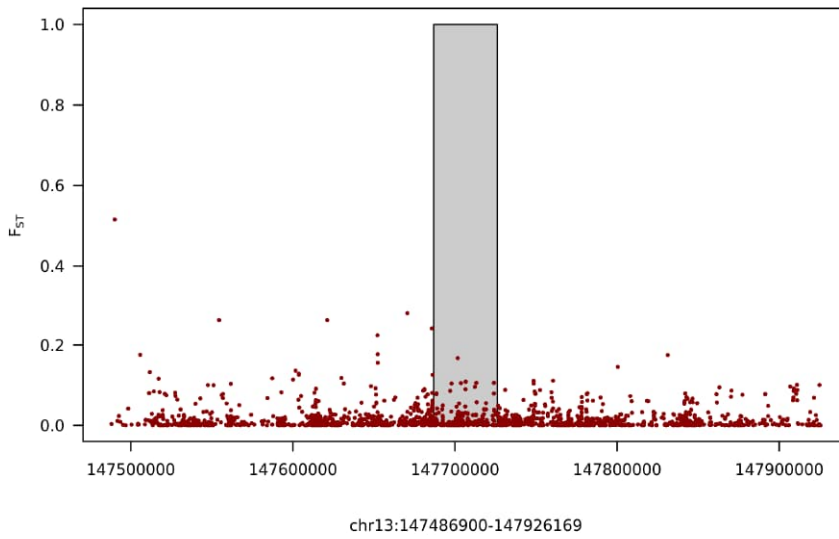

Seizure

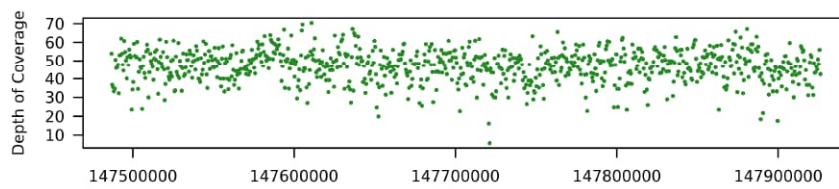

d21

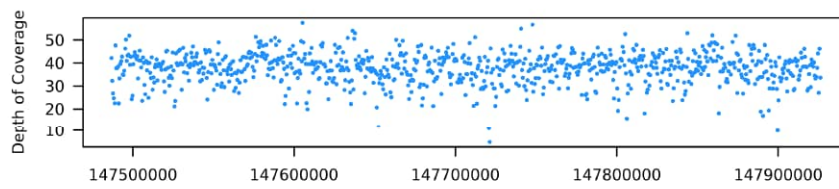

d22

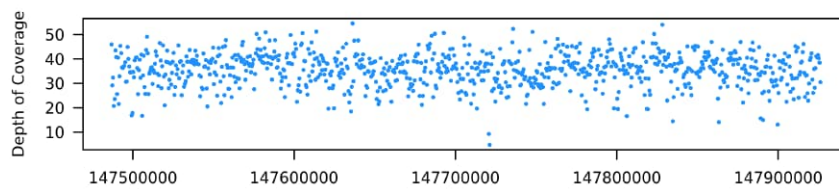

d31

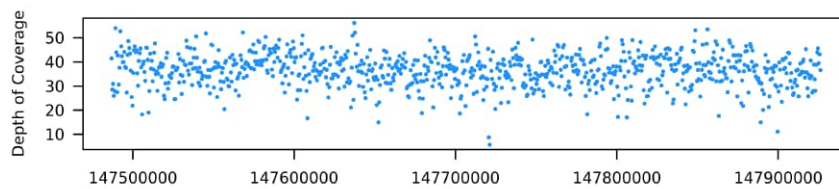

d32

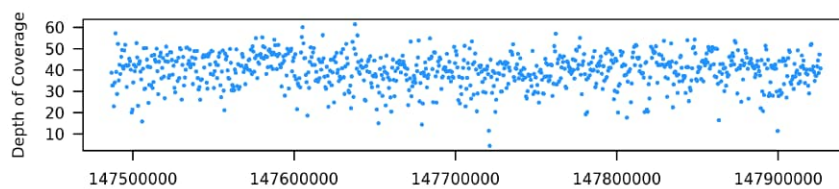

### 100627543 CD96

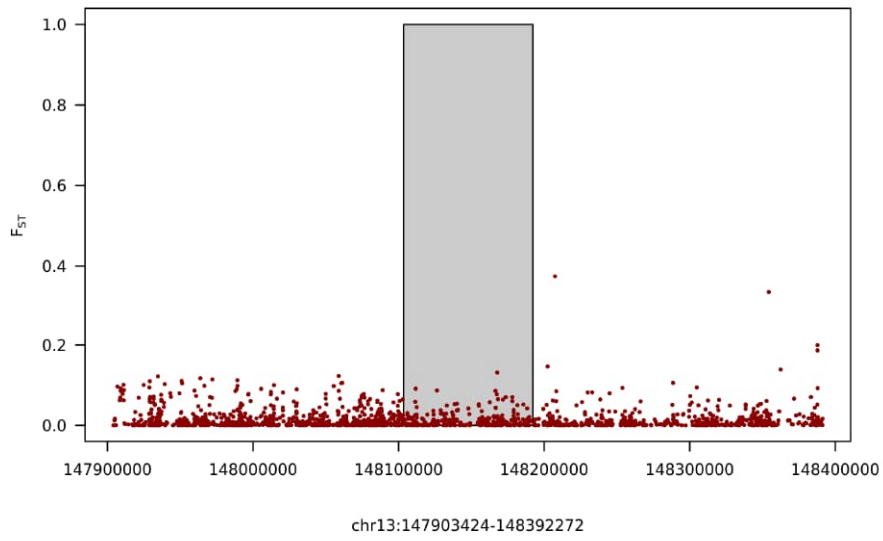

### Seizure

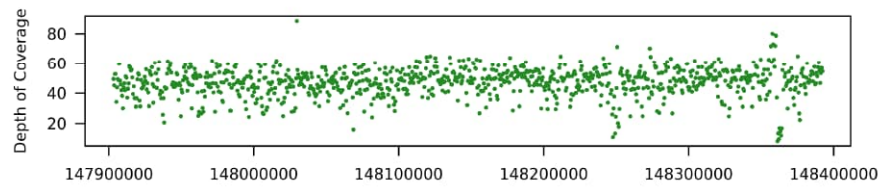

### d21

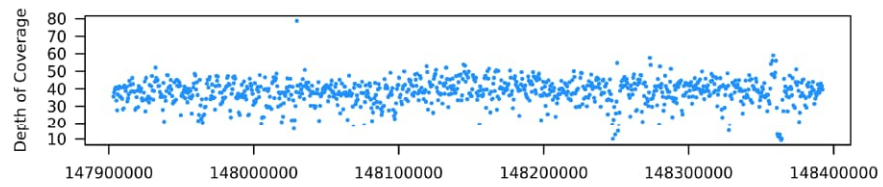

### d22

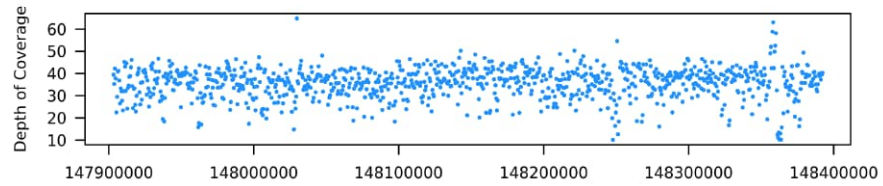

### d31

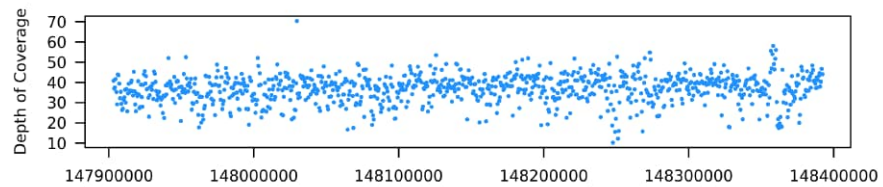

### d32

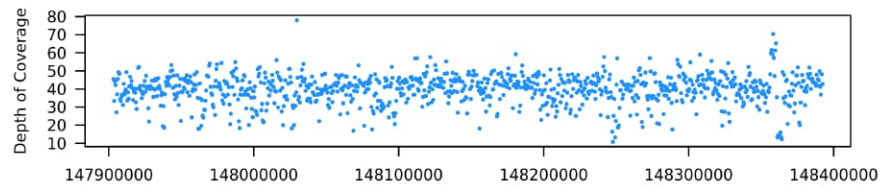



100627849 HOXB6

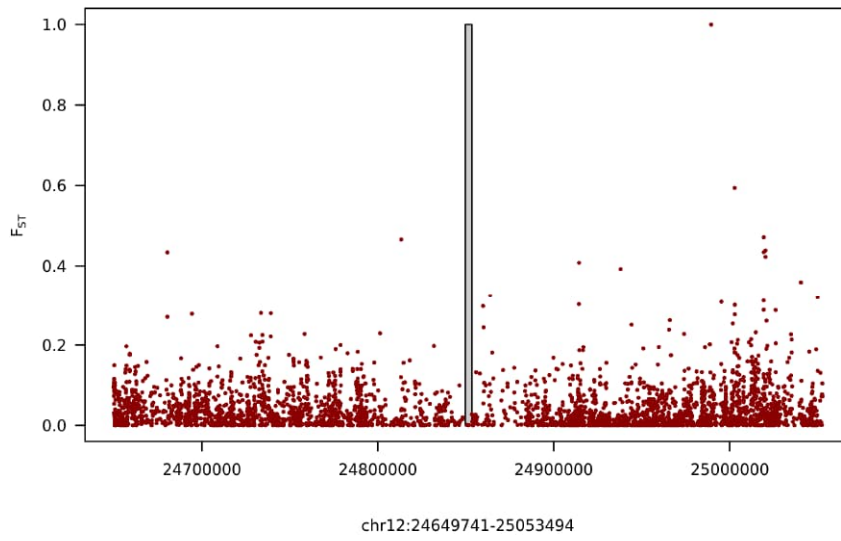

Seizure

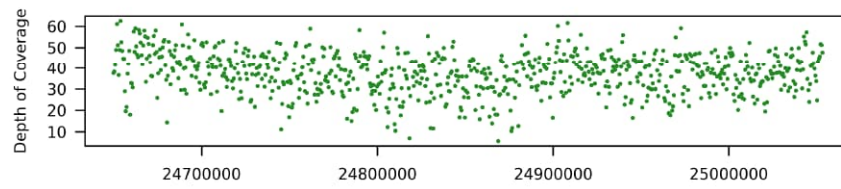

d21

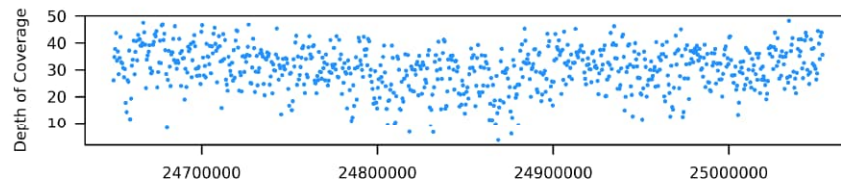

d22

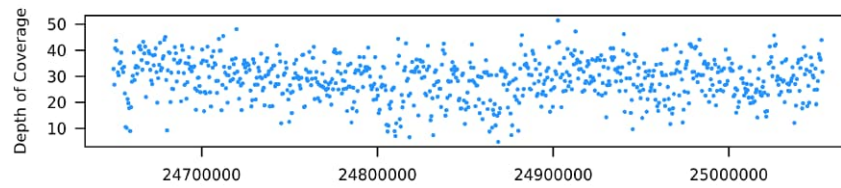

d31

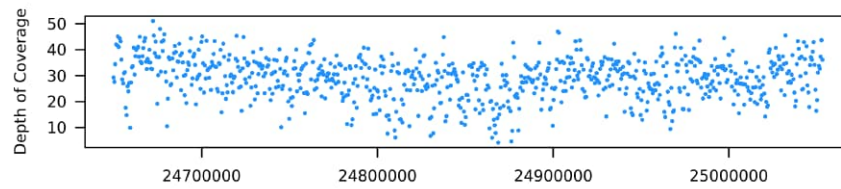

d32

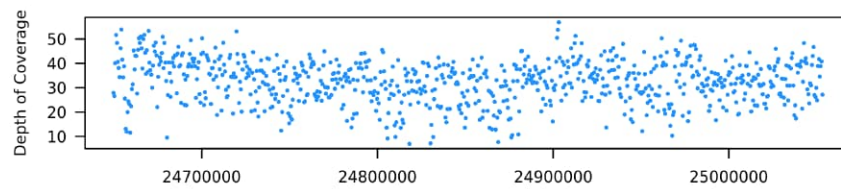



### 100736572 FAP

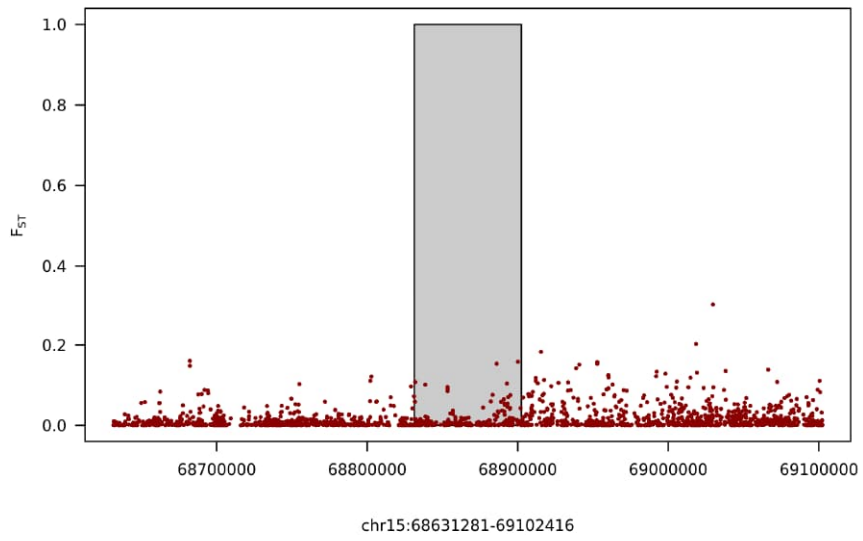

### Seizure

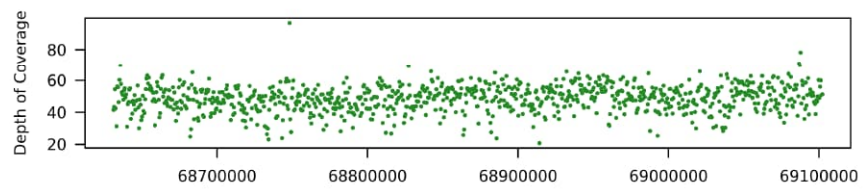

### d21

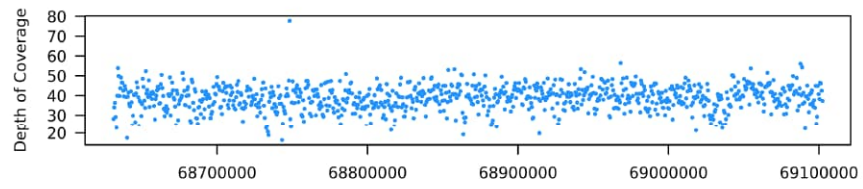

### d22

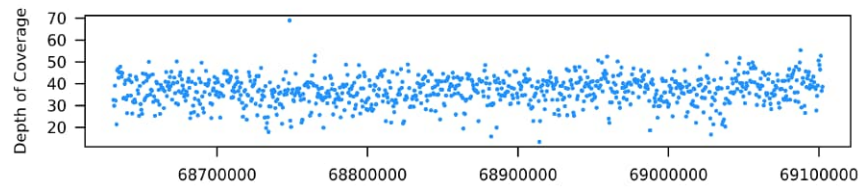

### d31

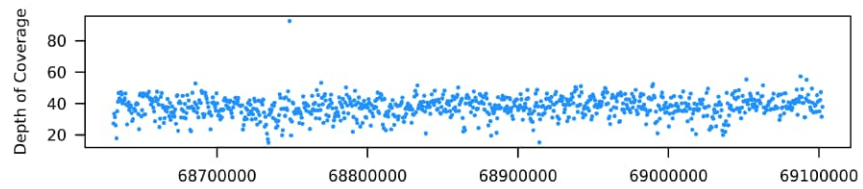

### d32

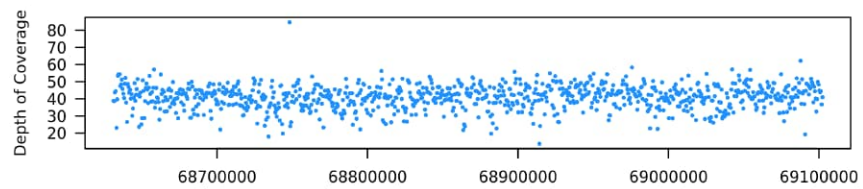

# 100738475 MACROH2A2

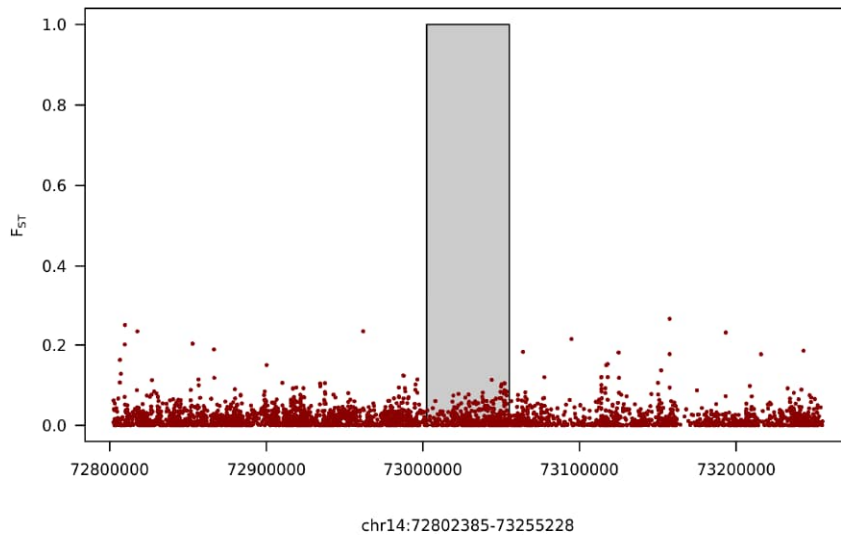

## Seizure

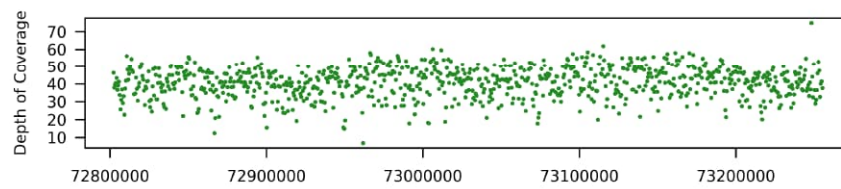

## d21

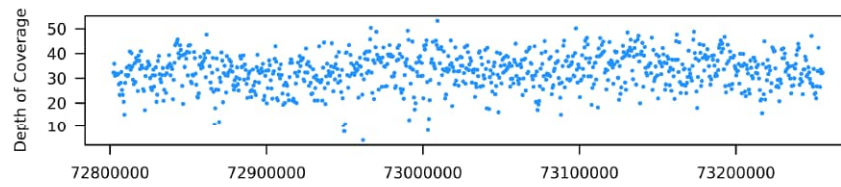

## d22

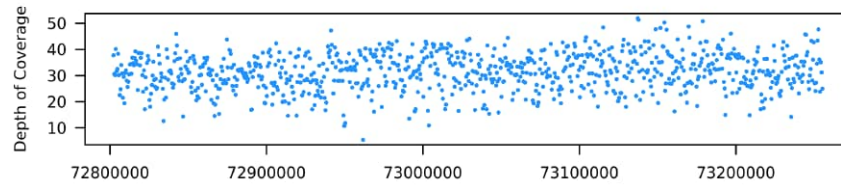

## d31

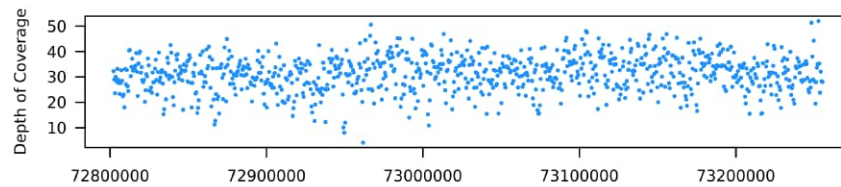

## d32

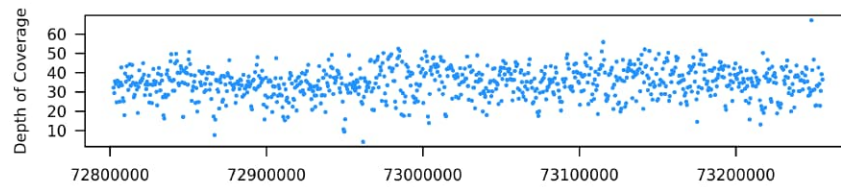

### 100739658 CFAP44

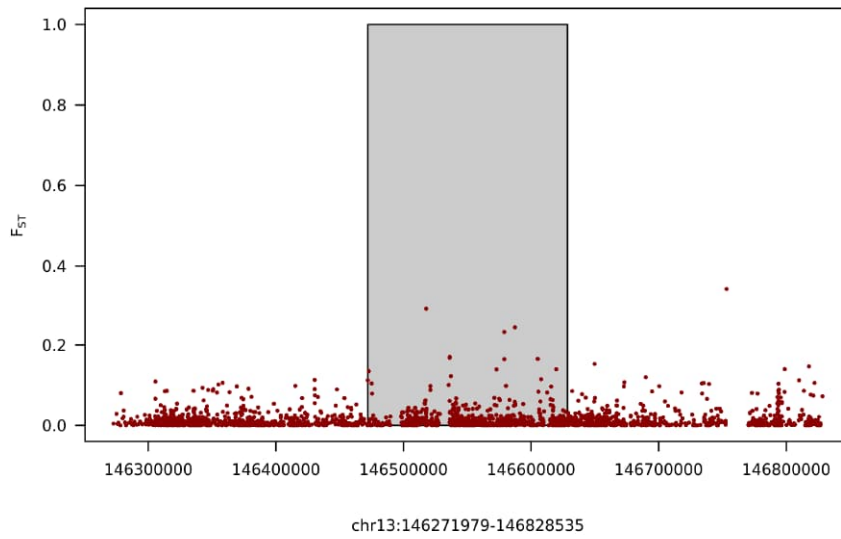

### Seizure

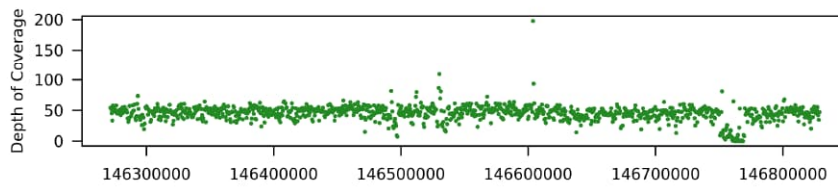

### d21

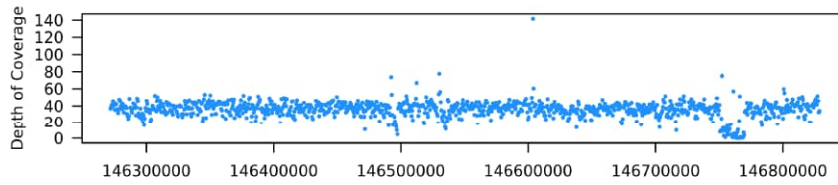

### d22

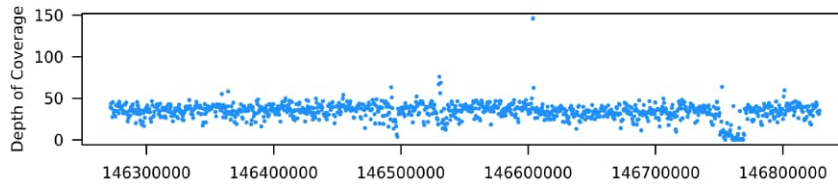

### d31

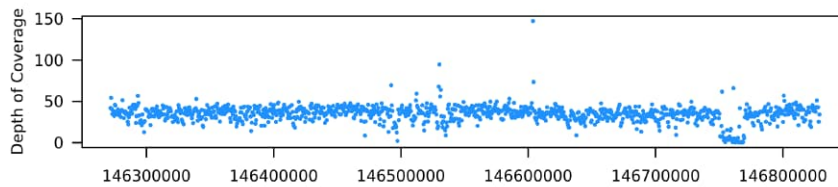

### d32

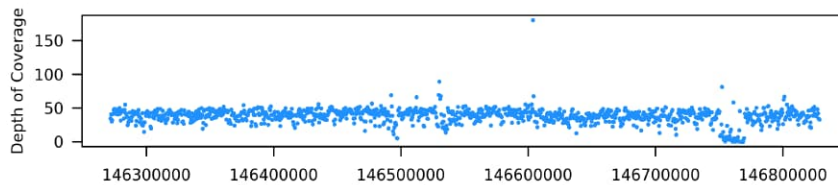

# 102158777 SPECC1

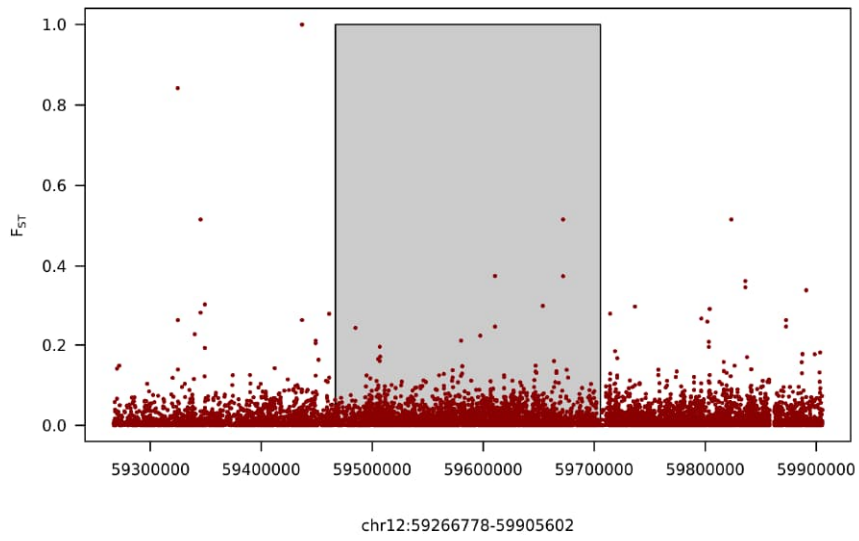

## Seizure

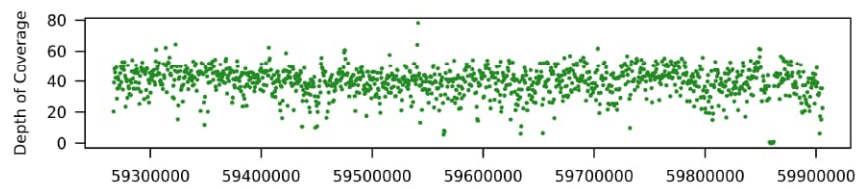

## d21

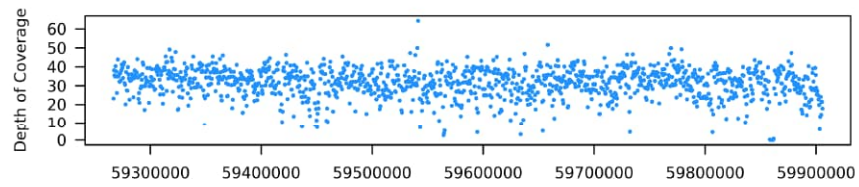

## d22

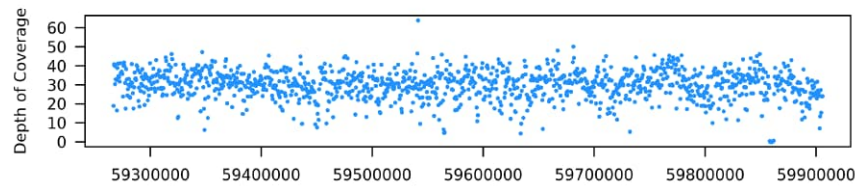

## d31

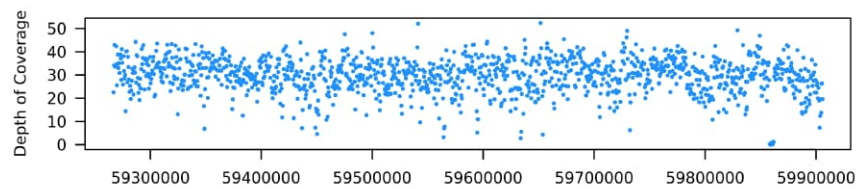

## d32

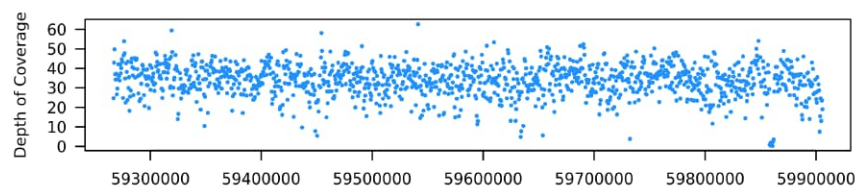

# 102161907 CROCC2

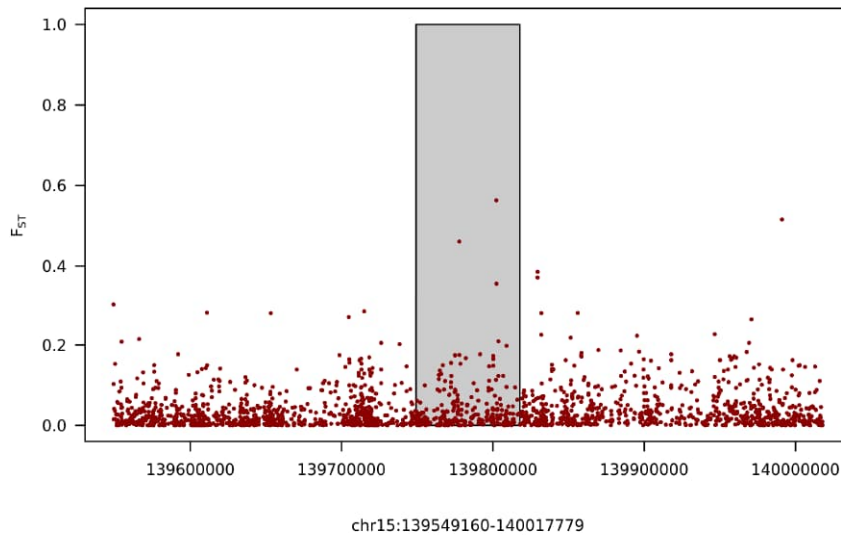

## Seizure

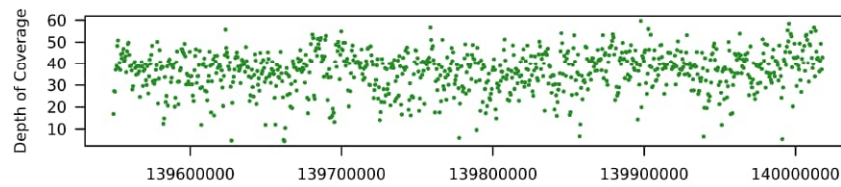

## d21

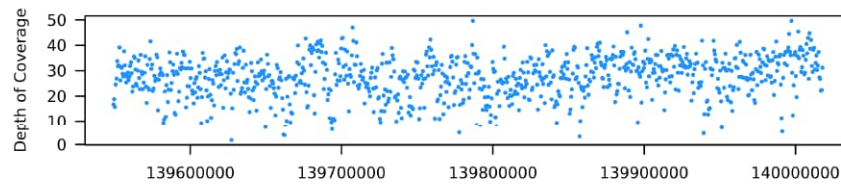

## d22

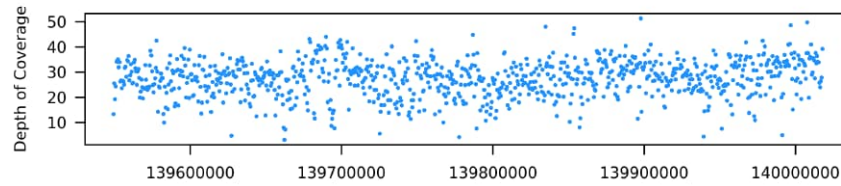

## d31

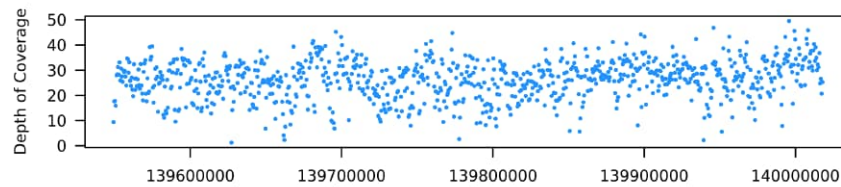

## d32

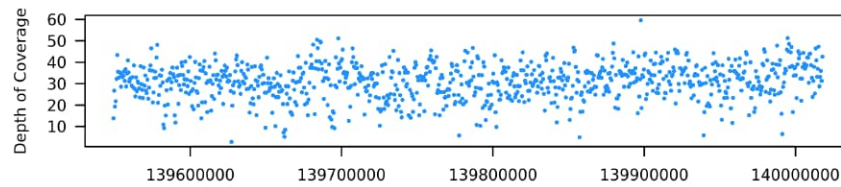



102163473 LOC102163473

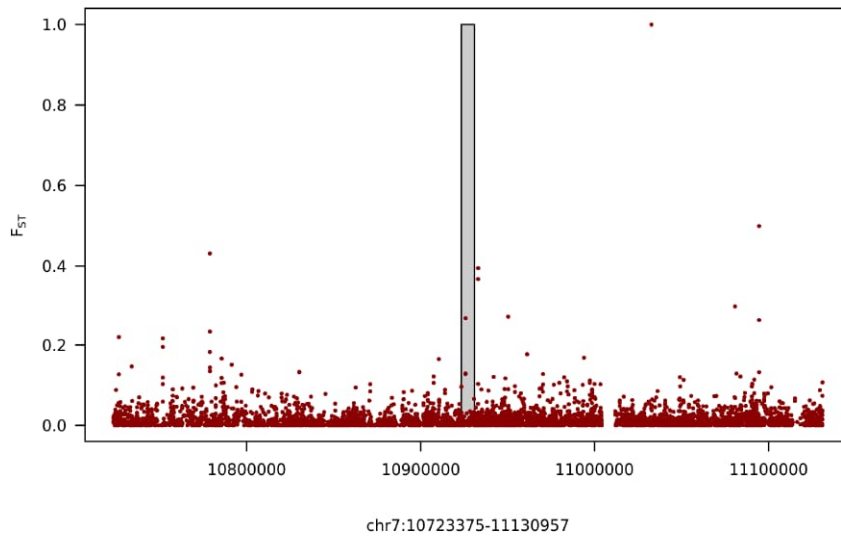

Seizure

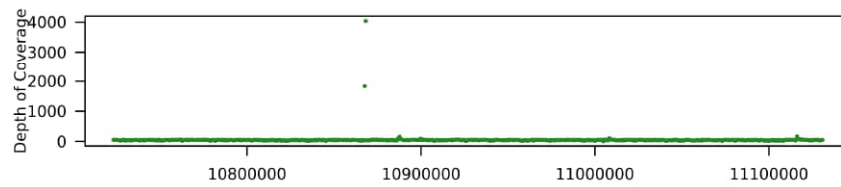

d21

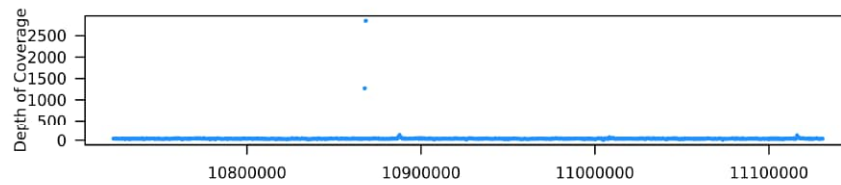

d22

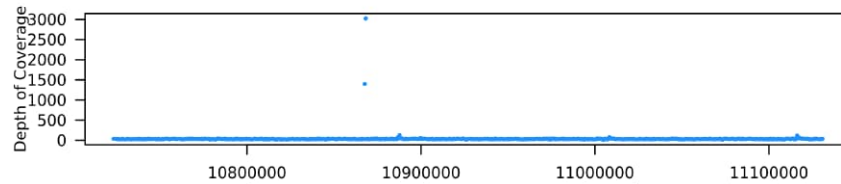

d31

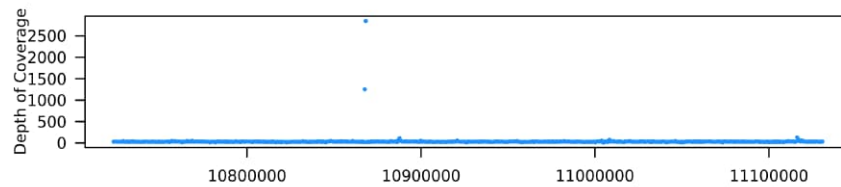

d32

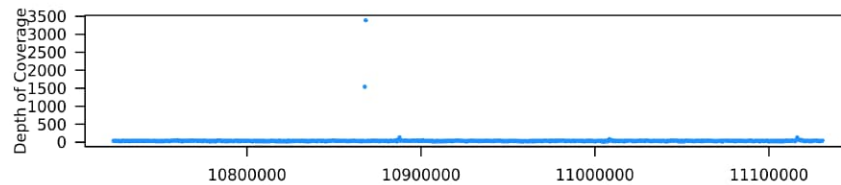

102165730 LOC102165730

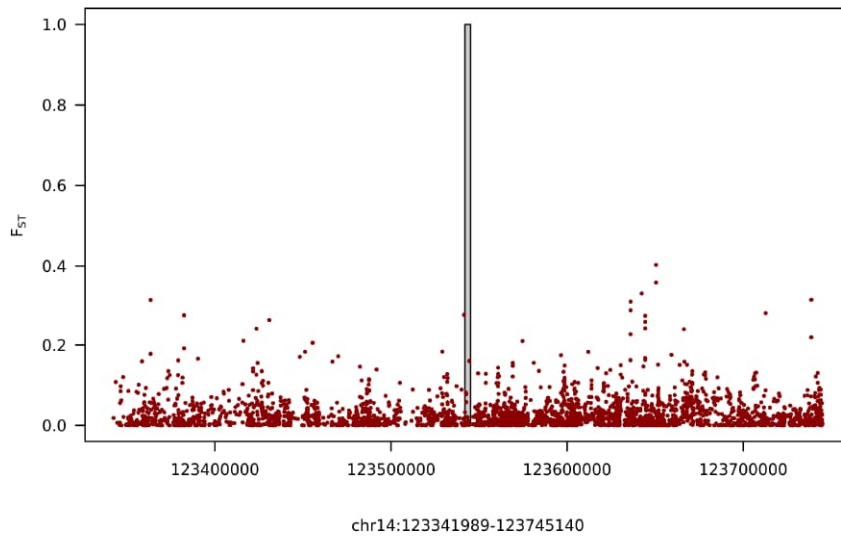

Seizure

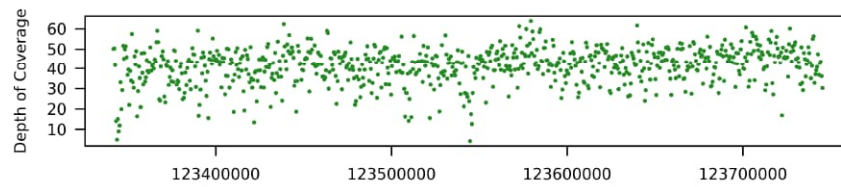

d21

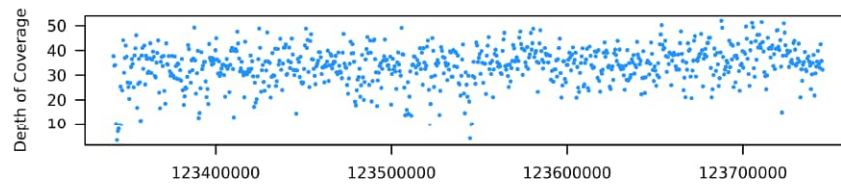

d22

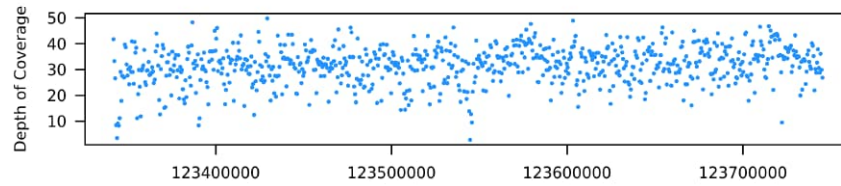

d31

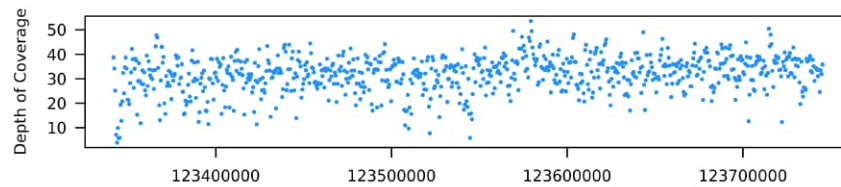

d32

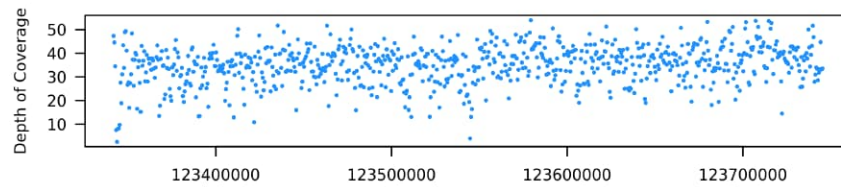

102166259 LOC102166259

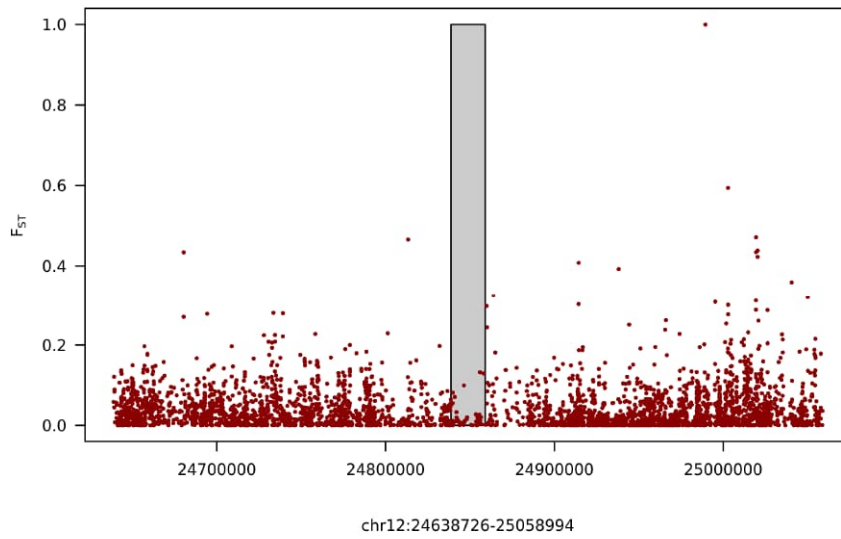

Seizure

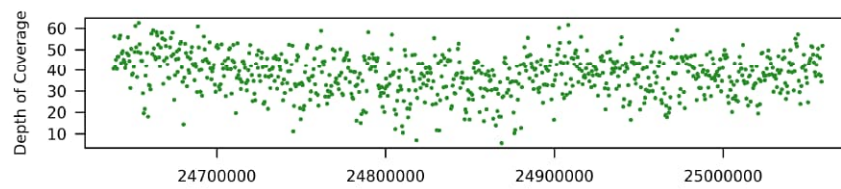

d21

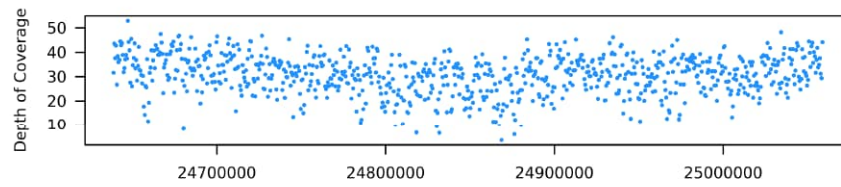

d22

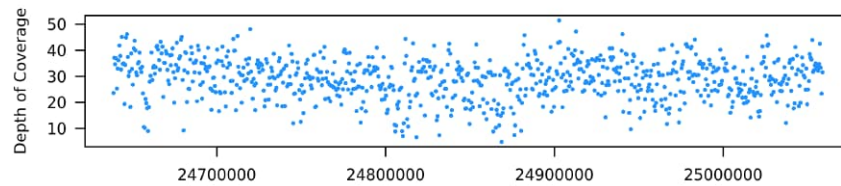

d31

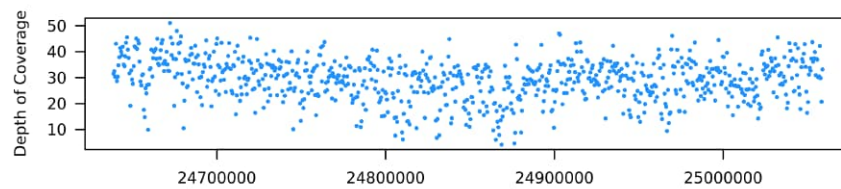

d32

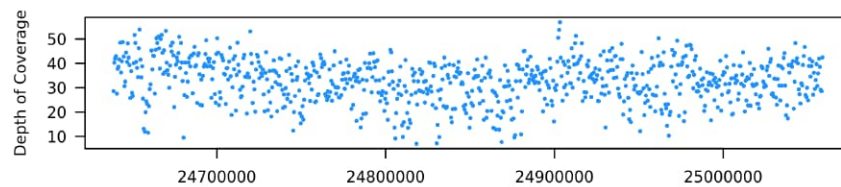

106506202 LOC106506202

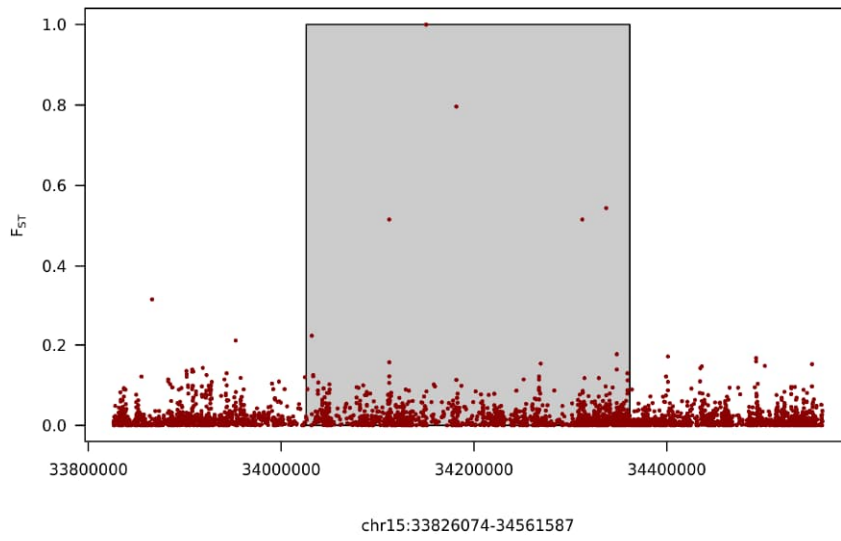

Seizure

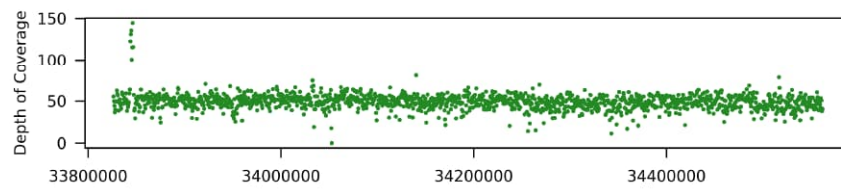

d21

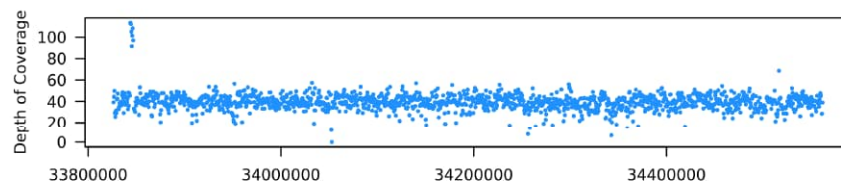

d22

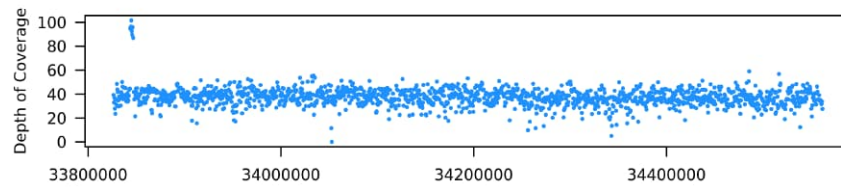

d31

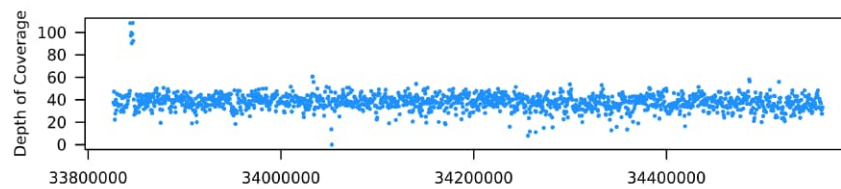

d32

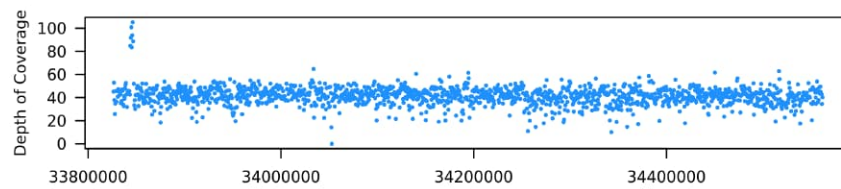

106510455 LOC106510455

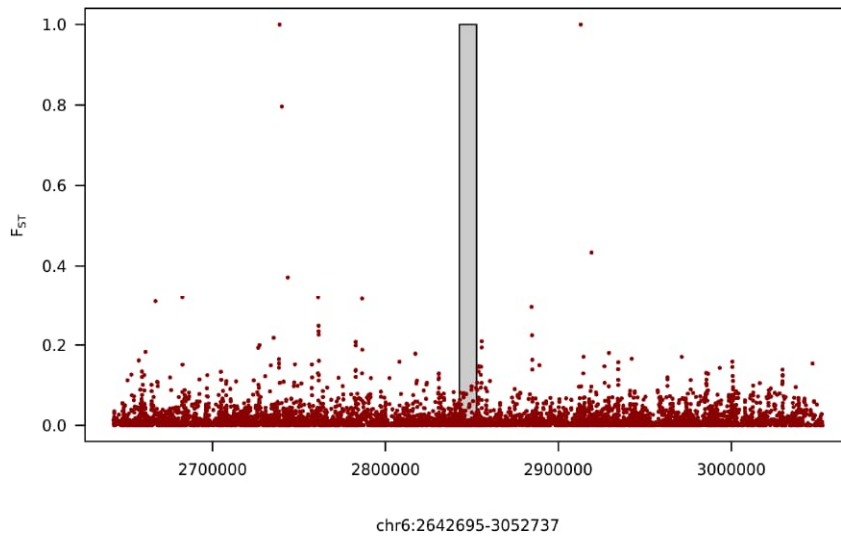

Seizure

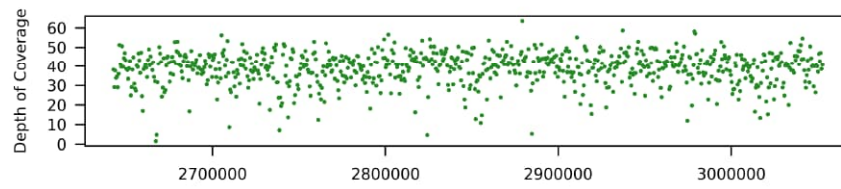

d21

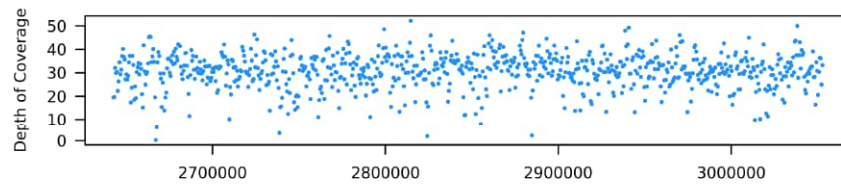

d22

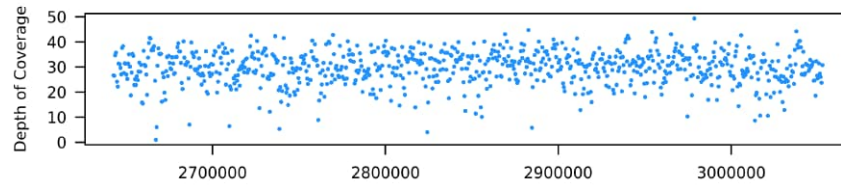

d31

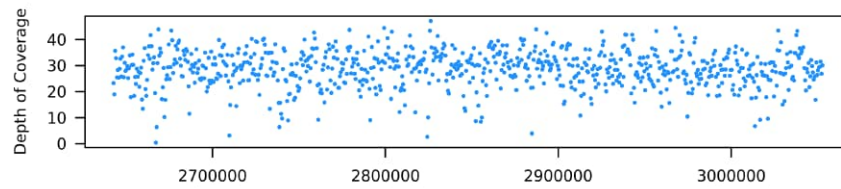

d32

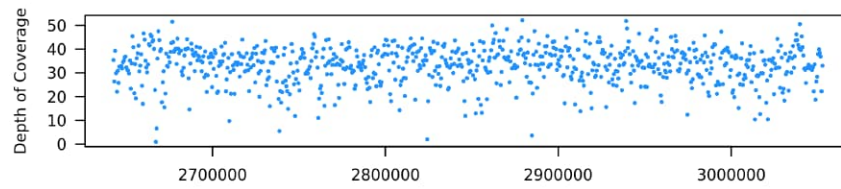



110255744 LOC110255744

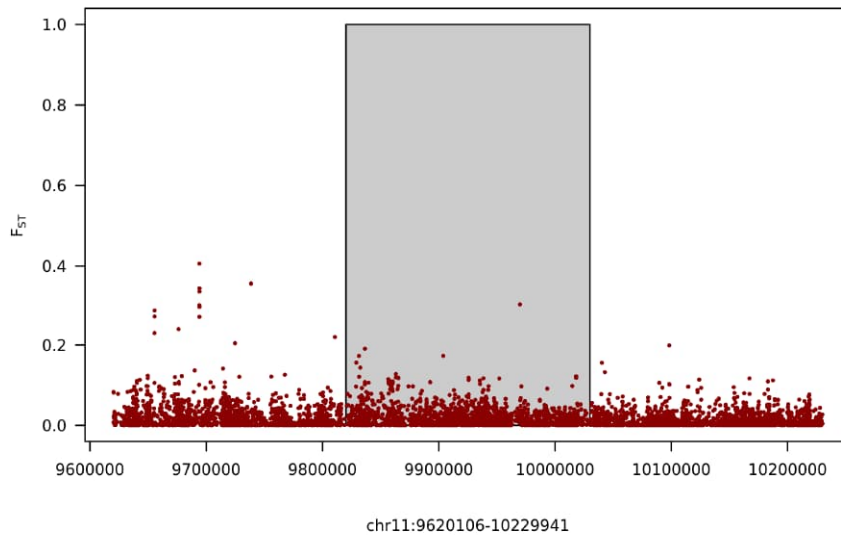

Seizure

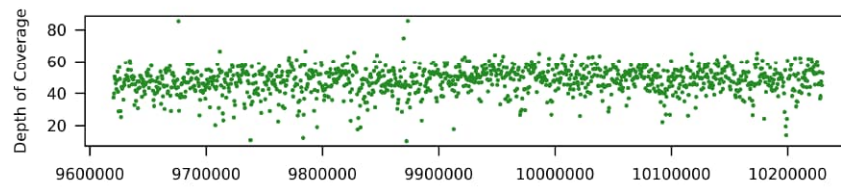

d21

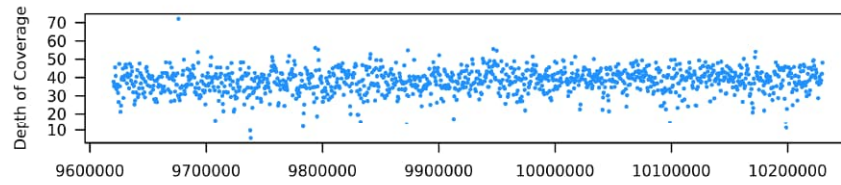

d22

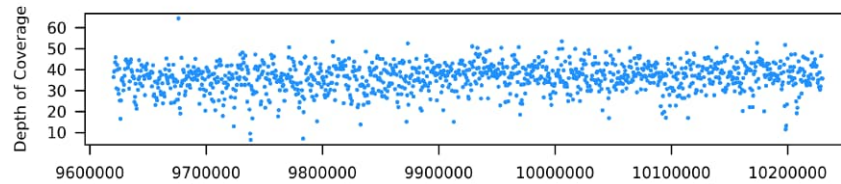

d31

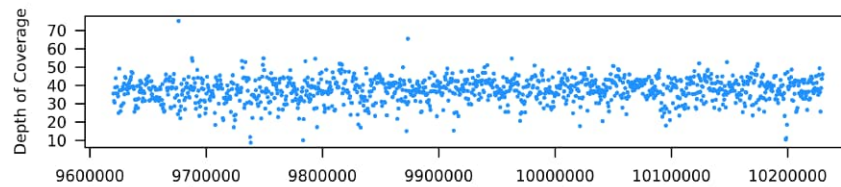

d32

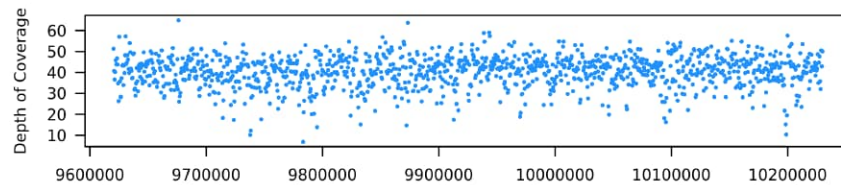

**110256621 TBX1**

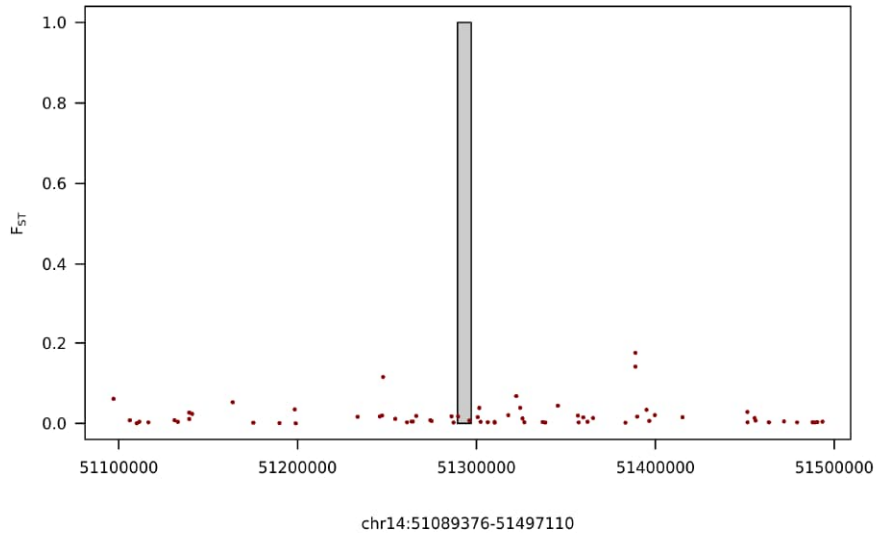

**Seizure**

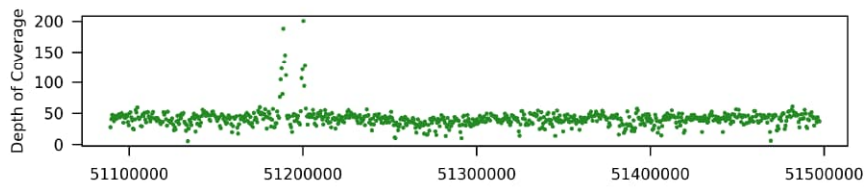

**d21**

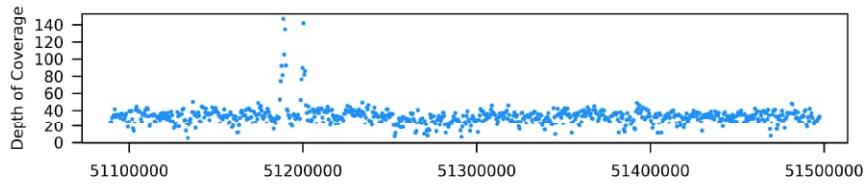

**d22**

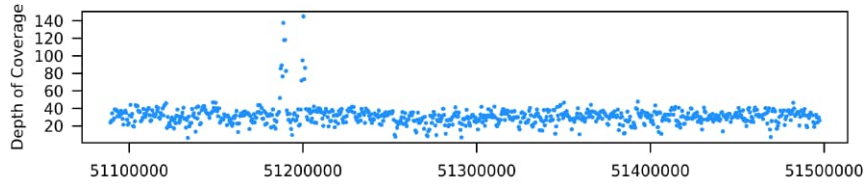

**d31**

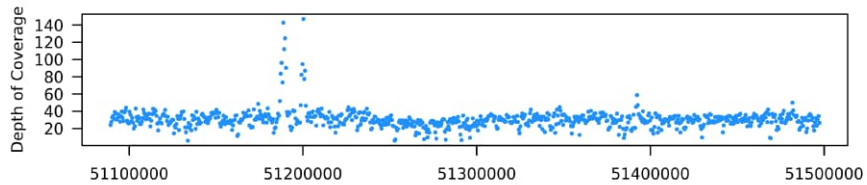

**d32**

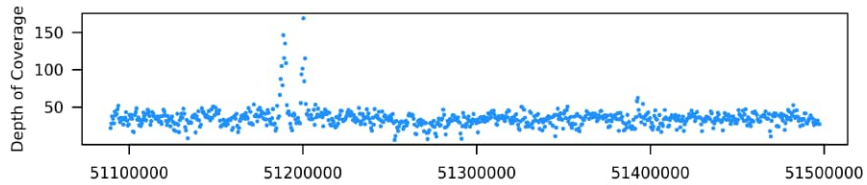

110256817 LOC110256817

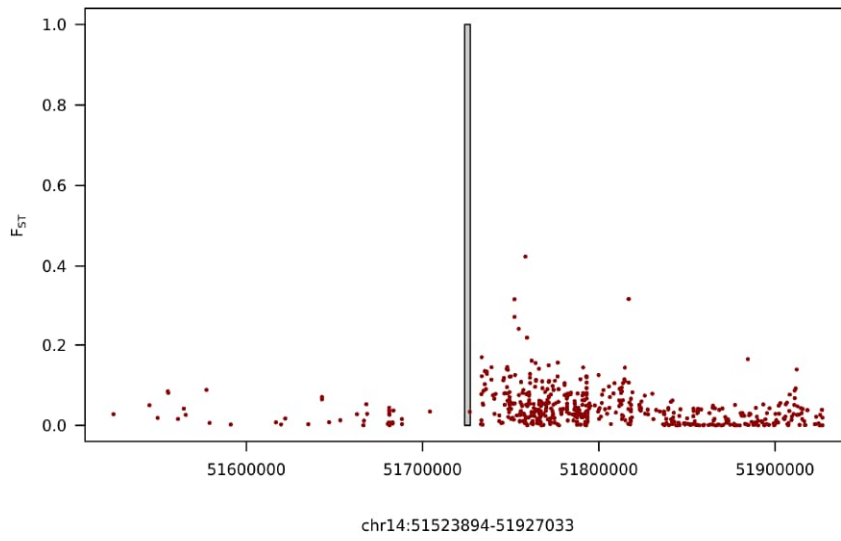

Seizure

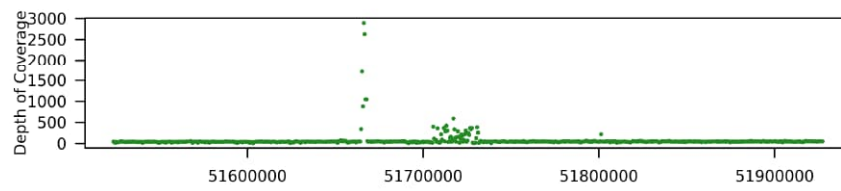

d21

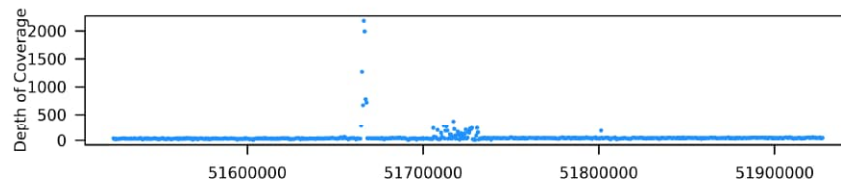

d22

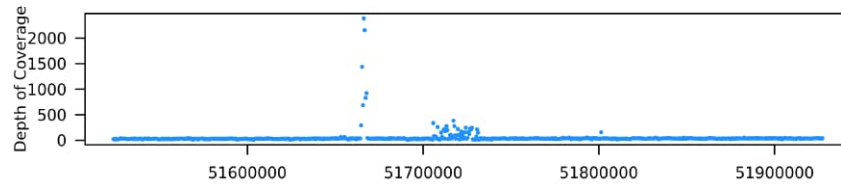

d31

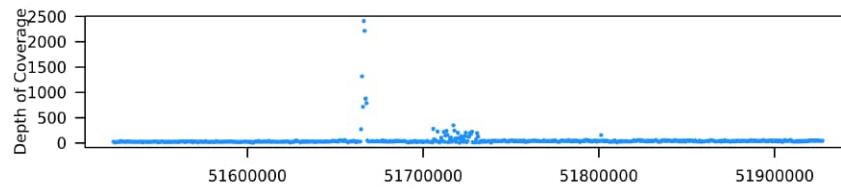

d32

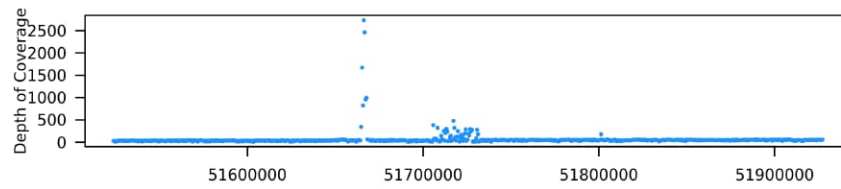

110256818 LOC110256818

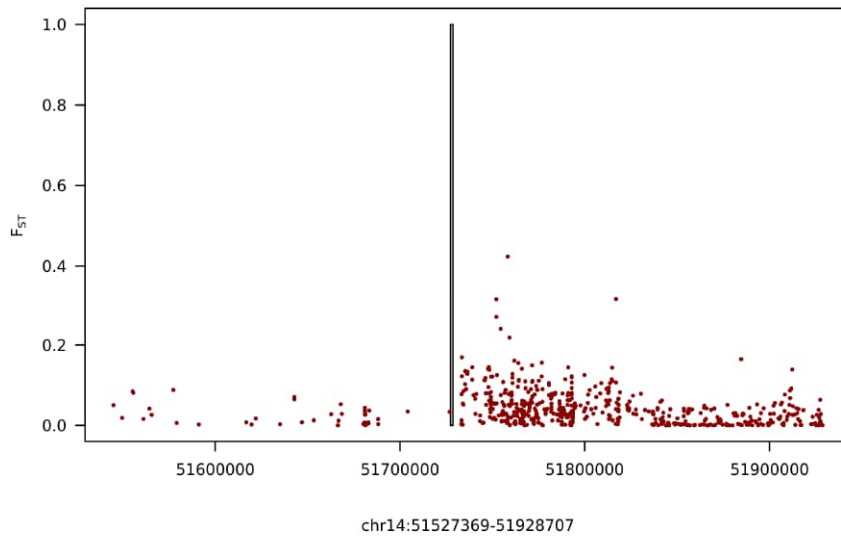

Seizure

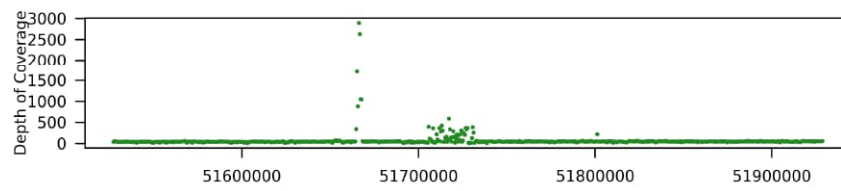

d21

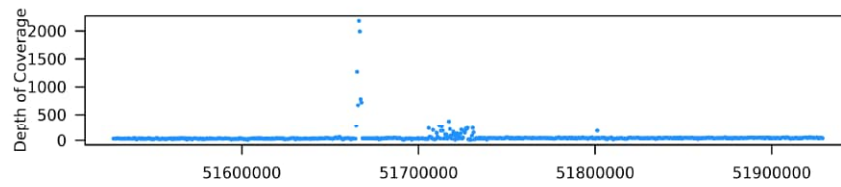

d22

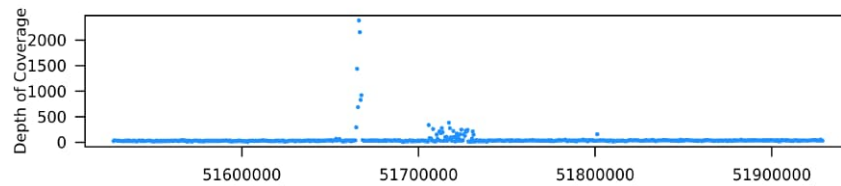

d31

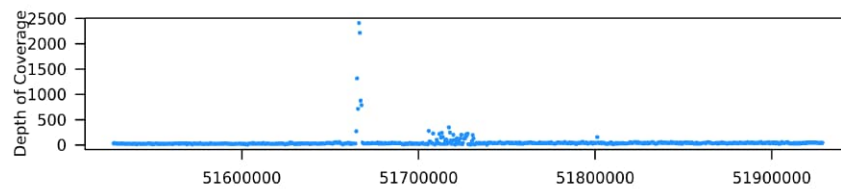

d32

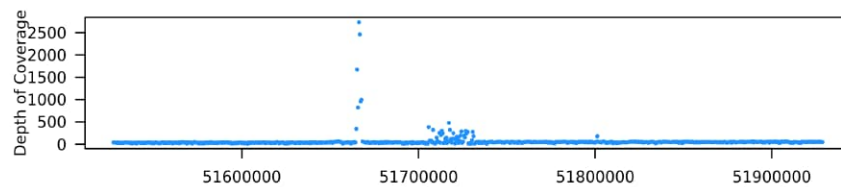

110259223 LOC110259223

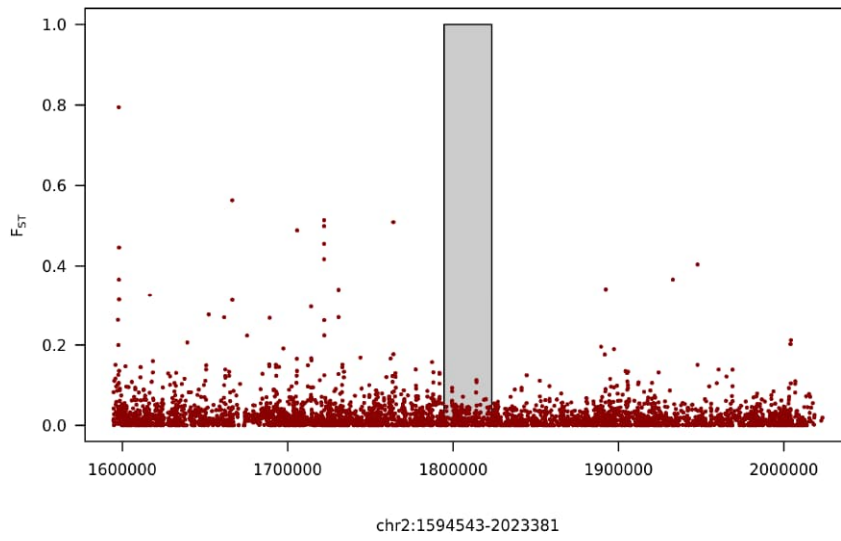

Seizure

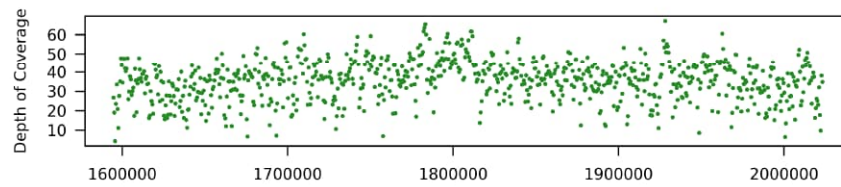

d21

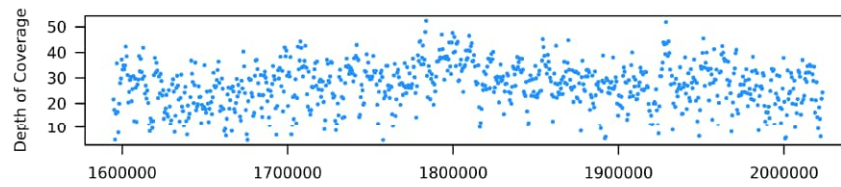

d22

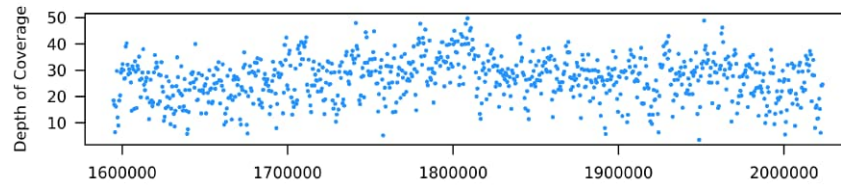

d31

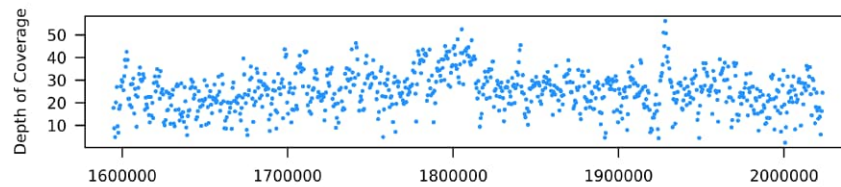

d32

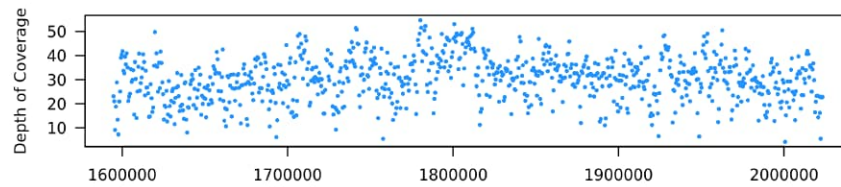



110259950 CACNA1H

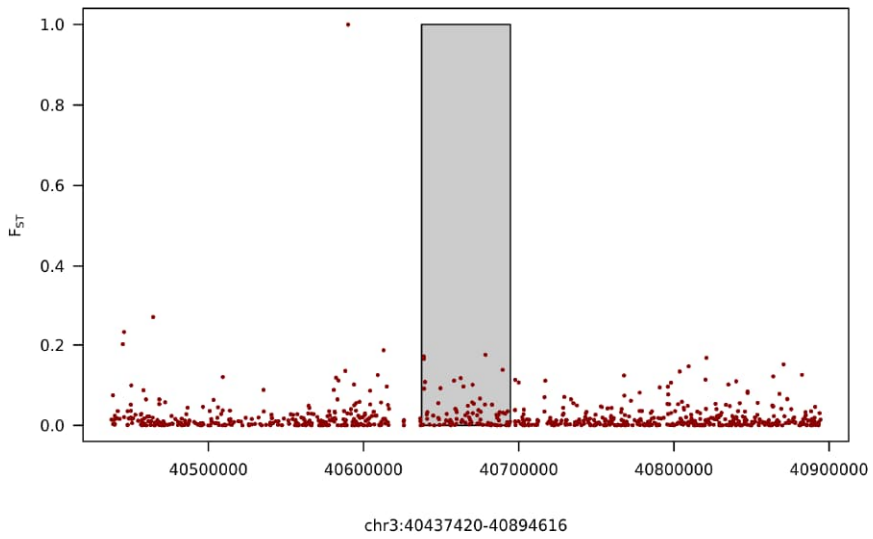

Seizure

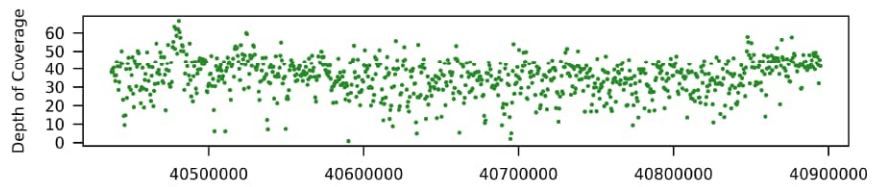

d21

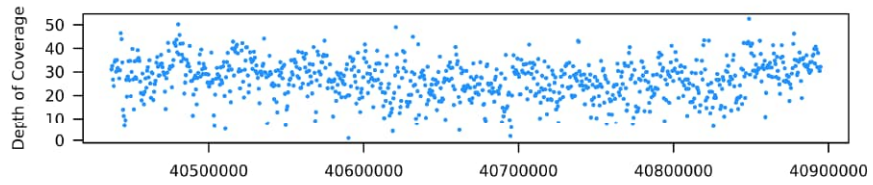

d22

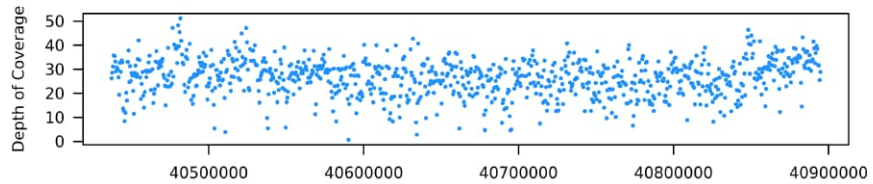

d31

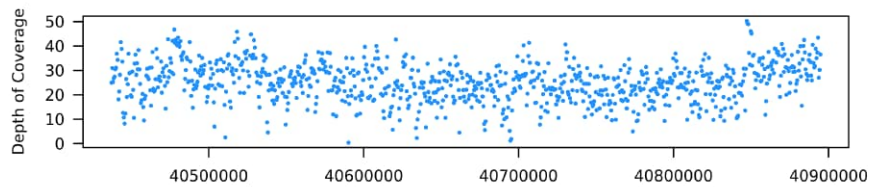

d32

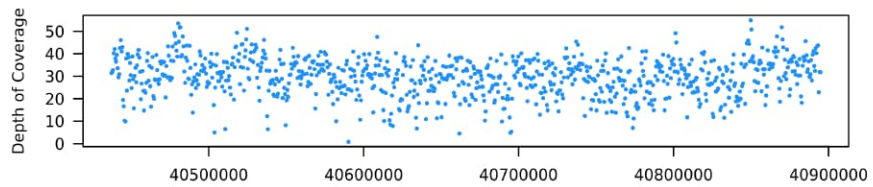

# 110260602 MAPK8IP2

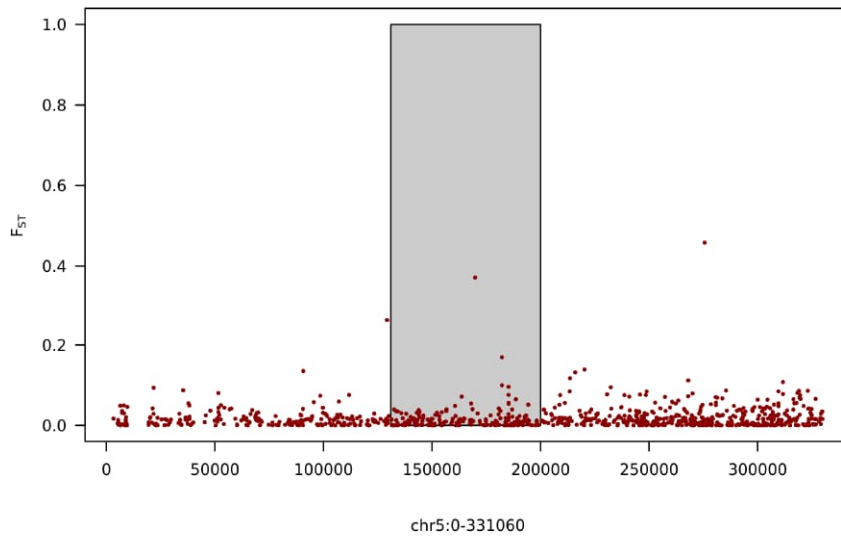

## Seizure

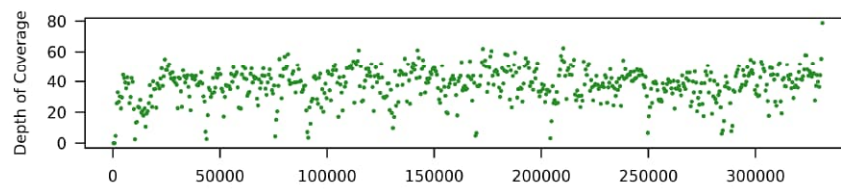

## d21

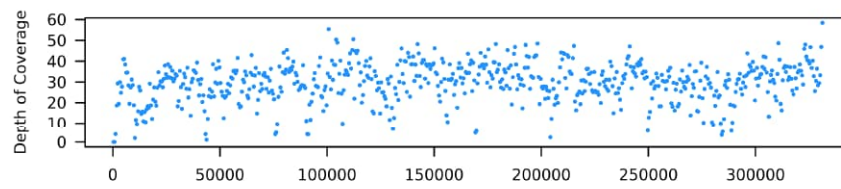

## d22

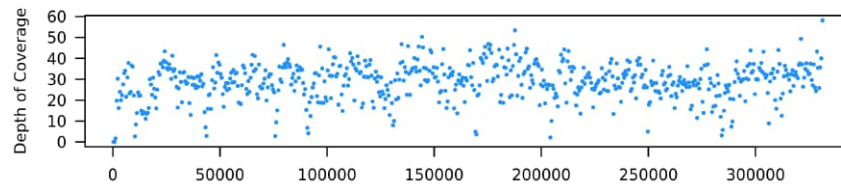

## d31

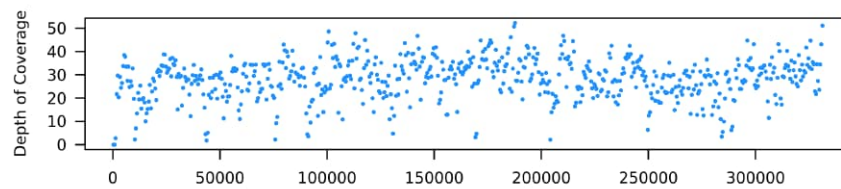

## d32

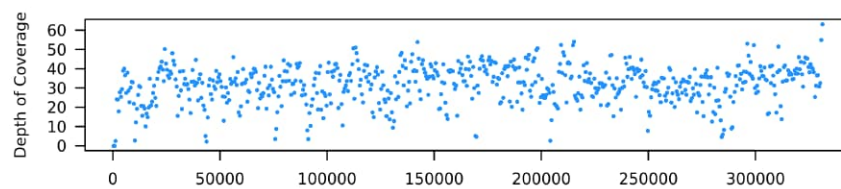

Supplement: MOESM6 [file 26759830]
